# Supplementary material for: Ru-Tethered (R,R)-TsDPEN with DMAB as an efficient catalytic system for high enantioselective one-pot synthesis of chiral β-aminol via asymmetric transfer hydrogenation
Source: Royal Society of Chemistry journal article supplement (doi:10.1039/d0nj06108e), 2021-01-01
Supplement: d0nj06108e1.pdf [file d0nj06108e1.pdf]

Ru-Tethered (*R, R*)-TsDpen with DMAB as an efficient Catalytic system for  
High Enantioselective One-Pot Synthesis of Chiral  $\beta$ -aminol *via* Asymmetric  
Transfer Hydrogenation

Ashish A. Mishra and Prof. Bhalchandra M. Bhanage\*

Department of Chemistry, Institute of Chemical Technology,  
Nathalal Parekh Marg, Matunga, Mumbai 400019, India;  
Fax: (+91)-22-24145614; phone:(+91)-22-3361-1111/2222  
E-mail: [bm.bhanage@gmail.com](mailto:bm.bhanage@gmail.com) ; [bm.bhanage@ictmumbai.edu.in](mailto:bm.bhanage@ictmumbai.edu.in)

| Sr. No. | Title of Index                                                                                      | Page    |
|---------|-----------------------------------------------------------------------------------------------------|---------|
| 1.      | Materials, Methods and data for the synthesised product ( <i>chiral <math>\beta</math>-aminol</i> ) | S2-S11  |
| 2.      | $^1\text{H}$ & $^{13}\text{C}$ -NMR of <i><math>\beta</math>-aminol</i>                             | S12-S29 |
| 3.      | HPLC of <i>racemic</i> and <i>chiral <math>\beta</math>-aminol</i>                                  | S30-S47 |

### General material and methods for the synthesis of catalyst:

For the preparation of substituted  $\alpha$ -bromoketones various chemicals were used such as: 2-Bromoacetophenone, *n*-hexane (HPLC grade) and IPA (HPLC grade) were procured from Oxford Product Pvt. Ltd. 2'-floroacetophenone, 2'-chloroacetophenone, 2'-bromoacetophenone, 2'-methoxyacetophenone and 2'-methylacetophenone were purchased from Spectrochem. 2',5'-dimethoxyacetophenone, 2',3'-dimethoxyacetophenone, 3'-chloroacetophenone, 4'-chloroacetophenone, NaHCO<sub>3</sub> and Ru-Teth-TsDPEN (*R, R*) catalyst was purchased from Sigma Aldrich. MeOH, bromine liquid (for synthesis) and DCM were purchased from s d-fine chemicals. Thin Layer Chromatography Silica Gel 60 F<sub>254</sub> was purchased from Merck Specialities Pvt. Ltd., Silica gel for column chromatography (100-200 mesh) was purchased from SRL, India. NMR spectra were recorded with 500 MHz for <sup>1</sup>H NMR and 126 MHz for <sup>13</sup>C NMR spectrometer. The chemical shifts are reported in parts per million related to tetramethyl silane as an internal standard and the coupling constant *J* in hertz. <sup>1</sup>H NMR spectra are reported relative to residual CDCl<sub>3</sub> (d= 7.26 ppm), <sup>13</sup>C NMR are reported relative to CDCl<sub>3</sub> (d=77.02 ppm). The reaction was monitored by GC and TLC. The products were analysed and confirmed by GC-MS and NMR-Spectroscopy. Enantiomeric excess was determined by HPLC analysis, using chiral column ChiralPAK AD-H and ChiralPAK OJ-H. Optical rotation was measured by Rudolph Research Analytical Autopol VI automatic polarimeter using a 50 mm path-length cell at 589 nm.

### Preparation of $\alpha$ -bromoketone:

Different substituted  $\alpha$ -bromoketones were prepared except A1 by dissolving substituted acetophenone derivatives of 2 mmol in 15 mL of methanol for 30 min. followed by gradual addition of 2-3 mL of liquid bromine in it. Reaction stirred for 5-6 h followed by extraction with ethyl acetate and chilled water, followed by dried of this organic layer over anhydrous Na<sub>2</sub>SO<sub>4</sub> further it is filtered and solvent removed under vacuum on rotary evaporator. Final mixture then purified using silica gel chromatography (eluent: *n*-hexane-ethyl acetate, 98-2) to obtain pure substituted  $\alpha$ -bromoketones which was then kept under freeze for 12 h as a result most of the compound get solidified and then used in the reaction for chiral synthesis of  $\beta$ -aminol.

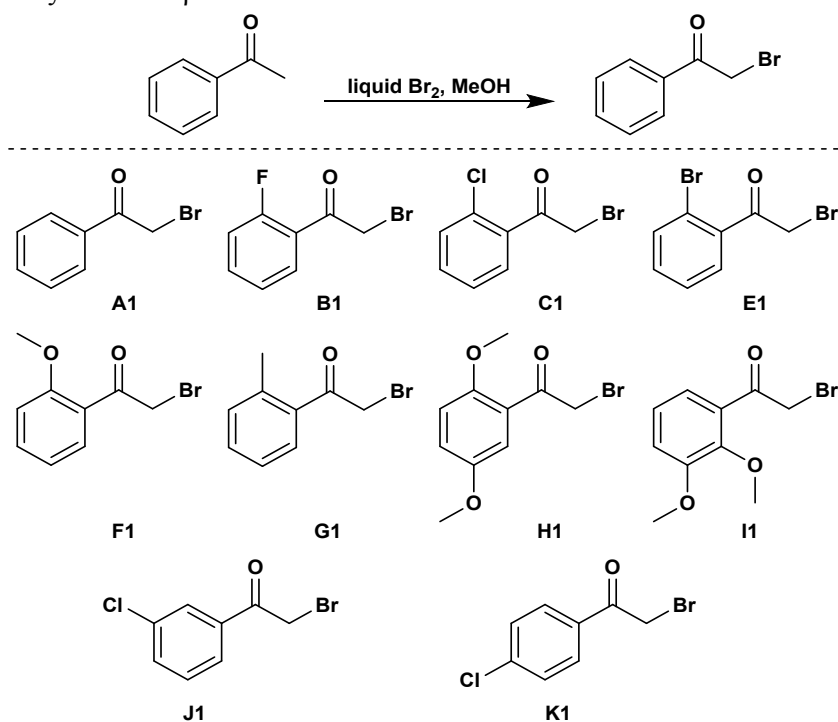

**Scheme S1:** Preparation of  $\alpha$ -bromoketones and its derivatives.

### Analytical data of $\beta$ -aminol:

#### **(-)-1-phenyl-2-(phenylamino) ethan-1-ol [D1]**

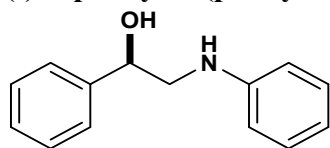

In 15 ml of pressure tube cylinder 1 mmol of 2-bromoacetophenone (A1) and 1 mmol of aniline are taken along with 1 mol% of catalyst Ru-Teth-TsDPEN (*R, R*) which was then dissolved in 4 ml of DCM along with the addition of 1 mmol of NaHCO<sub>3</sub>. After 15 min again 1 mmol of DMAB is added under nitrogen atmosphere and the synthesis of product determined by repeated checking with Thin Layer Chromatography (TLC) further compound is extracted with DCM and water, after this organic layer is dried over anhydrous Na<sub>2</sub>SO<sub>4</sub> filtered and solvent removed under vacuum on rotary evaporator. Final mixture then purified using silica gel column chromatography (eluent: *n*-hexane-ethyl acetate, 90-10) to obtain pure (-)-1-phenyl-2-(phenylamino) ethan-1-ol.

Yellow liquid; Yield = 209 mg (98%); (97.95: 2.05 %er, 96% ee);  $R_f = 0.65$  (*n*-hexane: ethyl acetate, 25

90:10 v/v);  $[\alpha]_D^{25} = -33.5$  ( $c = 1.0$  in abs. EtOH)

**MS (EI, 70 eV) m/z (%):** 213 (M<sup>+</sup>15), 182 (100), 107 (100), 77 (85)

**<sup>1</sup>H NMR** (500 MHz, CDCl<sub>3</sub>)  $\delta$  7.45 – 7.37 (m, 4H), 7.36 – 7.31 (m, 1H), 7.24 – 7.16 (m, 2H), 6.76 (t,  $J = 7.3$  Hz, 1H), 6.69 (d,  $J = 7.7$  Hz, 2H), 4.93 (dd,  $J = 8.3, 3.4$  Hz, 1H), 3.44 (dd,  $J = 13.1, 3.4$  Hz, 1H), 3.31 (dd,  $J = 13.1, 8.3$  Hz, 1H); **<sup>13</sup>C NMR** (126 MHz, CDCl<sub>3</sub>)  $\delta$  147.86, 142.02, 129.34, 128.63, 128.00, 125.89, 118.13, 113.46, 72.47, 51.79.

**HPLC** (CHIRALPAK<sup>®</sup>AD-H elute: *n*-Hexane/*i*-PrOH = 90/10, detector: 210–280 nm, flow rate: 1.0 mL/min);  $t_{major} = 9.10$  min,  $t_{minor} = 10.94$  min.

#### **(-)-1-(2-fluorophenyl)-2-(*p*-tolylamino) ethan-1-ol [D2]**

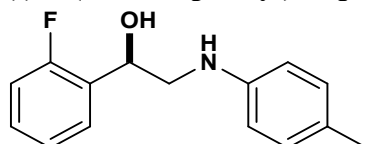

In 15 ml of pressure tube cylinder 1 mmol of 2-bromo-2'-fluoroacetophenone (B1) and 1 mmol of *p*-toluidine are taken along with 1 mol% of catalyst Ru-Teth-TsDPEN (*R, R*) which was then dissolved in 4 mL of DCM along with the addition of 1 mmol of NaHCO<sub>3</sub>. After 15 min again 1 mmol of DMAB is added under nitrogen atmosphere and the synthesis of product determined by repeated checking with Thin Layer Chromatography (TLC) further compound is extracted with DCM and water, after this organic layer is dried over anhydrous Na<sub>2</sub>SO<sub>4</sub> filtered and solvent removed under vacuum on rotary evaporator. Final mixture then purified using silica gel column chromatography (eluent: *n*-hexane-ethyl acetate, 90-10) to obtain pure (-)-1-(2-fluorophenyl)-2-(*p*-tolylamino) ethan-1-ol.

Colourless liquid; Yield = 240 mg (98%); (99.6: 0.4 %er, 99% ee);  $R_f = 0.59$  (*n*-hexane: ethyl acetate, 25

90:10 v/v);  $[\alpha]_D^{25} = -25.7$  ( $c = 1.0$  in abs. EtOH)

**MS (EI, 70 eV) m/z (%):** 245 (M<sup>+</sup>15), 137 (74), 109 (100), 95 (19)

**<sup>1</sup>H NMR** (500 MHz, CDCl<sub>3</sub>)  $\delta$  7.56 (td,  $J = 7.4, 1.3$  Hz, 1H), 7.33 – 7.26 (m, 1H), 7.19 (td,  $J = 7.5, 0.9$  Hz, 1H), 7.06 (ddd,  $J = 10.4, 8.3, 1.0$  Hz, 1H), 7.03 (dd,  $J = 12.3, 4.5$  Hz, 2H), 6.65 (d,  $J = 8.4$  Hz, 2H), 5.24 (dd,  $J = 8.8, 3.1$  Hz, 1H), 3.52 (dd,  $J = 13.3, 3.1$  Hz, 1H), 3.21 (dd,  $J = 13.3, 9.0$  Hz, 1H), 2.25 (s, 3H); **<sup>13</sup>C NMR** (126 MHz, CDCl<sub>3</sub>)  $\delta$  160.75, 158.80, 145.37, 129.84, 129.19, 129.13, 127.53, 127.31, 127.28, 124.42, 124.39, 115.37, 115.20, 113.65, 66.66, 51.02, 20.38.

**HPLC** (CHIRALCEL®OJ-H elute: *n*-Hexane/*i*-PrOH = 90/10, detector: 210–280 nm, flow rate: 0.7 mL/min);  $t_{\text{major}} = 30.26$  min,  $t_{\text{minor}} = 35.38$  min.

**(-) 1-(2-chlorophenyl)-2-(*p*-tolylamino) ethan-1-ol [D3]**

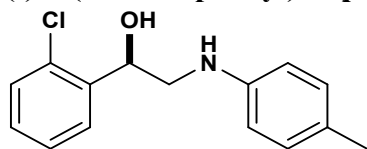

In 15 ml of pressure tube cylinder prepared 1 mmol of 2-bromo-2'-chloroacetophenone (C1) and 1 mmol of *p*-toluidine are taken along with 1 mol% of catalyst Ru-Teth-TsDPEN (*R,R*) which was then dissolved in 4 mL of DCM along with the addition of 1 mmol of NaHCO<sub>3</sub>. After 15 min again 1 mmol of DMAB is added under nitrogen atmosphere and the synthesis of product determined by repeated checking with Thin Layer Chromatography (TLC) further compound is extracted with DCM and water, after this organic layer is dried over anhydrous Na<sub>2</sub>SO<sub>4</sub> filtered and solvent removed under vacuum on rotary evaporator. Final mixture then purified using silica gel column chromatography (eluent: *n*-hexane-ethyl acetate, 90-10) to obtain pure (-)-1-(2-chlorophenyl)-2-(*p*-tolylamino) ethan-1-ol.

Colourless liquid; Yield = 253 mg (97%); (95.82: 4.18 %er, 92% ee);  $R_f = 0.57$  (*n*-hexane: ethyl acetate, 25

90:10 v/v);  $[\alpha]_D^{25} = -37.5$  ( $c = 1.0$  in abs. EtOH)

**MS (EI, 70 eV) m/z (%)**: 261 (M<sup>+</sup>9), 263 (3), 120 (100), 91 (14), 65 (9)

**<sup>1</sup>H NMR** (500 MHz, CDCl<sub>3</sub>)  $\delta$  7.64 (d,  $J = 6.5$  Hz, 1H), 7.36 (d,  $J = 7.9$  Hz, 1H), 7.33 (t,  $J = 7.8$  Hz, 1H), 7.24 (d,  $J = 7.5$  Hz, 1H), 7.02 (d,  $J = 7.9$  Hz, 2H), 6.68 (d,  $J = 8.2$  Hz, 2H), 5.32 (dd,  $J = 8.9, 2.7$  Hz, 1H), 3.58 (dd,  $J = 13.4, 2.7$  Hz, 1H), 3.10 (dd,  $J = 13.4, 9.1$  Hz, 1H), 2.25 (s, 3H); **<sup>13</sup>C NMR** (126 MHz, CDCl<sub>3</sub>)  $\delta$  145.40, 139.40, 129.81, 129.41, 128.78, 127.56, 127.27, 127.19, 113.74, 106.03, 69.05, 50.52, 20.38.

**HPLC** (CHIRALPAK®AD-H elute: *n*-Hexane/*i*-PrOH = 90/10, detector: 210–280 nm, flow rate: 1.2 mL/min);  $t_{\text{major}} = 16.31$  min,  $t_{\text{minor}} = 18.63$  min.

**(-) 1-(2-bromophenyl)-2-(*p*-tolylamino) ethan-1-ol [D4]**

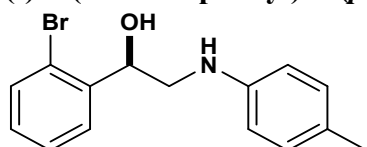

In 15 ml of pressure tube cylinder prepared 1 mmol of 2-bromo-2'-bromoacetophenone (E1) and 1 mmol of *p*-toluidine are taken along with 1 mol% of catalyst Ru-Teth-TsDPEN (*R,R*) which was then dissolved in 4 mL of DCM along with the addition of 1 mmol of NaHCO<sub>3</sub>. After 15 min. again 1 mmol of DMAB is added under nitrogen atmosphere and the synthesis of product determined by repeated checking with Thin Layer Chromatography (TLC) further compound is extracted with DCM and water, after this organic layer is dried over anhydrous Na<sub>2</sub>SO<sub>4</sub> filtered and solvent removed under vacuum on rotary evaporator. Final mixture then purified using silica gel column chromatography (eluent: *n*-hexane-ethyl acetate, 90-10) to obtain pure (-)-1-(2-bromophenyl)-2-(*p*-tolylamino) ethan-1-ol.

Colourless liquid; Yield = 297 mg (97%); (3.57: 96.43 %er, 93% ee);  $R_f = 0.50$  (*n*-hexane: ethyl acetate, 25

90:10 v/v);  $[\alpha]_D^{25} = -27.3$  ( $c = 1.0$  in abs. EtOH)

**MS (EI, 70 eV) m/z (%)**: 305/307 (M<sup>+</sup>24), 185/187 (100), 105 (51), 77 (28)

**<sup>1</sup>H NMR** (500 MHz, CDCl<sub>3</sub>)  $\delta$  7.64 (dd,  $J = 7.7, 1.4$  Hz, 1H), 7.55 (dd,  $J = 8.0, 1.0$  Hz, 1H), 7.37 (td,  $J = 7.7, 0.7$  Hz, 1H), 7.17 (td,  $J = 7.9, 1.7$  Hz, 1H), 7.02 (d,  $J = 8.0$  Hz, 2H), 6.70 (d,  $J = 8.4$  Hz, 2H), 5.26 (dd,  $J = 9.1, 3.0$  Hz, 1H), 3.58 (dd,  $J = 13.4, 3.0$  Hz, 1H), 3.09 (dd,  $J = 13.4, 9.1$  Hz, 1H), 2.25 (s,



3H);  $^{13}\text{C}$  NMR (126 MHz,  $\text{CDCl}_3$ )  $\delta$  145.38, 140.99, 132.69, 129.80, 129.17, 127.80, 127.61, 127.58, 121.81, 113.82, 71.23, 50.58, 20.38.

**HPLC** (CHIRALCEL<sup>®</sup>OJ-H elute: *n*-Hexane/*i*-PrOH = 90/10, detector: 210–280 nm, flow rate: 0.7 mL/min);  $t_{\text{major}}$  = 45.91 min,  $t_{\text{minor}}$  = 43.27 min.

#### (-) 1-(2-methoxyphenyl)-2-(*p*-tolylamino) ethan-1-ol [D5]

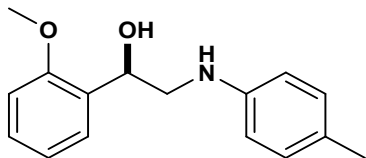

In 15 ml of pressure tube cylinder prepared 1 mmol of 2-bromo-2'-methoxyacetophenone (F1) and 1 mmol of *p*-toluidine are taken along with 1 mol% of catalyst Ru-Teth-TsDPEN (*R, R*) which was then dissolved in 4 mL of DCM along with the addition of 1.2 mmol of  $\text{NaHCO}_3$ . After 15 min again 1 mmol of DMAB is added under nitrogen atmosphere and the synthesis of product determined by repeated checking with Thin Layer Chromatography (TLC) further compound is extracted with DCM and water, after this organic layer is dried over anhydrous  $\text{Na}_2\text{SO}_4$  filtered and solvent removed under vacuum on rotary evaporator. Final mixture then purified using silica gel column chromatography (eluent: *n*-hexane-ethyl acetate, 90-10) to obtain pure (-)-1-(2-methoxyphenyl)-2-(*p*-tolylamino) ethan-1-ol.

Colourless liquid; Yield = 239 mg (93%), (98.95: 1.05 %er, 98% ee);  $R_f$  = 0.58 (*n*-hexane: ethyl acetate, 25

90:10 v/v);  $[\alpha]_{\text{D}}^{25} = -37.5$  ( $c = 1.0$  in abs. EtOH)

**MS (EI, 70 eV) m/z (%)**: 257 ( $\text{M}^+30$ ), 241 (64), 120 (100), 107 (42), 77 (18)

$^1\text{H}$  NMR (500 MHz,  $\text{CDCl}_3$ )  $\delta$  7.33 (d,  $J = 8.4$  Hz, 2H), 7.01 (d,  $J = 8.0$  Hz, 2H), 6.92 (d,  $J = 8.7$  Hz, 2H), 6.61 (d,  $J = 8.4$  Hz, 2H), 4.86 (dd,  $J = 8.6, 3.9$  Hz, 1H), 3.82 (s, 3H), 3.36 (dd,  $J = 13.0, 4.0$  Hz, 1H), 3.27 (dd,  $J = 13.0, 8.6$  Hz, 1H), 2.25 (s, 3H);  $^{13}\text{C}$  NMR (126 MHz,  $\text{CDCl}_3$ )  $\delta$  159.34, 145.60, 134.18, 129.79, 127.76, 127.16, 113.99, 113.67, 72.05, 67.37, 59.56, 55.31, 52.18, 20.38.

**HPLC** (CHIRALPAK<sup>®</sup>AD-H elute: *n*-Hexane/*i*-PrOH = 90/10, detector: 210–280 nm, flow rate: 1.0 mL/min);  $t_{\text{major}}$  = 19.24 min,  $t_{\text{minor}}$  = 20.04 min.

#### (-) 1-(*o*-tolyl)-2-(*p*-tolylamino) ethan-1-ol [D6]

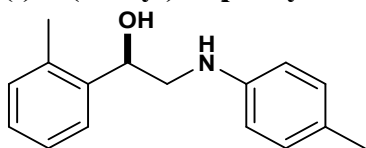

In 15 ml of pressure tube cylinder prepared 1 mmol of 2-bromo-2'-methylacetophenone (G1) and 1 mmol of *p*-toluidine are taken along with 1 mol% of catalyst Ru-Teth-TsDPEN (*R, R*) which was then dissolved in 4 mL of DCM along with the addition of 1.2 mmol of  $\text{NaHCO}_3$ . After 15 min again 1 mmol of DMAB is added under nitrogen atmosphere and the synthesis of product determined by repeated checking with Thin Layer Chromatography (TLC) further compound is extracted with DCM and water, after this organic layer is dried over anhydrous  $\text{Na}_2\text{SO}_4$  filtered and solvent removed under vacuum on rotary evaporator. Final mixture then purified using silica gel column chromatography (eluent: *n*-hexane-ethyl acetate, 90-10) to obtain pure (-)-1-(*o*-tolyl)-2-(*p*-tolylamino) ethan-1-ol.

Colourless liquid; Yield = 219 mg (91%), (96.57: 3.43 %er, 93% ee);  $R_f$  = 0.64 (*n*-hexane: ethyl acetate, 25

90:10 v/v);  $[\alpha]_{\text{D}}^{25} = -45.3$  ( $c = 1.0$  in abs. EtOH)

**MS (EI, 70 eV) m/z (%)**: 241 ( $\text{M}^+62$ ), 120 (100), 107 (39), 77 (25)

**<sup>1</sup>H NMR** (500 MHz, CDCl<sub>3</sub>) δ 7.55 (d, *J* = 6.8 Hz, 1H), 7.26 (t, *J* = 3.0 Hz, 1H), 7.22 (td, *J* = 7.3, 1.3 Hz, 1H), 7.17 (d, *J* = 6.8 Hz, 1H), 7.01 (d, *J* = 7.9 Hz, 2H), 6.62 (d, *J* = 8.3 Hz, 2H), 5.15 (dd, *J* = 9.0, 3.4 Hz, 1H), 3.40 (dd, *J* = 13.1, 3.4 Hz, 1H), 3.20 (dd, *J* = 13.1, 9.0 Hz, 1H), 2.38 (s, 3H), 2.25 (s, 3H); **<sup>13</sup>C NMR** (126 MHz, CDCl<sub>3</sub>) δ 145.61, 140.07, 134.68, 130.48, 129.82, 127.64, 127.44, 126.41, 125.44, 113.65, 69.11, 51.03, 20.38, 19.13.

**HPLC** (CHIRALCEL<sup>®</sup>OJ-H elute: *n*-Hexane/*i*-PrOH = 90/10, detector: 210–280 nm, flow rate: 0.7 mL/min); *t*<sub>major</sub> = 31.46 min, *t*<sub>minor</sub> = 32.13 min.

**(-)-1-(2,5-dimethoxyphenyl)-2-(*p*-tolylamino) ethan-1-ol [D7]**

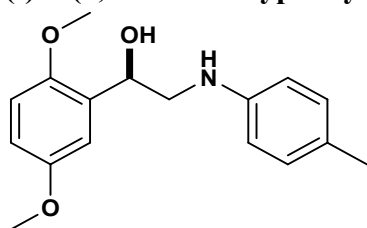

In 15 ml of pressure tube cylinder prepared 1 mmol of 2-bromo-2',5'-dimethoxyacetophenone (H1) and 1 mmol of *p*-toluidine are taken along with 1 mol% of catalyst Ru-Teth-TsDPEN (*R, R*) which was then dissolved in 4 mL of DCM along with the addition of 1.2 mmol of NaHCO<sub>3</sub>. After 15 min again 1 mmol of DMAB is added under nitrogen atmosphere and the synthesis of product determined by repeated checking with Thin Layer Chromatography (TLC) further compound is extracted with DCM and water, after this organic layer is dried over anhydrous Na<sub>2</sub>SO<sub>4</sub> filtered and solvent removed under vacuum on rotary evaporator. Final mixture then purified using silica gel column chromatography (eluent: *n*-hexane-ethyl acetate, 90-10) to obtain pure (-)-1-(2,5-dimethoxyphenyl)-2-(*p*-tolylamino) ethan-1-ol.

Colourless liquid; Yield = 273 mg (95%), (98.54: 1.46 %er, 97% ee); *R*<sub>f</sub> = 0.59 (*n*-hexane: ethyl acetate, 25

90:10 v/v); [α]<sup>D</sup> = -60.0 (*c* = 1.0 in abs. EtOH)

**MS (EI, 70 eV) m/z (%)**: 287 (M<sup>+</sup>+11), 271 (30), 165 (100), 120 (81), 107 (41), 77 (15)

**<sup>1</sup>H NMR** (500 MHz, CDCl<sub>3</sub>) δ 7.01 (dd, *J* = 7.2, 5.7 Hz, 3H), 6.81 (dt, *J* = 8.9, 5.9 Hz, 2H), 6.65 (d, *J* = 8.4 Hz, 2H), 5.11 (dd, *J* = 8.8, 3.5 Hz, 1H), 3.84 (s, 3H), 3.78 (s, 3H), 3.49 (dd, *J* = 13.0, 3.5 Hz, 1H), 3.20 (dd, *J* = 13.0, 8.8 Hz, 1H), 2.25 (s, 3H); **<sup>13</sup>C NMR** (126 MHz, CDCl<sub>3</sub>) δ 153.89, 150.57, 145.78, 131.07, 129.72, 127.02, 113.55, 112.99, 112.94, 111.45, 68.94, 55.79, 55.76, 50.49, 20.36.

**HPLC** (CHIRALCEL<sup>®</sup>OJ-H elute: *n*-Hexane/*i*-PrOH = 90/10, detector: 210–280 nm, flow rate: 0.8 mL/min); *t*<sub>major</sub> = 28.03 min, *t*<sub>minor</sub> = 31.71 min.

**(-)-2-((2-methoxy-5-methylphenyl) amino)-1-phenylethan-1-ol (D8)**

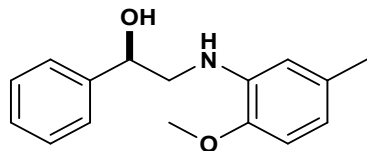

In 15 ml of pressure tube cylinder prepared 1 mmol of 2-bromoacetophenone (A1) taken along with 1 mmol of 2-methoxy-5-methylaniline and 1 mol% of catalyst Ru-Teth-TsDPEN (*R, R*) which was then dissolved in 4 mL of DCM along with the addition of 1.5 mmol of NaHCO<sub>3</sub>. After 15 min. 1 mmol of DMAB is added under nitrogen atmosphere and the synthesis of product determined by repeated checking with Thin Layer Chromatography (TLC) further compound is extracted with DCM and water, after this organic layer is dried over anhydrous Na<sub>2</sub>SO<sub>4</sub> filtered and solvent removed under vacuum on rotary evaporator. Final mixture then purified using silica-gel column chromatography (eluent: *n*-hexane-ethyl acetate, 90-10) to obtain pure (-)-2-((2-methoxy-5-methylphenyl) amino)-1-phenylethan-1-ol.

Colourless liquid; Yield = 231 mg (90%), (97.9: 2.3 %er, 95% ee);  $R_f = 0.59$  (*n*-hexane: ethyl acetate, 25

90:10 v/v);  $[\alpha]_D^{25} = -63.3$  ( $c = 1.0$  in abs. EtOH)

**MS (EI, 70 eV) m/z (%):** 257 ( $M^{+18}$ ), 151 (100), 122 (75), 77 (21)

**$^1\text{H NMR}$**  (500 MHz,  $\text{CDCl}_3$ )  $\delta$  7.45 – 7.35 (m, 4H), 7.34 – 7.28 (m, 1H), 6.67 (d,  $J = 8.5$  Hz, 1H), 6.50 (s, 2H), 4.93 (dd,  $J = 8.9, 3.4$  Hz, 1H), 3.80 (s, 3H), 3.41 (dd,  $J = 13.1, 3.6$  Hz, 1H), 3.29 (dd,  $J = 13.1, 8.9$  Hz, 1H), 2.25 (s, 3H);  **$^{13}\text{C NMR}$**  (126 MHz,  $\text{CDCl}_3$ )  $\delta$  145.24, 142.11, 137.56, 130.62, 128.54, 127.86, 125.88, 117.37, 111.64, 109.71, 72.53, 55.64, 51.87, 21.12.

**HPLC** (CHIRALPAK<sup>®</sup>AD-H elute: *n*-Hexane/*i*-PrOH = 90/10, detector: 210–280 nm, flow rate: 1.0 mL/min);  $t_{\text{major}} = 20.67$  min,  $t_{\text{minor}} = 22.31$  min.

### (-) 1-phenyl-2-(*p*-tolylamino) ethan-1-ol [D9]

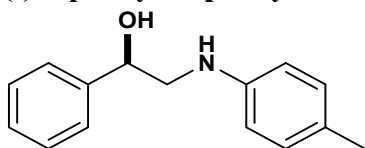

In 15 ml of pressure tube cylinder prepared 1 mmol of 2-bromoacetophenone (A1) taken along with 1 mmol of *p*-toluidine and 1 mol% of catalyst Ru-Teth-TsDPEN (*R, R*) which was then dissolved in 4 mL of DCM along with the addition of 1 mmol of  $\text{NaHCO}_3$ . After 15 min, 1 mmol of DMAB is added under nitrogen atmosphere and the synthesis of product determined by repeated checking with Thin Layer Chromatography (TLC) further compound is extracted with DCM and water, after this organic layer is dried over anhydrous  $\text{Na}_2\text{SO}_4$  filtered and solvent removed under vacuum on rotary evaporator. Final mixture then purified using silica-gel column chromatography (eluent: *n*-hexane-ethyl acetate, 90-10) to obtain pure (-)-1-phenyl-2-(*p*-tolylamino) ethan-1-ol.

Colourless liquid; Yield = 218 mg (96%), (1.85: 98.15 %er, 96% ee);  $R_f = 0.59$  (*n*-hexane: ethyl acetate, 25

90:10 v/v);  $[\alpha]_D^{25} = -45.3$  ( $c = 1.0$  in abs. EtOH)

**MS (EI, 70 eV) m/z (%):** 227 ( $M^{+63}$ ), 121 (100), 91 (65), 77 (30), 65 (30)

**$^1\text{H NMR}$**  (500 MHz,  $\text{CDCl}_3$ )  $\delta$  7.46 – 7.37 (m, 4H), 7.34 (d,  $J = 6.2$  Hz, 1H), 7.02 (d,  $J = 8.1$  Hz, 2H), 6.62 (d,  $J = 8.1$  Hz, 2H), 4.91 (dd,  $J = 8.7, 3.7$  Hz, 1H), 3.41 (dd,  $J = 13.1, 3.7$  Hz, 1H), 3.27 (dd,  $J = 13.1, 8.7$  Hz, 1H), 2.27 (s, 3H);  **$^{13}\text{C NMR}$**  (126 MHz,  $\text{CDCl}_3$ )  $\delta$  145.55, 142.12, 129.83, 128.60, 127.93, 127.46, 125.90, 113.75, 72.40, 52.26, 20.41.

**HPLC** (CHIRALCEL<sup>®</sup>OJ-H elute: *n*-Hexane/*i*-PrOH = 90/10, detector: 210–280 nm, flow rate: 0.5 mL/min);  $t_{\text{major}} = 44.85$  min,  $t_{\text{minor}} = 37.21$  min.

### (-) 2-((3,4-dimethylphenyl) amino)-1-phenylethan-1-ol (D10)

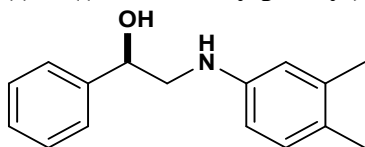

In 15 ml of pressure tube cylinder prepared 1 mmol of 2-bromoacetophenone (A1) taken along with 1 mmol of 3,4-dimethylaniline and 1 mol% of catalyst Ru-Teth-TsDPEN (*R, R*) which was then dissolved in 4 mL of DCM along with the addition of 1 mmol of  $\text{NaHCO}_3$ . After 15 min, 1 mmol of DMAB is added under nitrogen atmosphere and the synthesis of product determined by repeated checking with Thin Layer Chromatography (TLC) further compound is extracted with DCM and water, after this organic layer is dried over anhydrous  $\text{Na}_2\text{SO}_4$  filtered and solvent removed under vacuum on rotary evaporator. Final mixture then purified using silica-gel column chromatography (eluent: *n*-hexane-ethyl acetate, 90-10) to obtain pure (-)-2-((3,4-dimethylphenyl) amino)-1-phenylethan-1-ol.

Yellow liquid; Yield = 221 mg (92%), (5.85: 94.15 %er, 88% ee);  $R_f = 0.56$  (*n*-hexane: ethyl acetate, 25

90:10 v/v);  $[\alpha]_D^{25} = -63.5$  ( $c = 1.0$  in abs. EtOH)

**MS (EI, 70 eV) m/z (%):** 241 ( $M^{+59}$ ), 222 (3), 134 (100), 105 (26), 77 (35)

**$^1\text{H NMR}$**  (500 MHz,  $\text{CDCl}_3$ )  $\delta$  7.36 (dd,  $J = 26.1, 5.4$  Hz, 5H), 6.97 (d,  $J = 7.9$  Hz, 1H), 6.50 (s, 1H), 6.46 (d,  $J = 7.9$  Hz, 1H), 4.88 (dd,  $J = 9.1, 3.2$  Hz, 1H), 3.38 (dd,  $J = 12.9, 3.2$  Hz, 1H), 3.24 (dd,  $J = 12.5, 9.1$  Hz, 1H), 2.21 (s, 3H), 2.18 (s, 3H);  **$^{13}\text{C NMR}$**  (126 MHz,  $\text{CDCl}_3$ )  $\delta$  145.96, 142.18, 137.41, 130.35, 128.59, 127.90, 126.29, 125.90, 115.54, 111.06, 72.41, 52.30, 20.03, 18.71.

**HPLC** (CHIRALPAK<sup>®</sup>AD-H elute: *n*-Hexane/*i*-PrOH = 90/10, detector: 210–280 nm, flow rate: 1.2 mL/min);  $t_{\text{major}} = 15.57$  min,  $t_{\text{minor}} = 12.27$  min.

### (-) 2-((4-fluorophenyl) amino)-1-phenylethan-1-ol (D11)

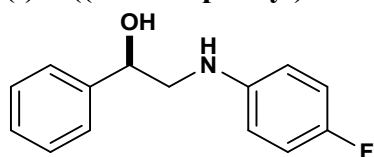

In 15 ml of pressure tube cylinder prepared 1 mmol of 2-bromoacetophenone (A1) taken along with 1 mmol of *p*-fluoroaniline and 1 mol% of catalyst Ru-Teth-TsDPEN (*R, R*) which was then dissolved in 4 mL of DCM along with the addition of 1 mmol of  $\text{NaHCO}_3$ . After 15 min, 1 mmol of DMAB is added under nitrogen atmosphere and the synthesis of product determined by repeated checking with Thin Layer Chromatography (TLC) further compound is extracted with DCM and water, after this organic layer is dried over anhydrous  $\text{Na}_2\text{SO}_4$  filtered and solvent removed under vacuum on rotary evaporator. Final mixture then purified using silica-gel column chromatography (eluent: *n*-hexane-ethyl acetate, 90-10) to obtain pure (-)-2-((4-fluorophenyl) amino)-1-phenylethan-1-ol.

Yellow liquid; Yield = 222 mg (96%), (99.38: 0.62 %er, 99% ee);  $R_f = 0.68$  (*n*-hexane: ethyl acetate, 25

90:10 v/v);  $[\alpha]_D^{25} = -58.3$  ( $c = 1.0$  in abs. EtOH)

**MS (EI, 70 eV) m/z (%):** 231 ( $M^{+29}$ ), 200 (100), 122 (100), 95 (69), 77 (27)

**$^1\text{H NMR}$**  (500 MHz,  $\text{CDCl}_3$ )  $\delta$  7.42 – 7.38 (m, 1H), 7.35 (d,  $J = 4.1$  Hz, 3H), 7.32 – 7.26 (m, 1H), 6.85 (dt,  $J = 50.2, 8.7$  Hz, 2H), 6.55 (ddd,  $J = 13.4, 9.0, 3.4$  Hz, 2H), 4.43 (dd,  $J = 7.2, 4.1$  Hz, 1H), 3.93 (dd,  $J = 11.1, 4.1$  Hz, 1H), 3.74 (dd,  $J = 11.1, 7.2$  Hz, 1H);  **$^{13}\text{C NMR}$**  (126 MHz,  $\text{CDCl}_3$ )  $\delta$  157.13, 154.79, 143.49, 143.47, 139.84, 128.85, 128.65, 128.07, 127.69, 126.68, 125.84, 115.84, 115.65, 115.62, 115.43, 114.73, 114.66, 114.41, 114.34, 72.44, 67.33, 60.46, 52.42.

**HPLC** (CHIRALPAK<sup>®</sup>AD-H elute: *n*-Hexane/*i*-PrOH = 90/10, detector: 210–280 nm, flow rate: 1.0 mL/min);  $t_{\text{major}} = 15.77$  min,  $t_{\text{minor}} = 16.45$  min.

### (-) 2-((4-chlorophenyl) amino)-1-phenylethan-1-ol (D12)

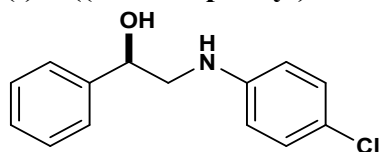

In 15 ml of pressure tube cylinder prepared 1 mmol of 2-bromoacetophenone (A1) taken along with 1 mmol of *p*-chloroaniline and 1 mol% of catalyst Ru-Teth-TsDPEN (*R, R*) which was then dissolved in 4 mL of DCM along with the addition of 1 mmol of  $\text{NaHCO}_3$ . After 15 min., 1 mmol of DMAB is added under nitrogen atmosphere and the synthesis of product determined by repeated checking with

Thin Layer Chromatography (TLC) further compound is extracted with DCM and water, after this organic layer is dried over anhydrous Na<sub>2</sub>SO<sub>4</sub> filtered and solvent removed under vacuum on rotary evaporator. Final mixture then purified using silica-gel column chromatography (eluent: *n*-hexane-ethyl acetate, 90-10) to obtain pure (-)-2-((4-chlorophenyl) amino)-1-phenylethan-1-ol.

Yellow liquid; Yield = 233 mg (94%), (96.48: 3.52 %er, 93% ee); R<sub>f</sub> = 0.69 (*n*-hexane: ethyl acetate, 25

90:10 v/v); [α]<sup>D</sup> = -56.0 (*c* = 1.0 in abs. EtOH)

**MS (EI, 70 eV) m/z (%):** 247 (M<sup>+</sup>57), 249 (19), 141 (100), 105 (25), 77 (46)

**<sup>1</sup>H NMR** (500 MHz, CDCl<sub>3</sub>) δ 7.45 – 7.37 (m, 4H), 7.36 – 7.30 (m, 1H), 7.13 (dd, *J* = 6.8, 2.1 Hz, 2H), 6.58 (d, *J* = 8.7 Hz, 2H), 4.91 (dd, *J* = 8.2, 3.7 Hz, 1H), 3.38 (dd, *J* = 12.9, 3.7 Hz, 1H), 3.28 (dd, *J* = 12.9, 8.6 Hz, 1H); **<sup>13</sup>C NMR** (126 MHz, CDCl<sub>3</sub>) δ 146.47, 141.84, 129.13, 128.69, 128.15, 125.86, 122.60, 114.48, 72.47, 51.73.

**HPLC** (CHIRALPAK<sup>®</sup>AD-H elute: *n*-Hexane/*i*-PrOH = 90/10, detector: 210–280 nm, flow rate: 0.8 mL/min); t<sub>major</sub> = 27.64 min, t<sub>minor</sub> = 34.08 min.

### (-) 2-((4-bromophenyl) amino)-1-phenylethan-1-ol (D13)

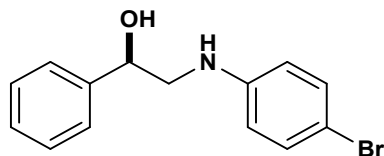

In 15 ml of pressure tube cylinder prepared 1 mmol of 2-bromoacetophenone (A1) taken along with 1.2 mmol of *p*-bromoaniline and 1 mol% of catalyst Ru-Teth-TsDPEN (*R, R*) which was then dissolved in 4 mL of DCM along with the addition of 1.5 mmol of NaHCO<sub>3</sub>. After 15 min. 1 mmol of DMAB is added under nitrogen atmosphere and the synthesis of product determined by repeated checking with Thin Layer Chromatography (TLC) further compound is extracted with DCM and water, after this organic layer is dried over anhydrous Na<sub>2</sub>SO<sub>4</sub> filtered and solvent removed under vacuum on rotary evaporator. Final mixture then purified using silica-gel column chromatography (eluent: *n*-hexane-ethyl acetate, 90-10) to obtain pure (-)-2-((4-bromophenyl) amino)-1-phenylethan-1-ol.

Yellow liquid; Yield = 271 mg (93%), (97.07: 2.93 %er, 94% ee); R<sub>f</sub> = 0.69 (*n*-hexane: ethyl acetate, 25

90:10 v/v); [α]<sup>D</sup> = -54.0 (*c* = 1.0 in abs. EtOH)

**MS (EI, 70 eV) m/z (%):** 291/293 (M<sup>+</sup>26), 184/186 (100), 105 (49), 77 (24)

**<sup>1</sup>H NMR** (500 MHz, CDCl<sub>3</sub>) δ 7.39 (d, *J* = 4.0 Hz, 4H), 7.36 – 7.31 (m, 1H), 7.26 (d, *J* = 8.5 Hz, 2H), 6.53 (d, *J* = 8.5 Hz, 2H), 4.89 (dd, *J* = 8.1, 3.6 Hz, 1H), 3.37 (dd, *J* = 12.9, 3.6 Hz, 1H), 3.27 (dd, *J* = 12.9, 8.6 Hz, 1H); **<sup>13</sup>C NMR** (126 MHz, CDCl<sub>3</sub>) δ 146.90, 141.83, 132.00, 128.70, 128.15, 125.86, 114.95, 109.61, 72.44, 51.59.

**HPLC** (CHIRALPAK<sup>®</sup>AD-H elute: *n*-Hexane/*i*-PrOH = 90/10, detector: 210–280 nm, flow rate: 1.0 mL/min); t<sub>major</sub> = 17.50 min, t<sub>minor</sub> = 29.56 min.

### (-) 1-(2,3-dimethoxyphenyl)-2-(*p*-tolylamino) ethan-1-ol [D14]

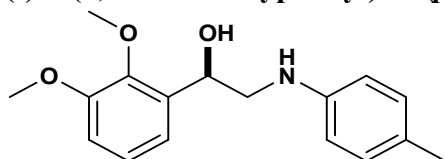

In 15 ml of pressure tube cylinder prepared 1 mmol of 2-bromo-2',3'-dimethoxyacetophenone (II) taken along with 1.2 mmol of *p*-toluidine and 1 mol% of catalyst Ru-Teth-TsDPEN (*R, R*) which was then dissolved in 4 mL of DCM along with the addition of 1.2 mmol of NaHCO<sub>3</sub>. After 15 min., 1 mmol

of DMAB is added under nitrogen atmosphere and the synthesis of product determined by repeated checking with Thin Layer Chromatography (TLC) further compound is extracted with DCM and water, after this organic layer is dried over anhydrous Na<sub>2</sub>SO<sub>4</sub> filtered and solvent removed under vacuum on rotary evaporator. Final mixture then purified using silica-gel column chromatography (eluent: *n*-hexane-ethyl acetate, 90-10) to obtain pure (-)-1-(2,3-dimethoxyphenyl)-2-(*p*-tolylamino)ethan-1-ol.

Colourless liquid; Yield = 270 mg (94%), (98.57: 1.43 %er, 97% ee);  $R_f = 0.62$  (*n*-hexane: ethyl acetate, 25

90:10 v/v);  $[\alpha]_D^{25} = -61.3$  ( $c = 1.0$  in abs. EtOH)

**MS (EI, 70 eV) m/z (%):** 287 (M<sup>+</sup>18), 271 (34), 165 (100), 120 (75), 77 (15)

**<sup>1</sup>H NMR** (500 MHz, CDCl<sub>3</sub>)  $\delta$  7.01 (dd,  $J = 7.2, 5.7$  Hz, 3H), 6.81 (dt,  $J = 8.9, 5.9$  Hz, 2H), 6.65 (d,  $J = 8.4$  Hz, 2H), 5.11 (dd,  $J = 8.8, 3.5$  Hz, 1H), 3.84 (s, 3H), 3.78 (s, 3H), 3.49 (dd,  $J = 13.0, 3.5$  Hz, 1H), 3.20 (dd,  $J = 13.0, 8.8$  Hz, 1H), 2.25 (s, 3H); **<sup>13</sup>C NMR** (126 MHz, CDCl<sub>3</sub>)  $\delta$  153.89, 150.57, 145.78, 131.07, 129.72, 127.02, 113.55, 112.99, 112.94, 111.44, 68.95, 55.79, 55.76, 50.49, 20.36.

**HPLC** (CHIRALPAK®AD-H elute: *n*-Hexane/*i*-PrOH = 90/10, detector: 210–280 nm, flow rate: 1.0 mL/min);  $t_{\text{major}} = 28.24$  min,  $t_{\text{minor}} = 33.80$  min.

### (-)-2-((4-chloro-2-iodophenyl) amino)-1-phenylethan-1-ol (D15)

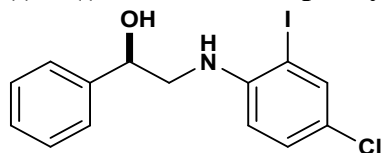

In 15 ml of pressure tube cylinder prepared 1 mmol of 2-bromoacetophenone (A1) taken along with 1.5 mmol of 4-chloro-2-iodoaniline and 1 mol% of catalyst Ru-Teth-TsDPEN (*R, R*) which was then dissolved in 4 mL of DCM along with the addition of 1.5 mmol of NaHCO<sub>3</sub>. After 15 min., 1 mmol of DMAB is added under nitrogen atmosphere and the synthesis of product determined by repeated checking with Thin Layer Chromatography (TLC) further compound is extracted with DCM and water, after this organic layer is dried over anhydrous Na<sub>2</sub>SO<sub>4</sub> filtered and solvent removed under vacuum on rotary evaporator. Final mixture then purified using silica-gel column chromatography (eluent: *n*-hexane-ethyl acetate, 75-25) to obtain pure (-)-2-((4-chloro-2-iodophenyl) amino)-1-phenylethan-1-ol.

Dark Yellow liquid; Yield = 355 mg (95%), (99.34: 0.66 %er, 99% ee);  $R_f = 0.39$  (*n*-hexane: ethyl acetate, 75:25 v/v);  $[\alpha]_D^{25} = -63.5$  ( $c = 1.0$  in abs. EtOH)

**<sup>1</sup>H NMR** (500 MHz, CDCl<sub>3</sub>)  $\delta$  7.62 (d,  $J = 2.3$  Hz, 1H), 7.41 – 7.36 (m, 4H), 7.33 (d,  $J = 5.4$  Hz, 1H), 7.15 (dd,  $J = 8.2, 1.6$  Hz, 1H), 6.50 (d,  $J = 8.7$  Hz, 1H), 4.94 (dd,  $J = 7.3, 3.7$  Hz, 1H), 3.40 (dd,  $J = 12.3, 3.9$  Hz, 1H), 3.32 (dd,  $J = 12.3, 7.3$  Hz, 1H); **<sup>13</sup>C NMR** (126 MHz, CDCl<sub>3</sub>)  $\delta$  145.85, 141.55, 138.00, 129.19, 128.74, 128.26, 125.86, 122.44, 111.23, 85.30, 72.36, 51.80.

**HPLC** (CHIRALPAK®AD-H elute: *n*-Hexane/*i*-PrOH = 90/10, detector: 210–280 nm, flow rate: 1.0 mL/min);  $t_{\text{major}} = 16.27$  min,  $t_{\text{minor}} = 20.32$  min.

### (-)-2-((4-bromo-3-methylphenyl) amino)-1-phenylethan-1-ol (D16)

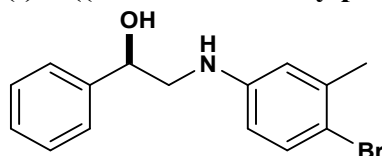

In 15 ml of pressure tube cylinder prepared 1 mmol of 2-bromoacetophenone (A1) taken along with 1.5 mmol of 4-bromo-3-methylaniline and 1 mol% of catalyst Ru-Teth-TsDPEN (*R, R*) which was then

dissolved in 4 mL of DCM along with the addition of 1.5 mmol of NaHCO<sub>3</sub>. After 15 min., 1 mmol of DMAB is added under nitrogen atmosphere and the synthesis of product determined by repeated checking with Thin Layer Chromatography (TLC) further compound is extracted with DCM and water, after this organic layer is dried over anhydrous Na<sub>2</sub>SO<sub>4</sub> filtered and solvent removed under vacuum on rotary evaporator. Final mixture then purified using silica-gel column chromatography (eluent: *n*-hexane-ethyl acetate, 90-10) to obtain pure (-)-2-((4-bromo-3-methylphenyl) amino)-1-phenylethan-1-ol.

Yellow liquid; Yield = 279 mg (91%), (92.78: 7.22 %er, 86% ee); R<sub>f</sub> = 0.62 (*n*-hexane: ethyl acetate, 25

90:10 v/v); [α]<sub>D</sub><sup>25</sup> = -64.0 (*c* = 1.0 in abs. EtOH)

**MS (EI, 70 eV) m/z (%):** 305/307 (M<sup>+</sup>25), 198/200 (100), 122 (81), 77 (11)

**<sup>1</sup>H NMR** (500 MHz, CDCl<sub>3</sub>) δ 7.54 (s, 1H), 7.43 (d, *J* = 6.8 Hz, 1H), 7.29 (d, *J* = 6.8 Hz, 1H), 7.22 (t, *J* = 7.7 Hz, 1H), 7.00 (d, *J* = 8.3 Hz, 2H), 6.59 (d, *J* = 8.3 Hz, 2H), 4.83 (dd, *J* = 8.8, 3.7 Hz, 1H), 3.36 (dd, *J* = 13.2, 3.7 Hz, 1H), 3.19 (dd, *J* = 13.2, 8.8 Hz, 1H), 2.25 (s, 3H); **<sup>13</sup>C NMR** (126 MHz, CDCl<sub>3</sub>) δ 145.23, 144.41, 130.92, 130.14, 129.87, 128.96, 127.74, 124.48, 122.73, 113.78, 71.61, 52.24, 20.42.

**HPLC** (CHIRALCEL®OJ-H elute: *n*-Hexane/*i*-PrOH = 90/10, detector: 210–280 nm, flow rate: 0.8 mL/min); t<sub>major</sub> = 47.81 min, t<sub>minor</sub> = 50.21 min.

### (-)-1-(3-chlorophenyl)-2-(*p*-tolylamino) ethan-1-ol (D17)

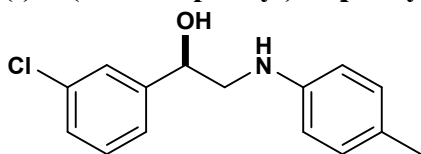

In 15 ml of pressure tube cylinder prepared 1 mmol of 2-bromo-3'-chloroacetophenone (J1) taken along with 1.2 mmol of *p*-toluidine and 1 mol% of catalyst Ru-Teth-TsDPEN (*R,R*) which was then dissolved in 4 mL of DCM along with the addition of 1.4 mmol of NaHCO<sub>3</sub>. After 15 min, 1 mmol of DMAB is added under nitrogen atmosphere and the synthesis of product determined by repeated checking with Thin Layer Chromatography (TLC) further compound is extracted with DCM and water, after this organic layer is dried over anhydrous Na<sub>2</sub>SO<sub>4</sub> filtered and solvent removed under vacuum on rotary evaporator. Final mixture then purified using silica-gel column chromatography (eluent: *n*-hexane-ethyl acetate, 90-10) to obtain pure (-)-1-(3-chlorophenyl)-2-(*p*-tolylamino)ethan-1-ol.

Yellow liquid; Yield = 246 mg (94%), (9.57: 90.43 %er, 81% ee); R<sub>f</sub> = 0.52 (*n*-hexane: ethyl acetate, 25

90:10 v/v); [α]<sub>D</sub><sup>25</sup> = -63.3 (*c* = 1.0 in abs. EtOH)

**MS (EI, 70 eV) m/z (%):** 261 (M<sup>+</sup>11), 120 (100), 91 (9), 77 (15)

**<sup>1</sup>H NMR** (500 MHz, CDCl<sub>3</sub>) δ 7.57 (s, 1H), 7.45 (d, *J* = 8.5 Hz, 1H), 7.31 (d, *J* = 7.6 Hz, 1H), 7.24 (d, *J* = 7.7 Hz, 1H), 7.02 (d, *J* = 7.9 Hz, 2H), 6.61 (d, *J* = 8.8 Hz, 2H), 4.85 (dd, *J* = 8.6, 3.7 Hz, 1H), 3.38 (dd, *J* = 13.3, 3.7 Hz, 1H), 3.21 (dd, *J* = 13.3, 8.8 Hz, 1H), 2.26 (s, 3H); **<sup>13</sup>C NMR** (126 MHz, CDCl<sub>3</sub>) δ 145.27, 144.44, 130.93, 130.14, 129.87, 128.98, 127.74, 124.48, 122.75, 113.80, 71.66, 52.27, 20.40.

**HPLC** (CHIRALPAK®AD-H elute: *n*-Hexane/*i*-PrOH = 90/10, detector: 210–280 nm, flow rate: 1.0 mL/min); t<sub>major</sub> = 17.95 min, t<sub>minor</sub> = 13.15 min.

**(-) 1-(4-chlorophenyl)-2-(*p*-tolylamino) ethan-1-ol (D18)**

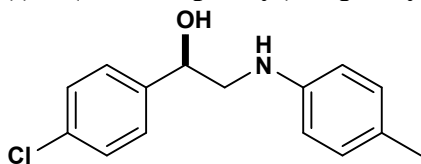

In 15 ml of pressure tube cylinder prepared 1 mmol of 2-bromo-4'-chloroacetophenone (J1) taken along with 1.5 mmol of *p*-toluidine and 1 mol% of catalyst Ru-Teth-TsDPEN (*R, R*) which was then dissolved in 4 mL of DCM along with the addition of 1.5 mmol of NaHCO<sub>3</sub>. After 10 min., 1 mmol of DMAB is added under nitrogen atmosphere and the synthesis of product determined by repeated checking with Thin Layer Chromatography (TLC) further compound is extracted with DCM and water, after this organic layer is dried over anhydrous Na<sub>2</sub>SO<sub>4</sub> filtered and solvent removed under vacuum on rotary evaporator. Final mixture then purified using silica-gel column chromatography (eluent: *n*-hexane-ethyl acetate, 90-10) to obtain pure (-)-1-(4-chlorophenyl)-2-(*p*-tolylamino)ethan-1-ol.

Yellow liquid; Yield = 251 mg (96%), (93.44: 6.56 %er, 87% ee); R<sub>f</sub> = 0.52 (*n*-hexane: ethyl acetate, 25

90:10 v/v); [α]<sub>D</sub><sup>25</sup> = -56.0 (*c* = 1.0 in abs. EtOH)

**MS (EI, 70 eV) m/z (%):** 261 (M<sup>+</sup>19), 120 (100), 91 (15), 65 (9)

**<sup>1</sup>H NMR** (500 MHz, CDCl<sub>3</sub>) δ 7.32 (s, 4H), 7.00 (d, *J* = 7.9 Hz, 2H), 6.59 (d, *J* = 7.9 Hz, 2H), 4.86 (dd, *J* = 8.5, 3.5 Hz, 1H), 3.35 (dd, *J* = 13.2, 3.5 Hz, 1H), 3.20 (dd, *J* = 13.2, 8.5 Hz, 1H), 2.24 (s, 3H); **<sup>13</sup>C NMR** (126 MHz, CDCl<sub>3</sub>) δ 145.33, 140.53, 133.59, 129.85, 128.72, 127.71, 127.24, 113.76, 71.72, 52.29, 20.38.

**HPLC** (CHIRALPAK<sup>®</sup>AD-H elute: *n*-Hexane/*i*-PrOH = 90/10, detector: 210–280 nm, flow rate: 1.0 mL/min); t<sub>major</sub> = 15.27 min, t<sub>minor</sub> = 19.29 min.



**$^1\text{H}$  &  $^{13}\text{C}$ -NMR copy of  $\beta$ -aminol**

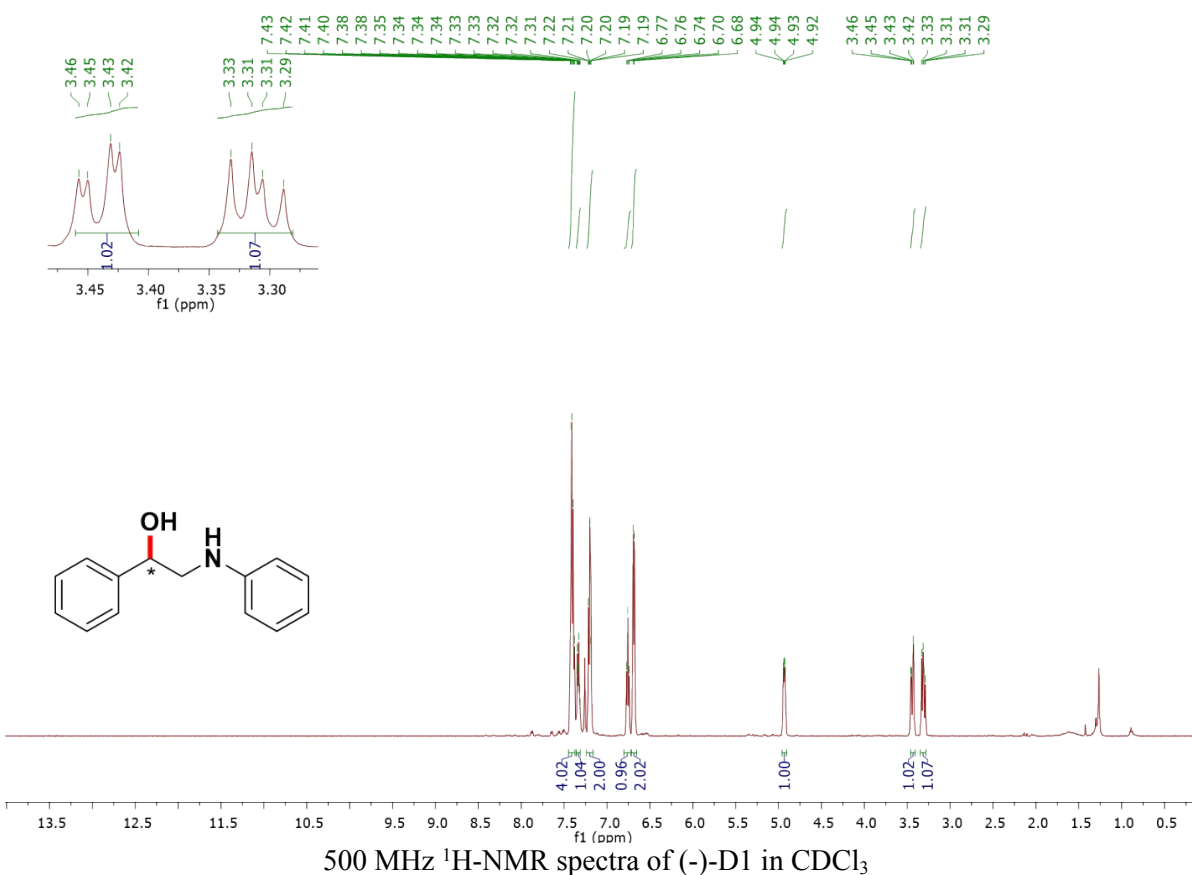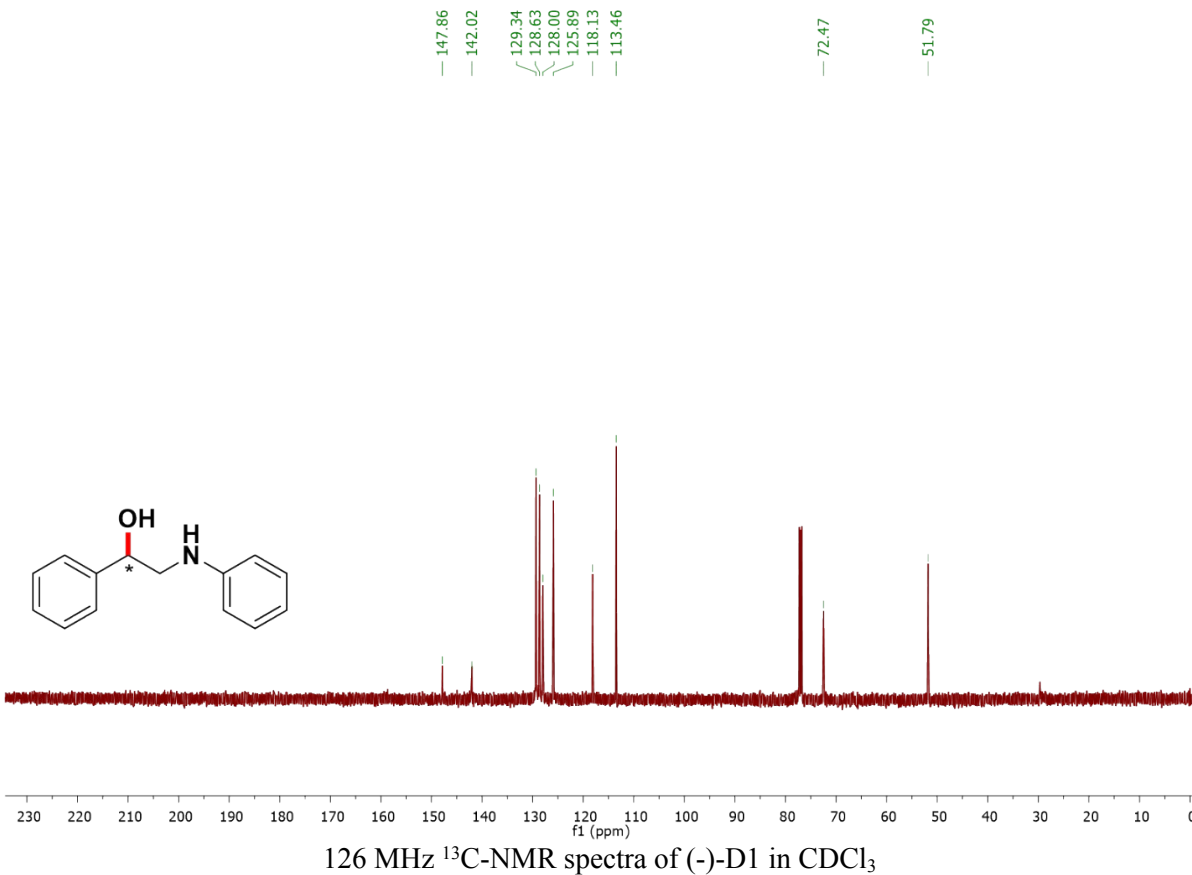

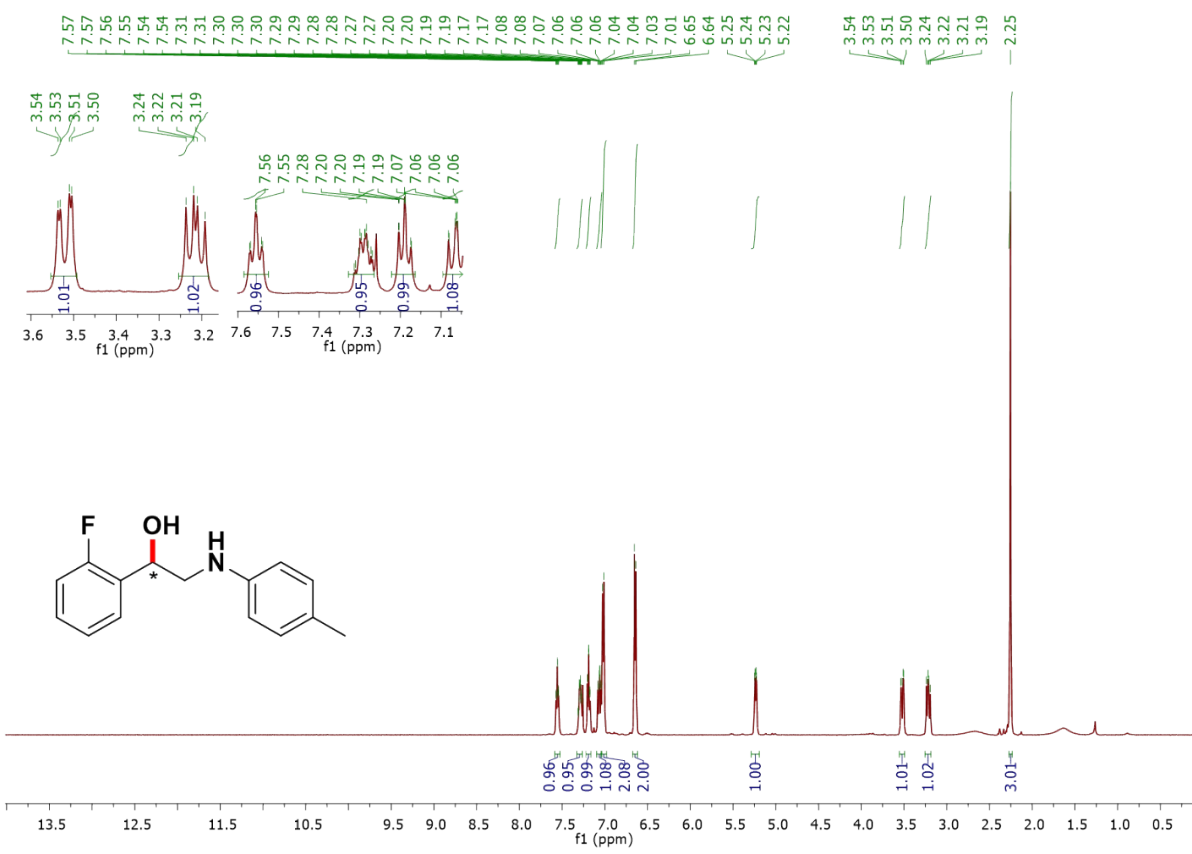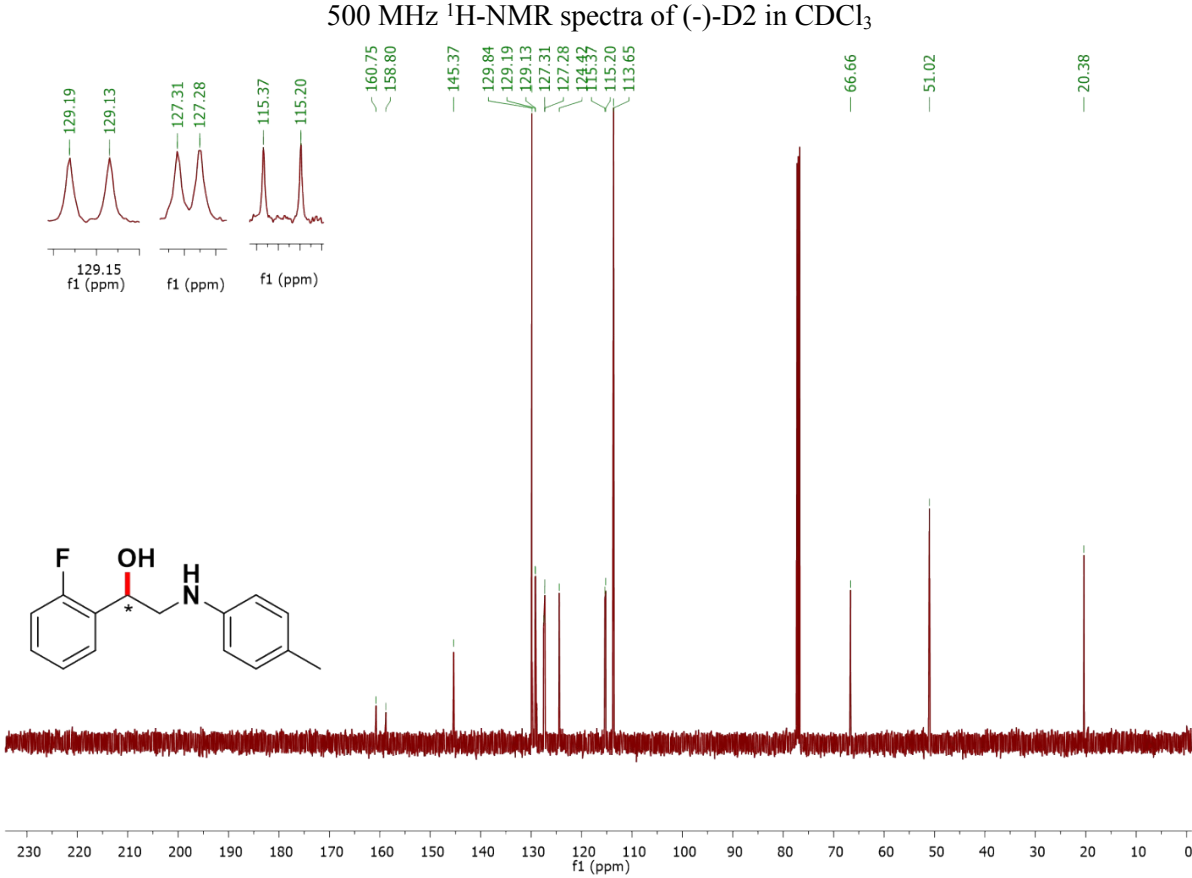

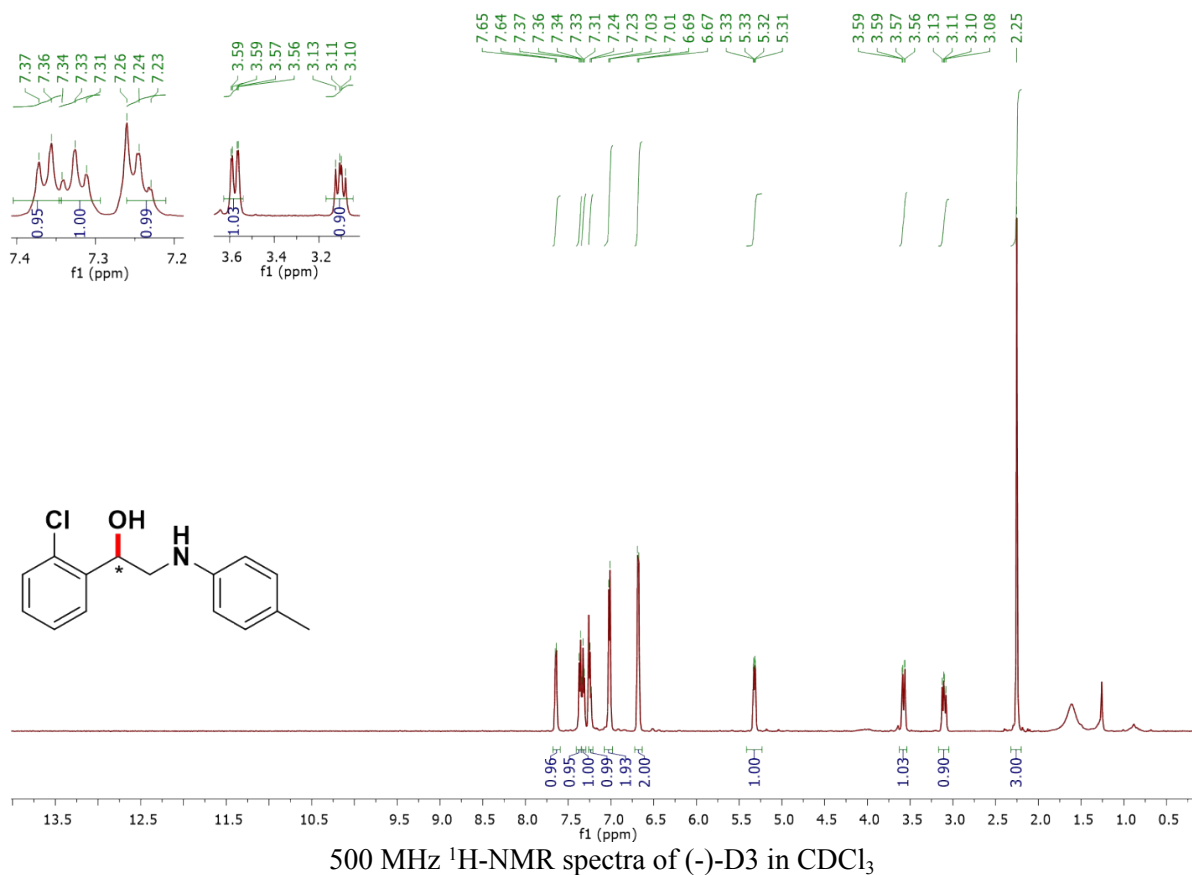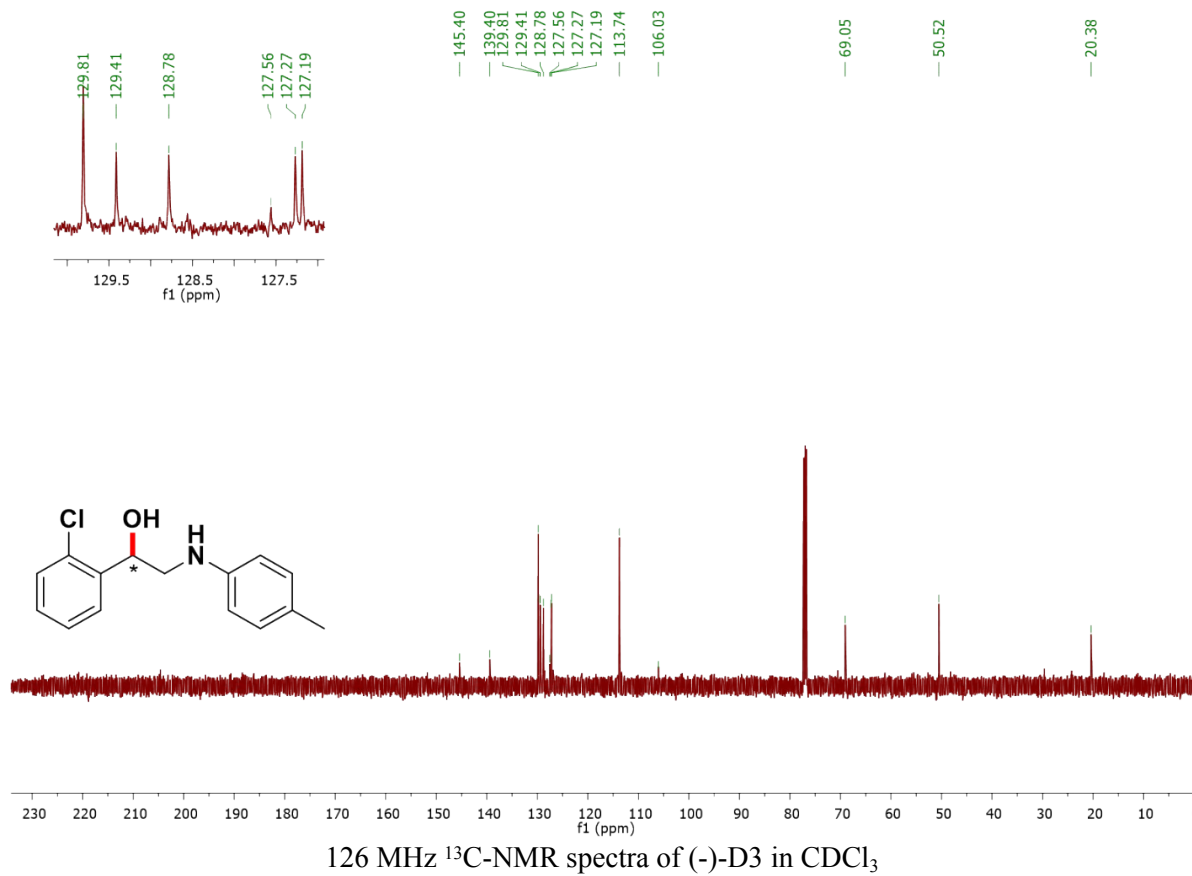

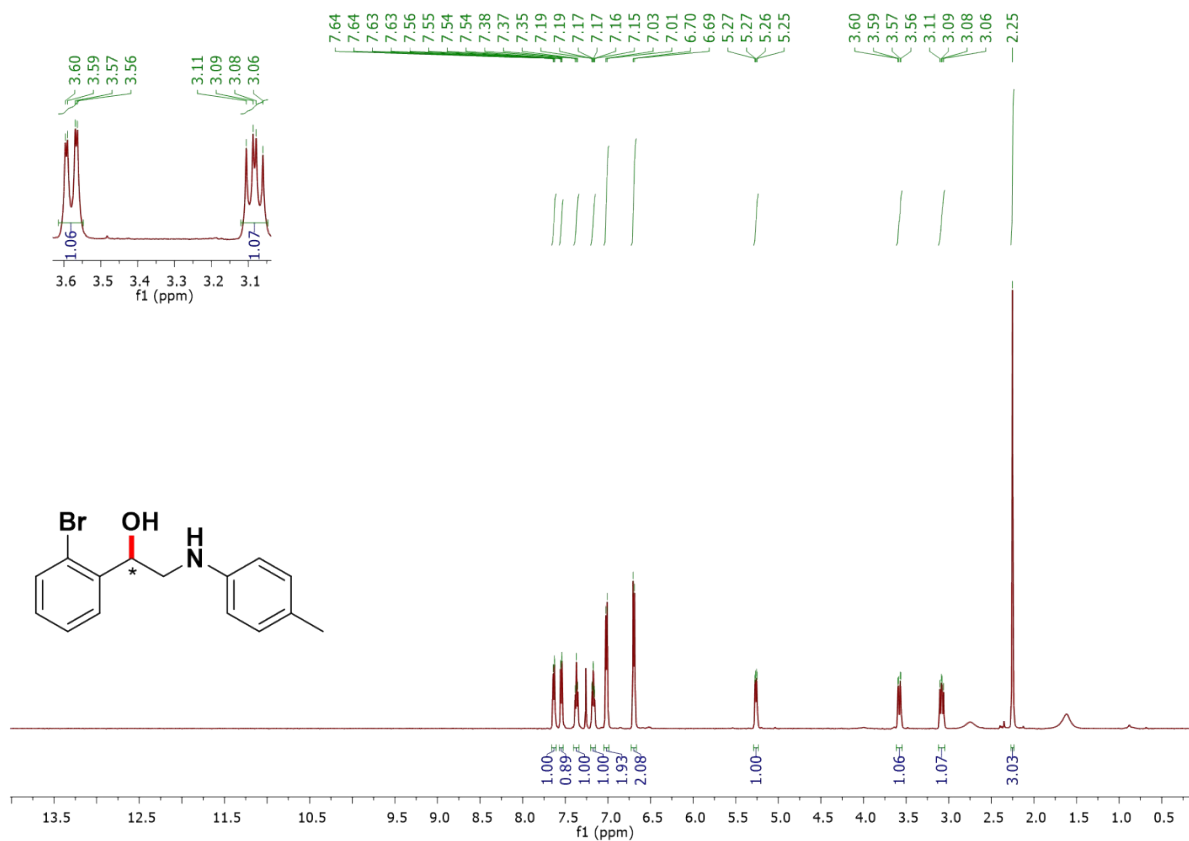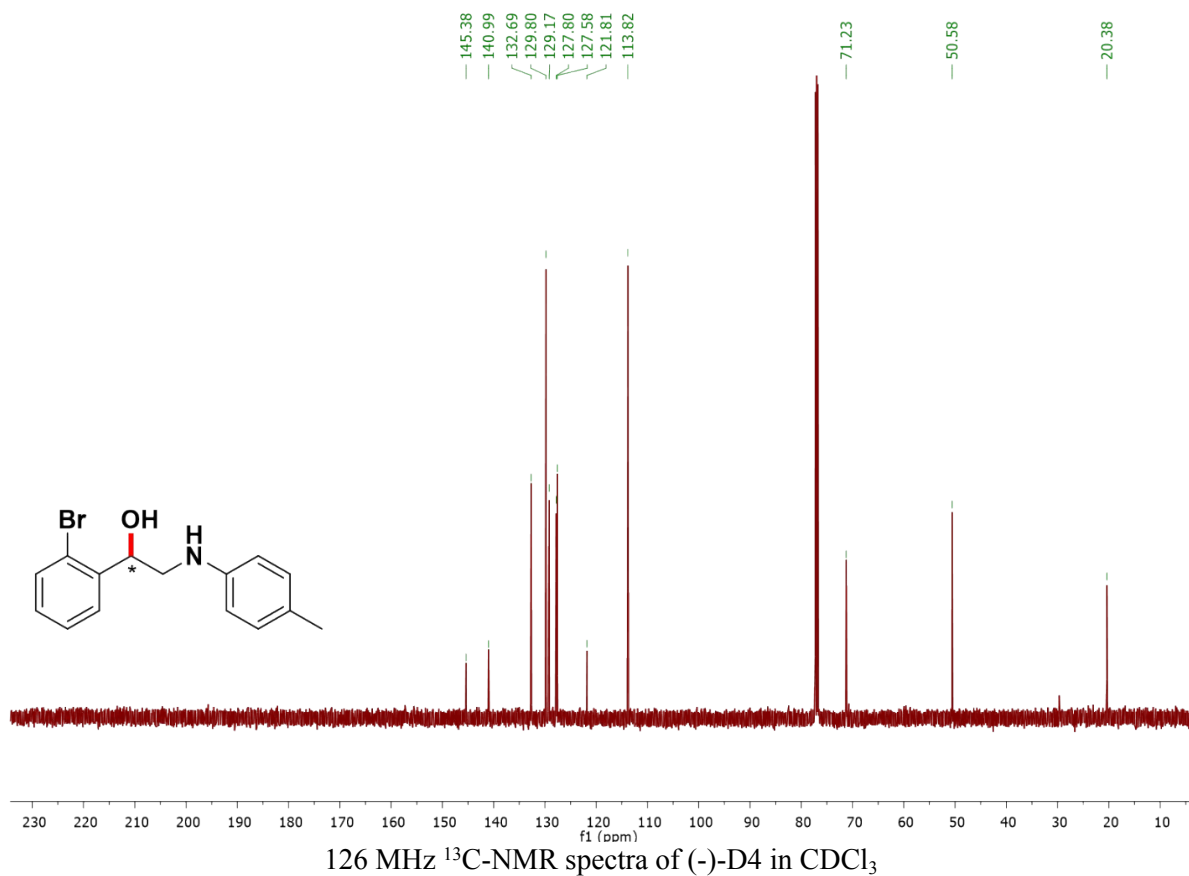

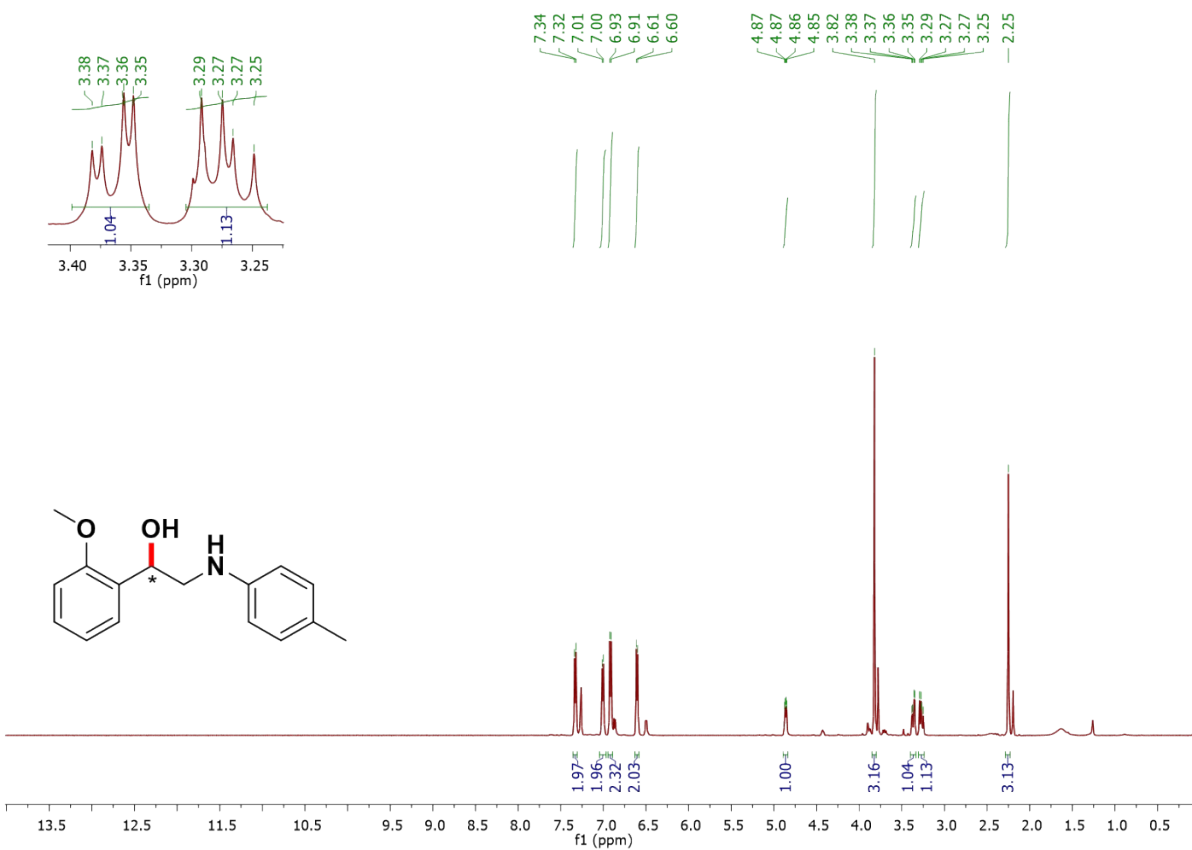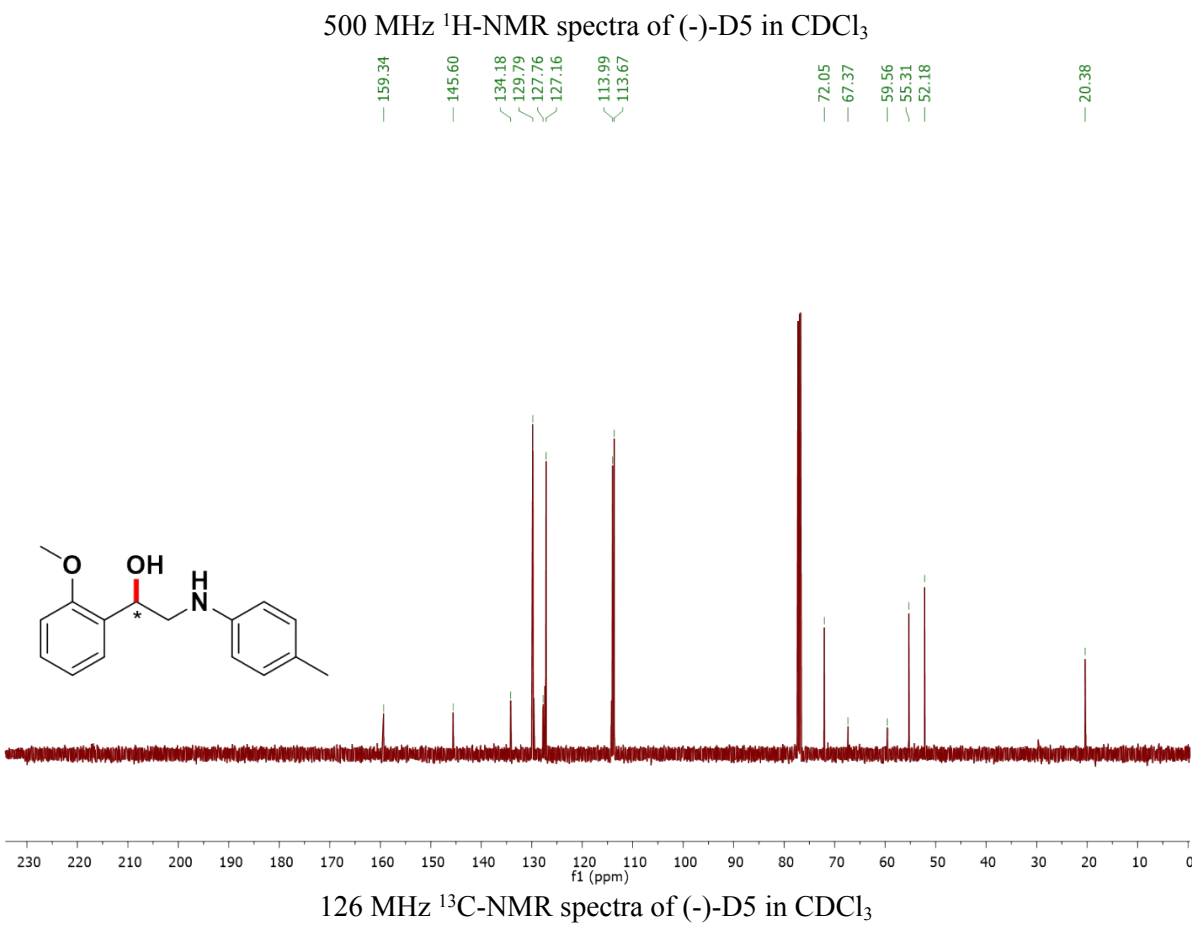

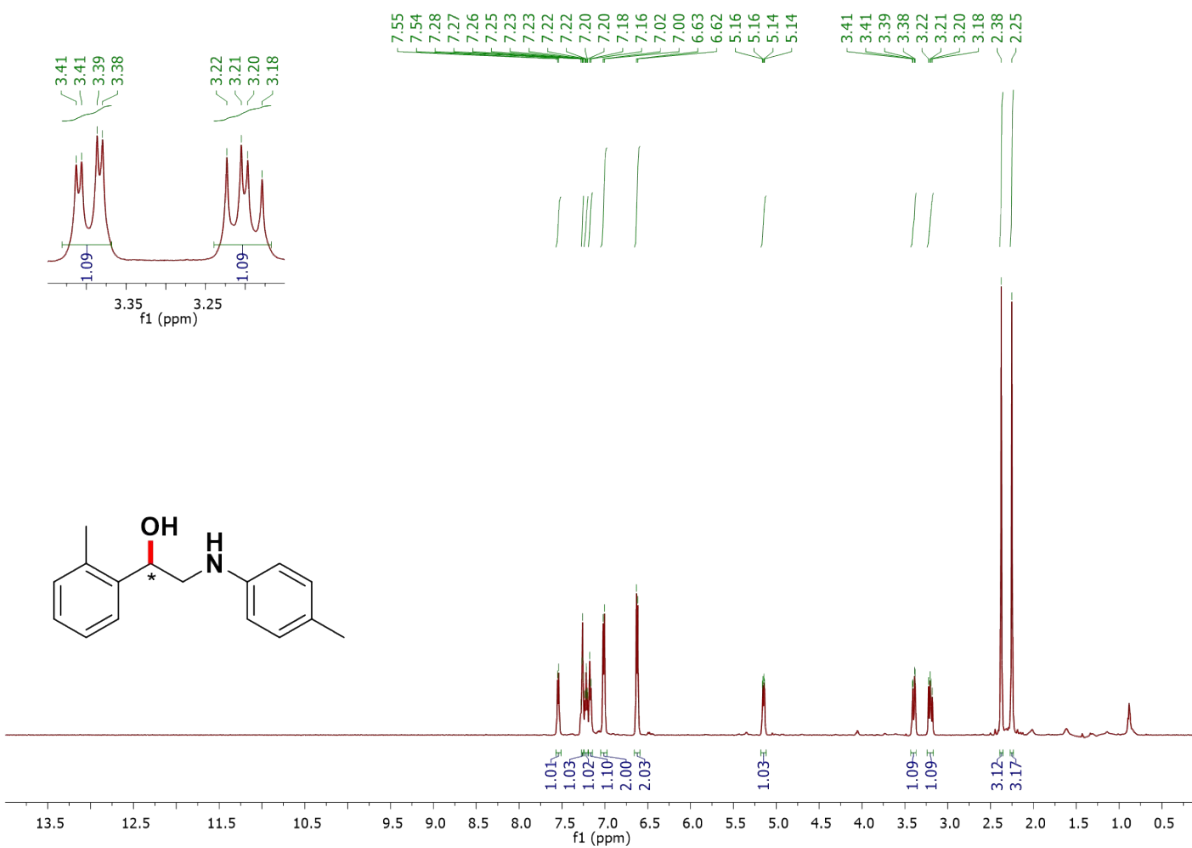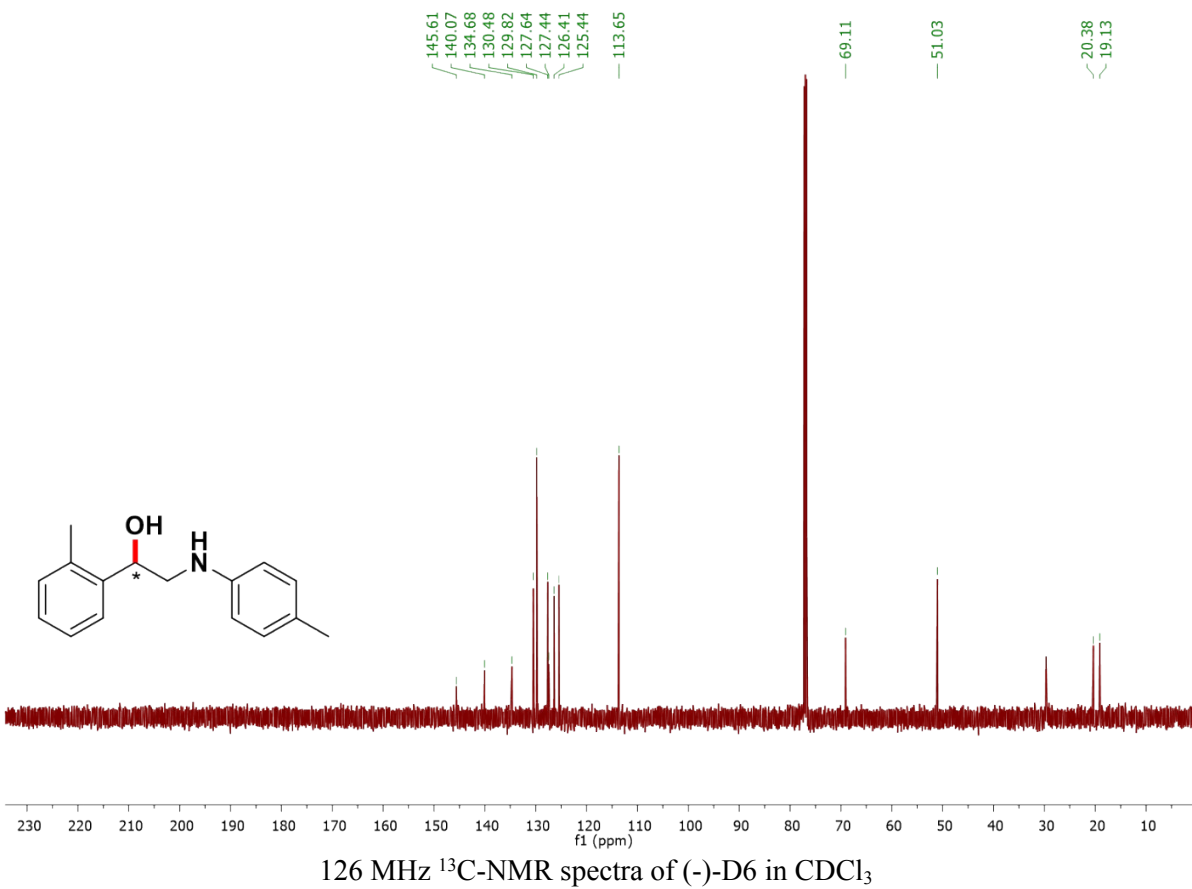

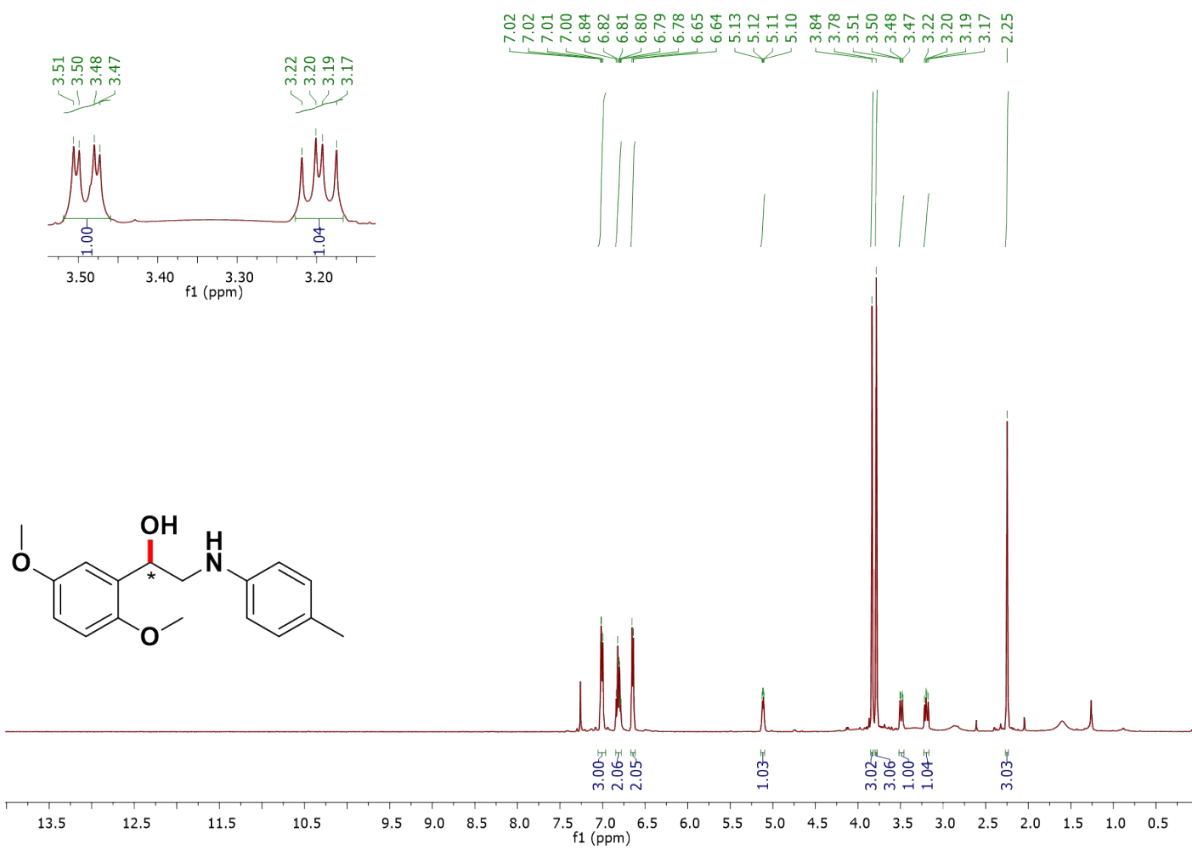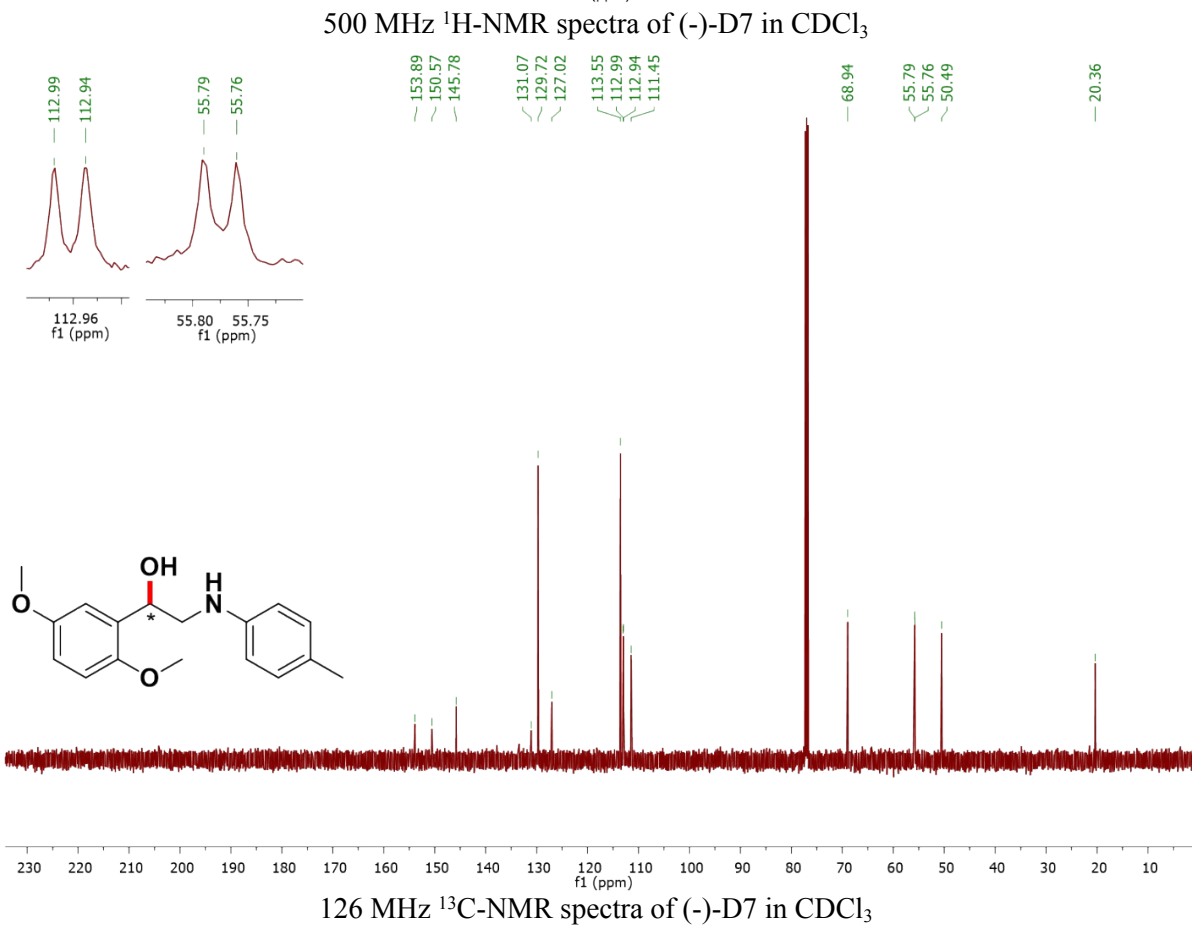

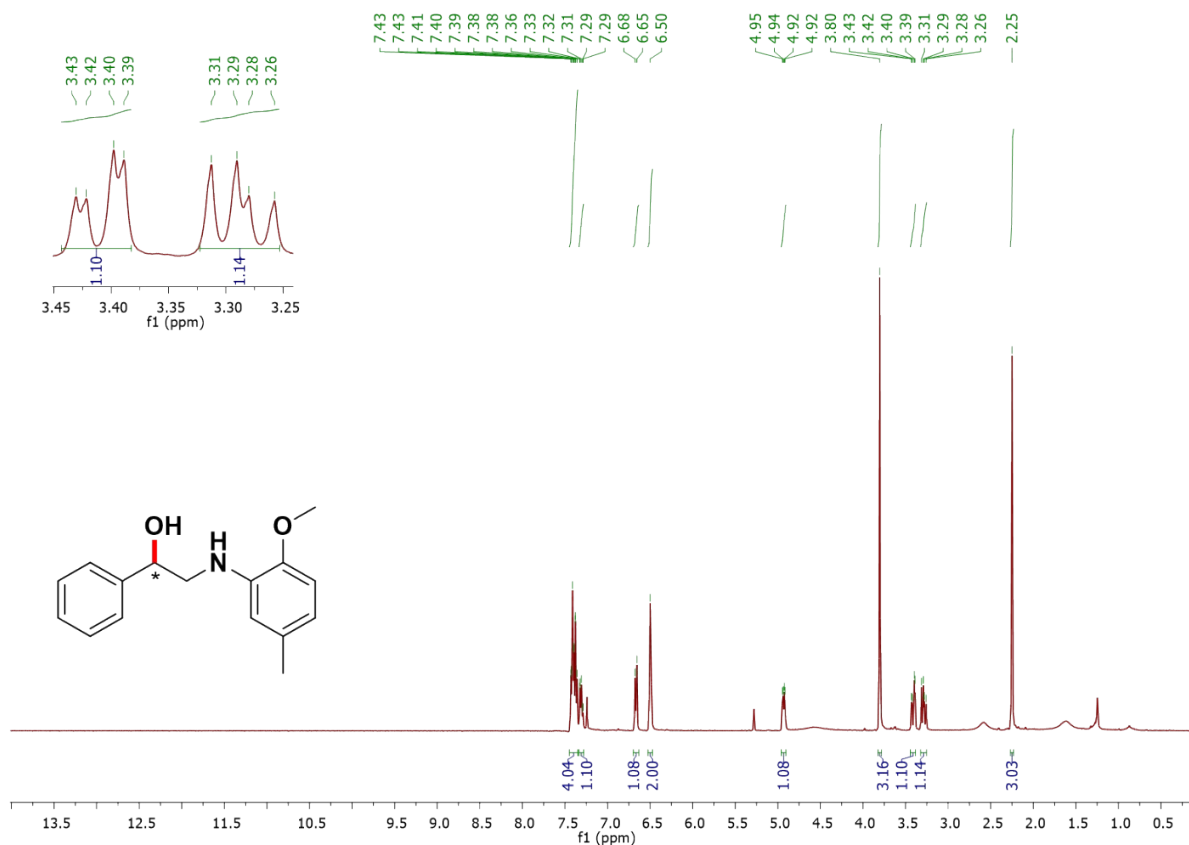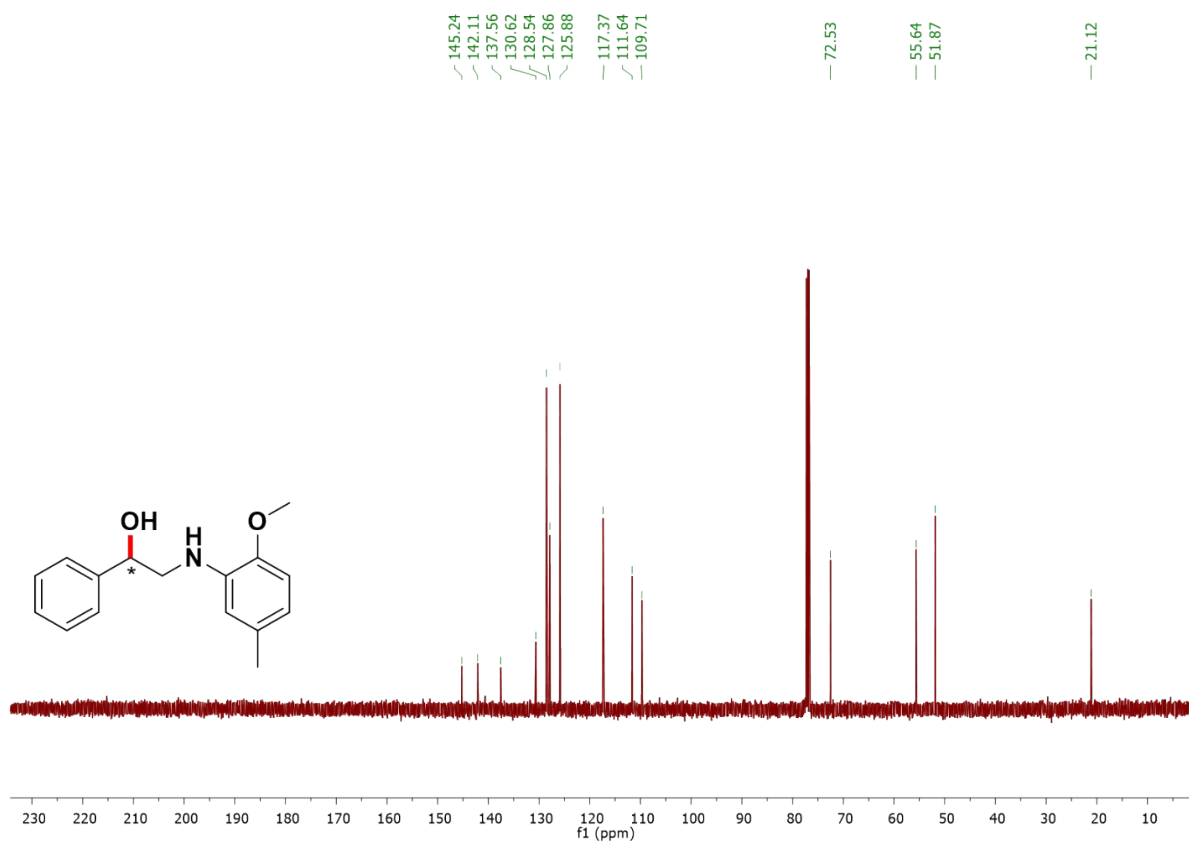



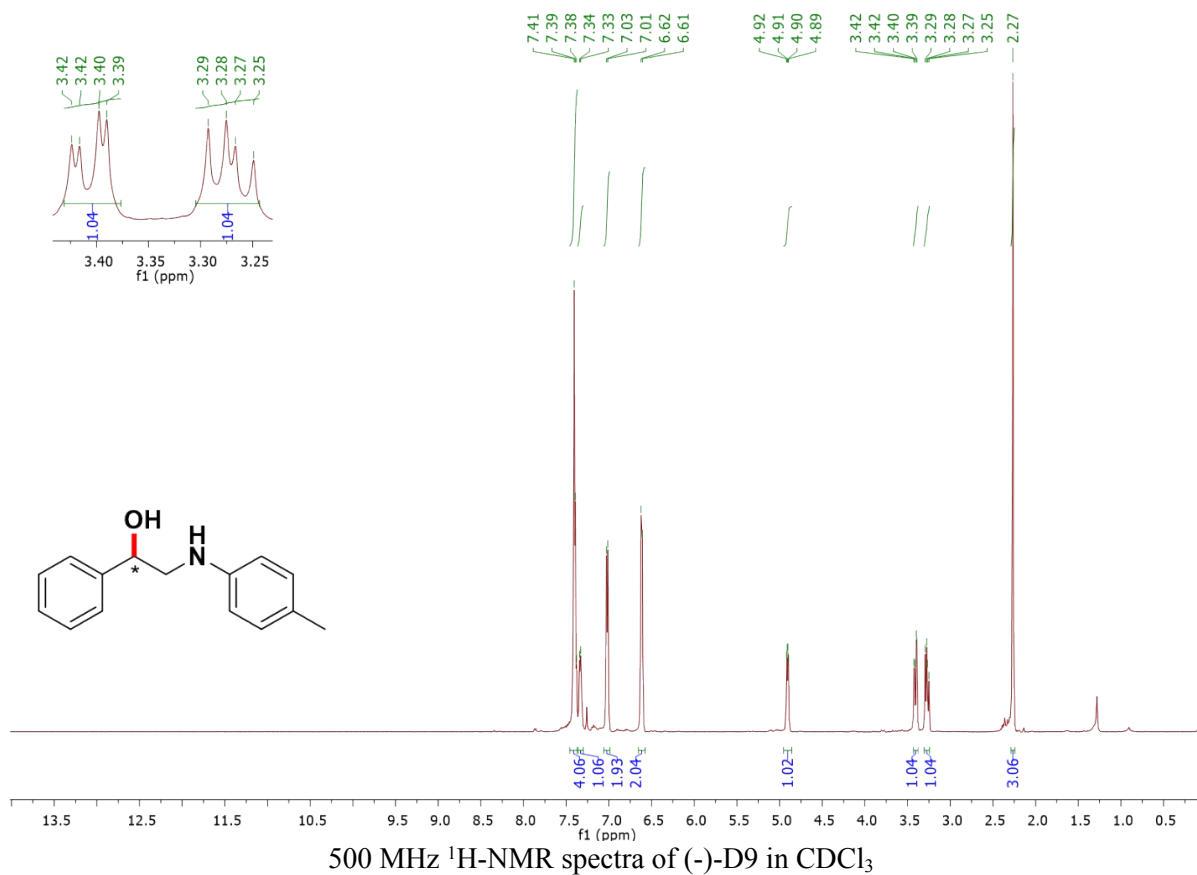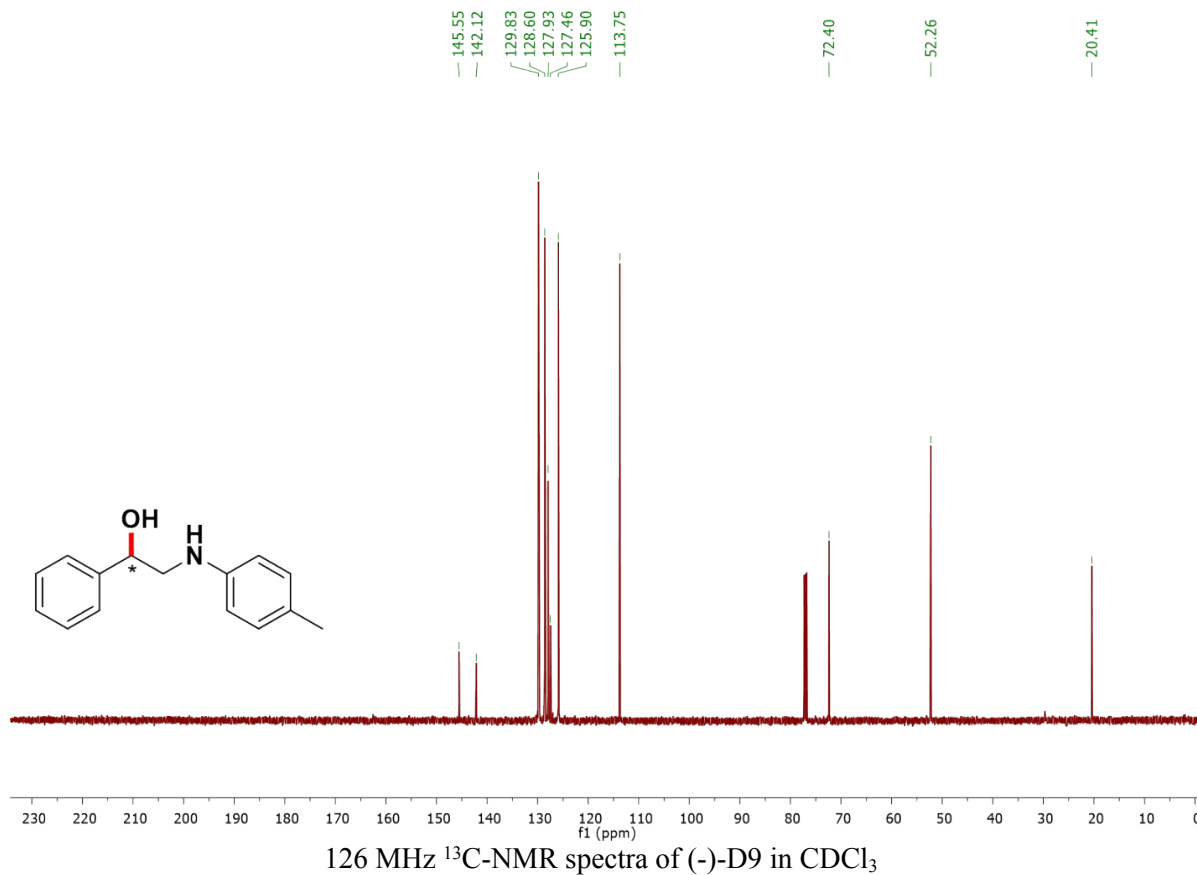

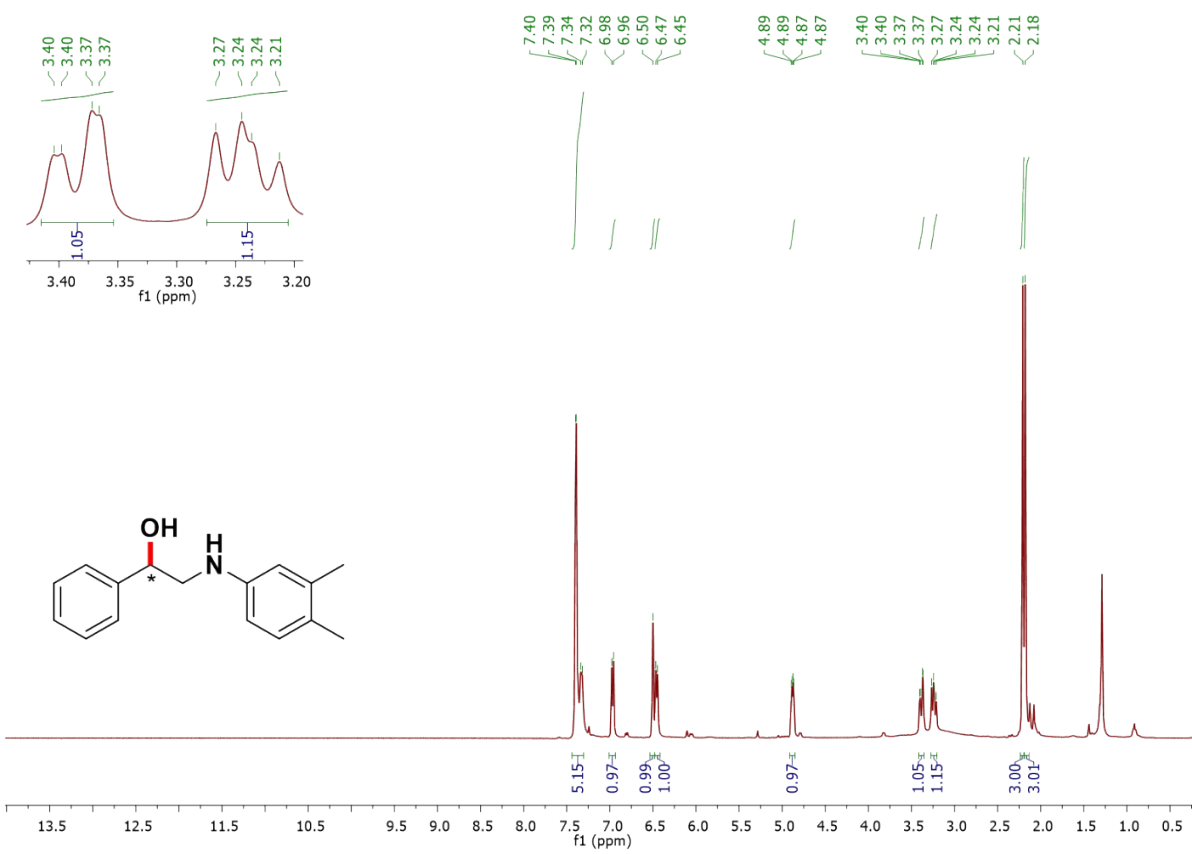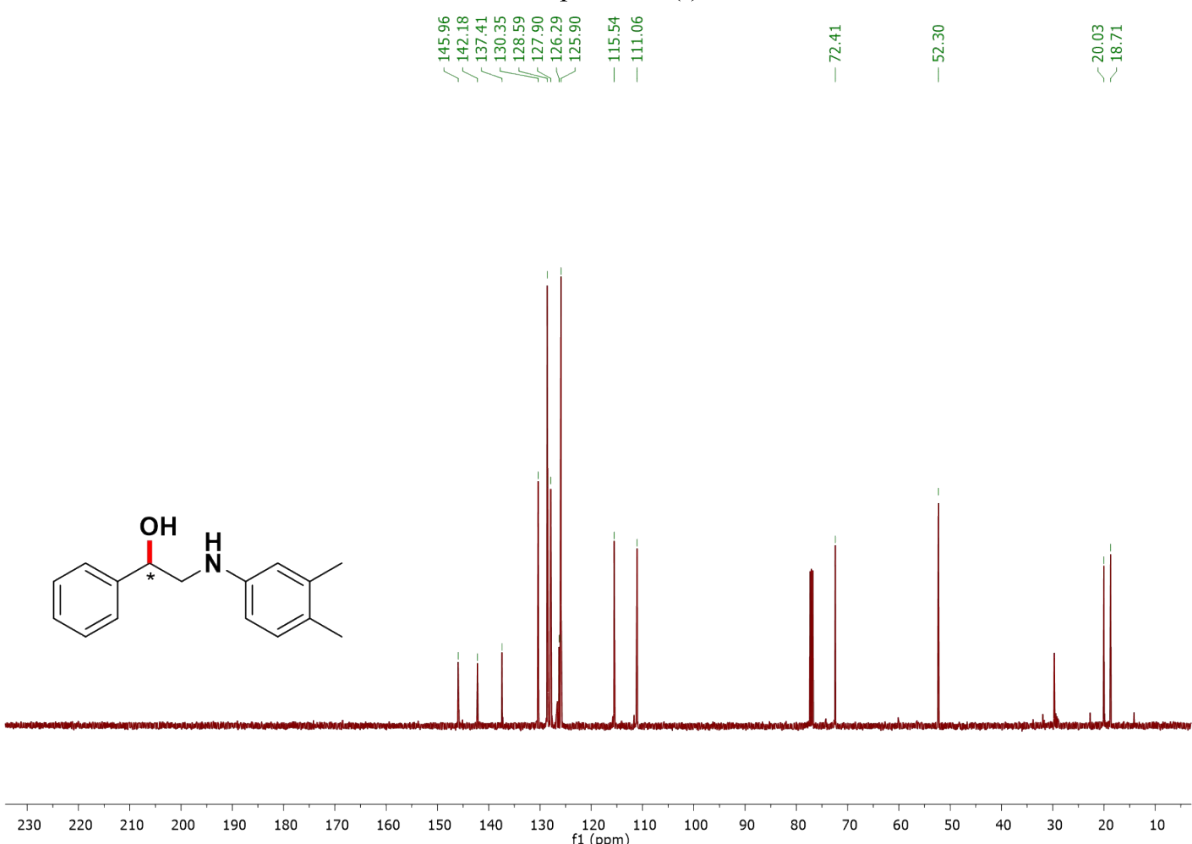

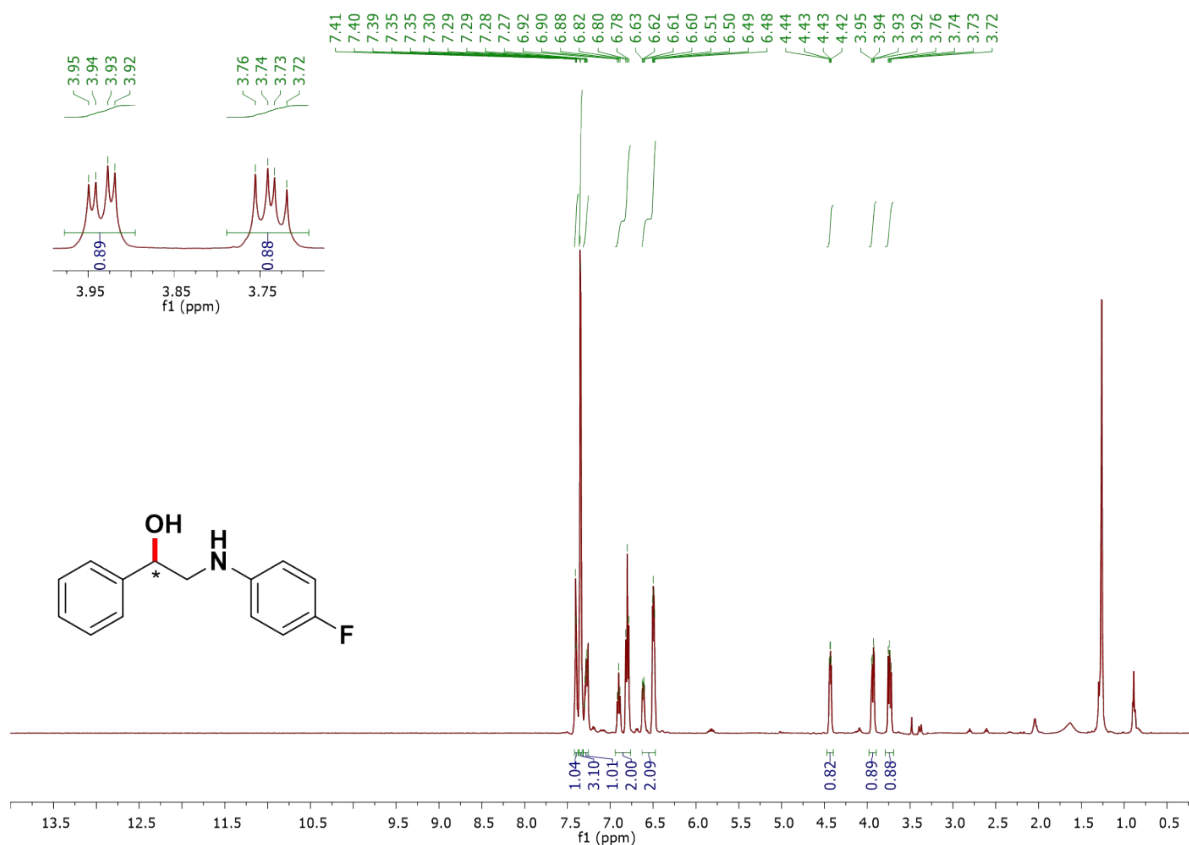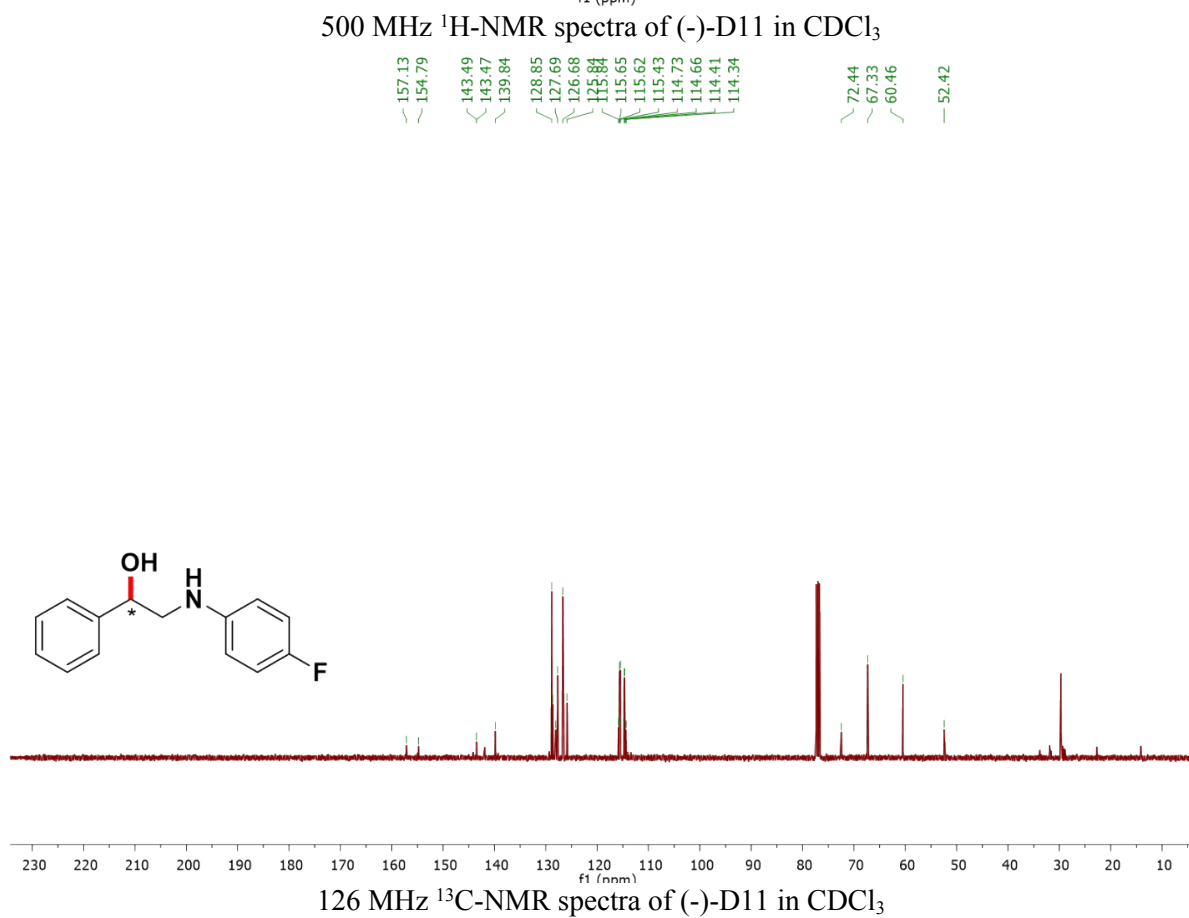

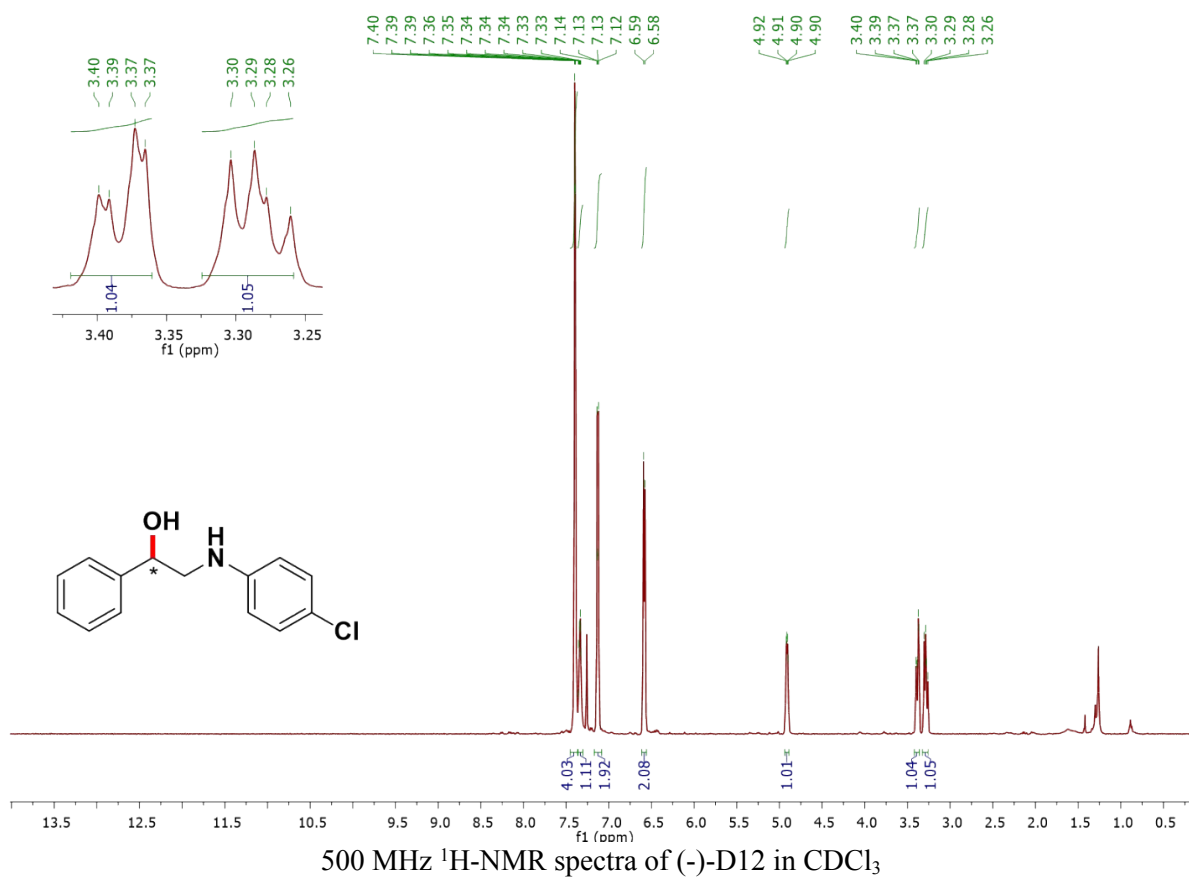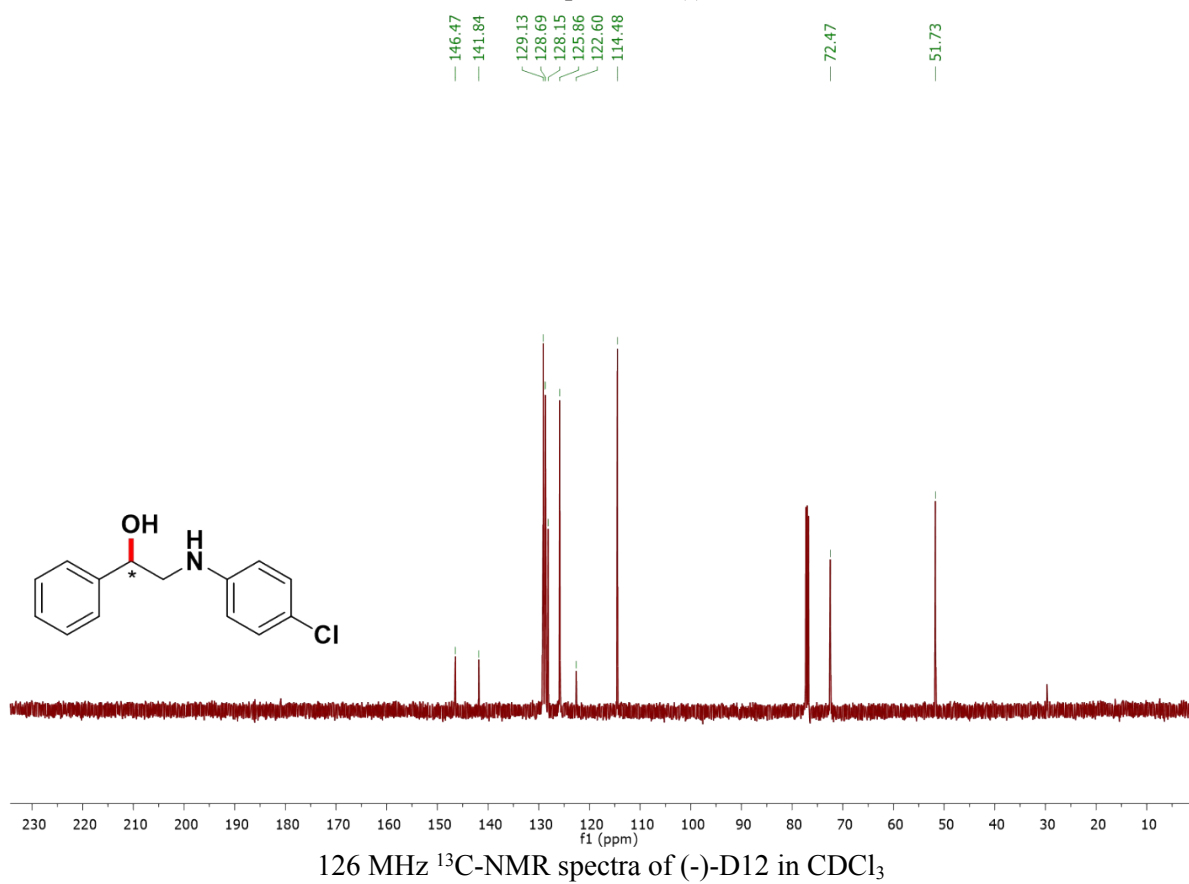

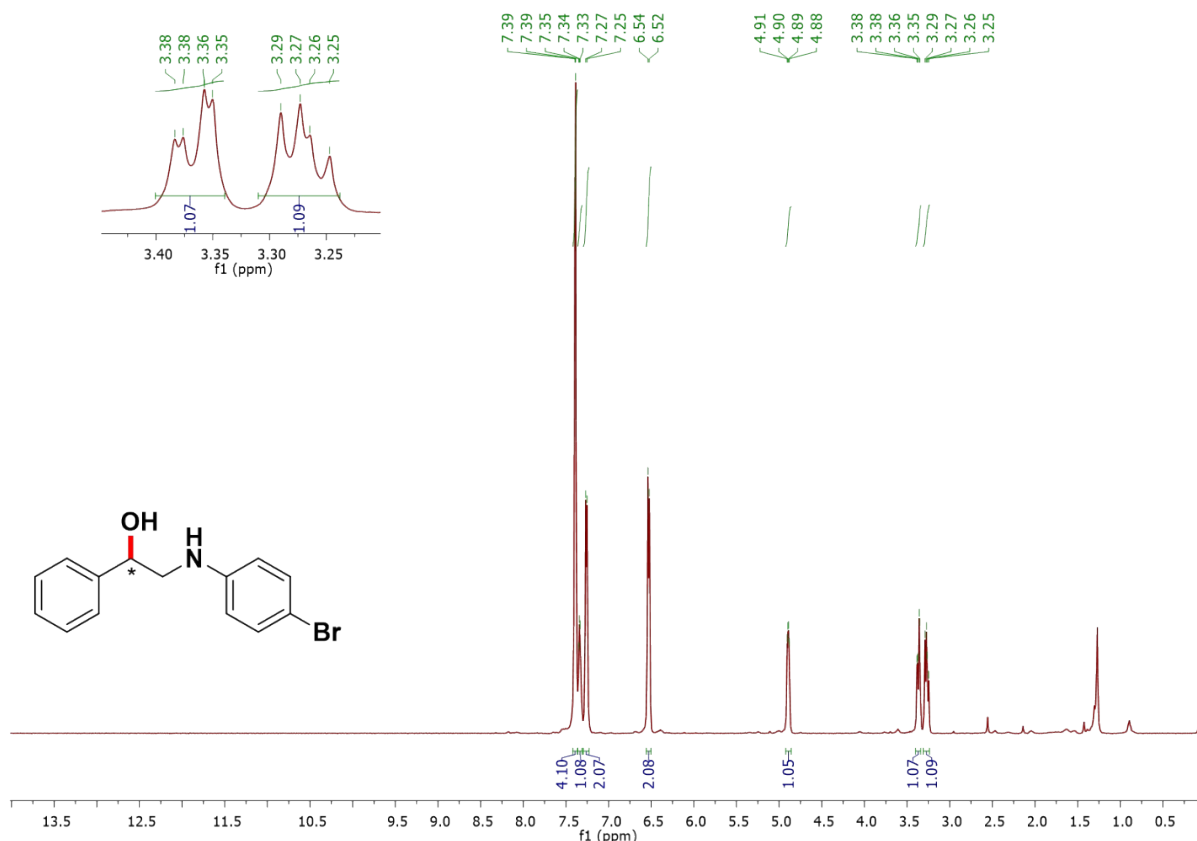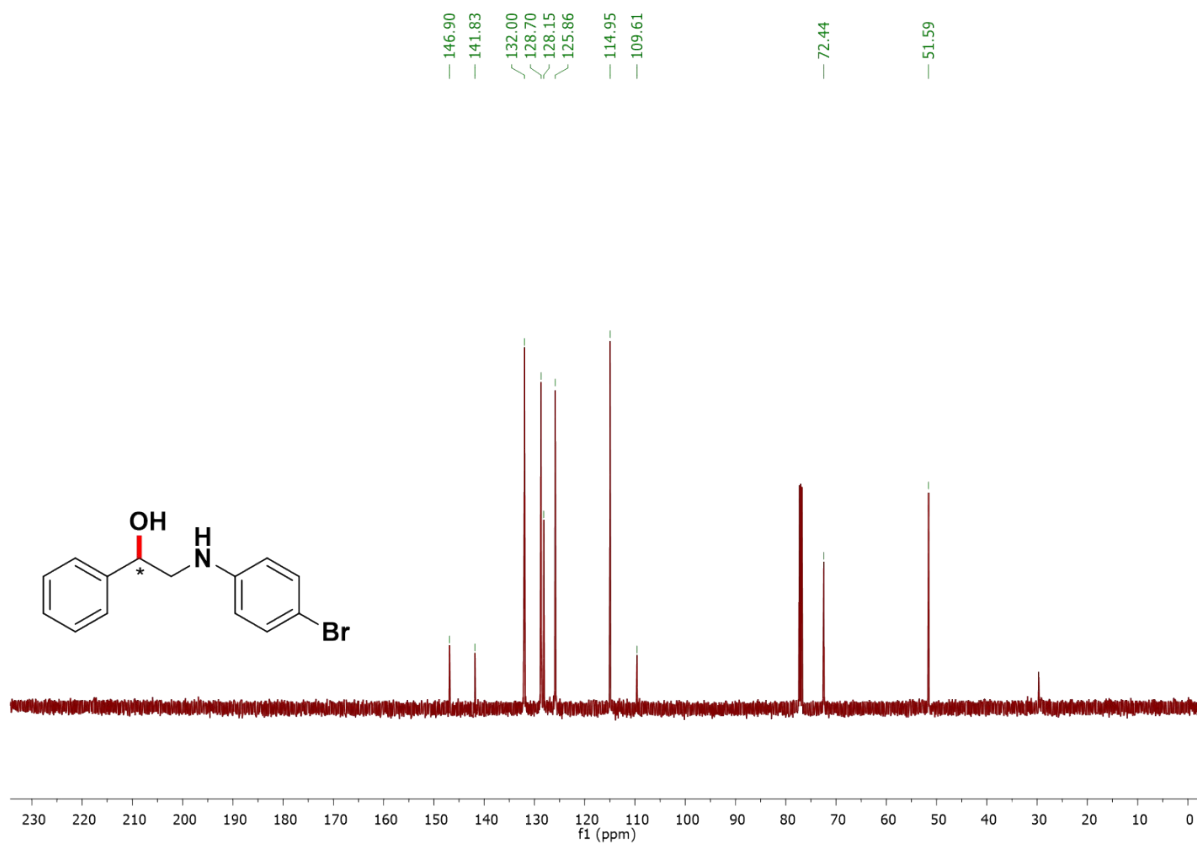

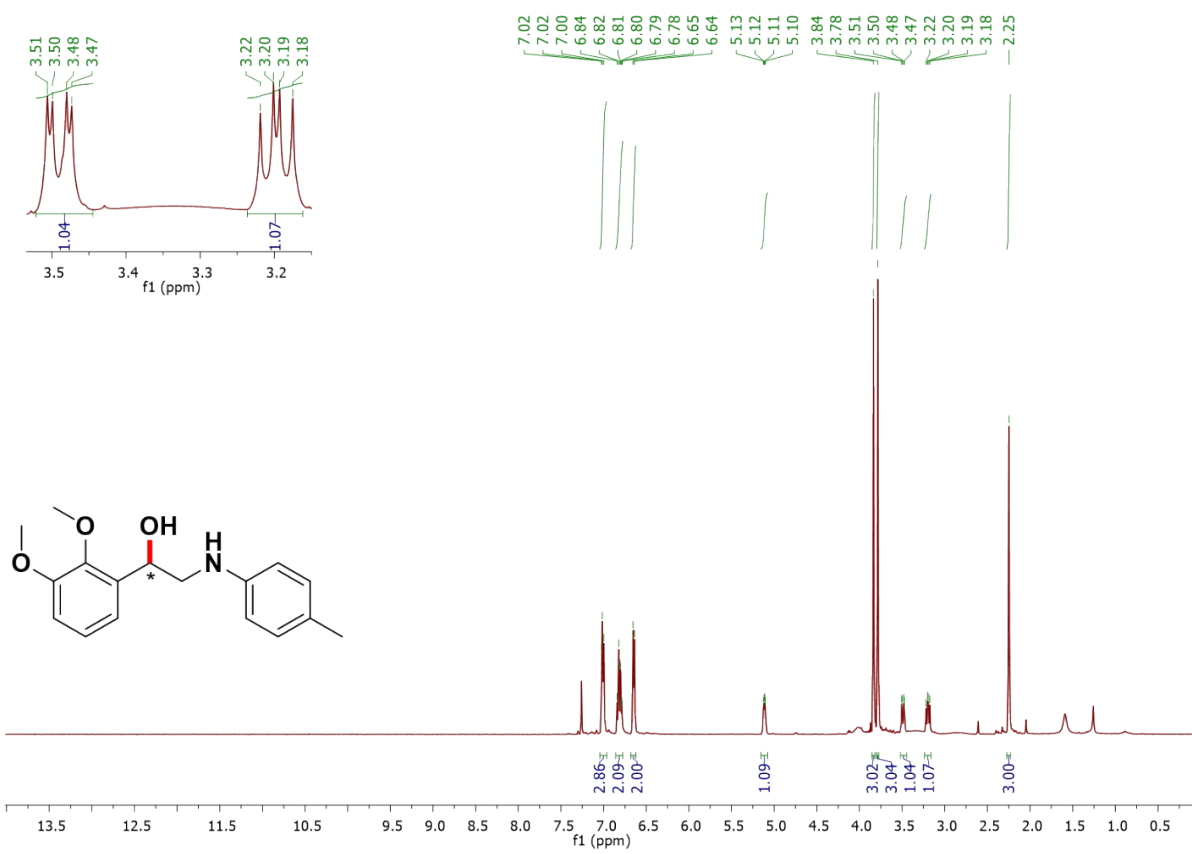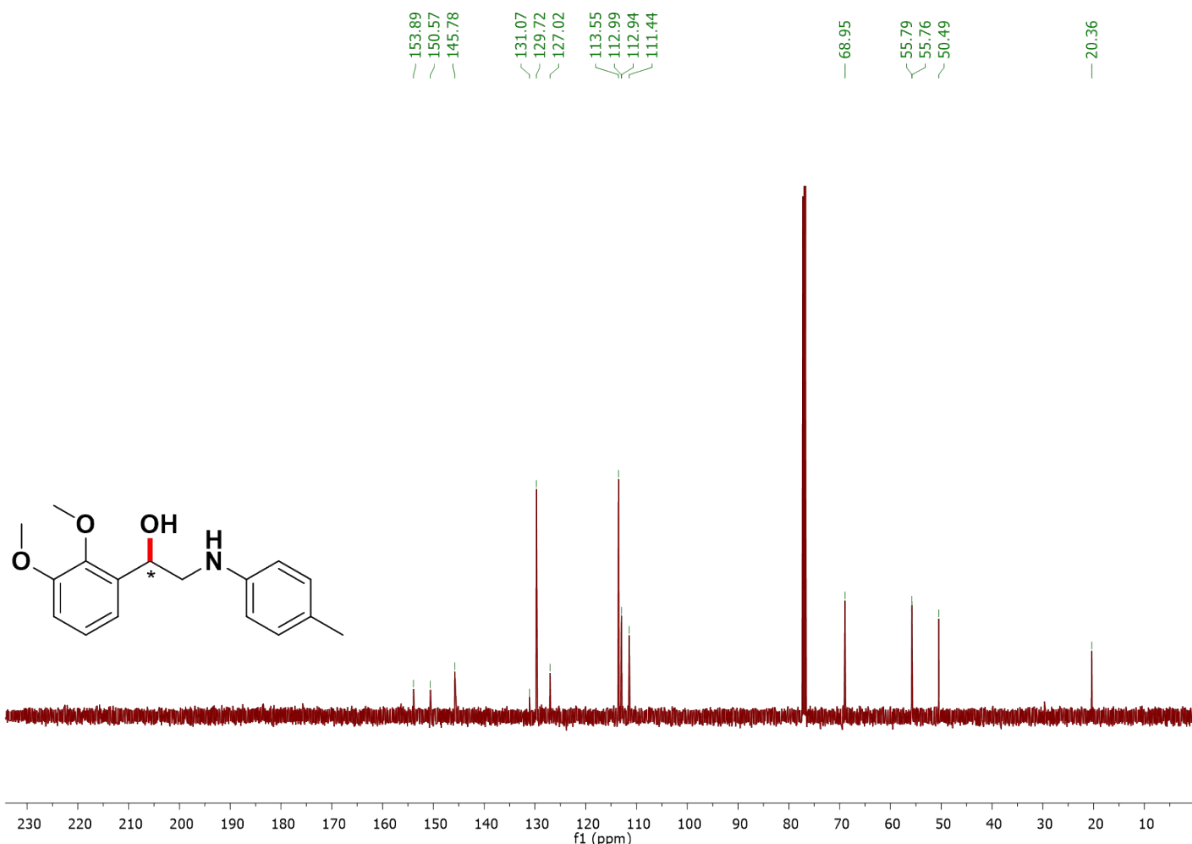

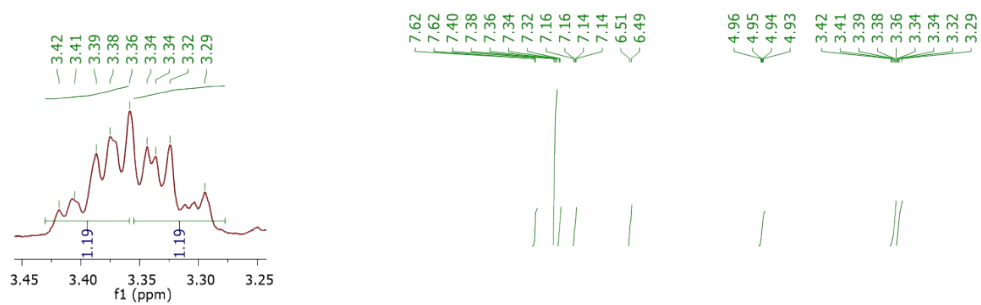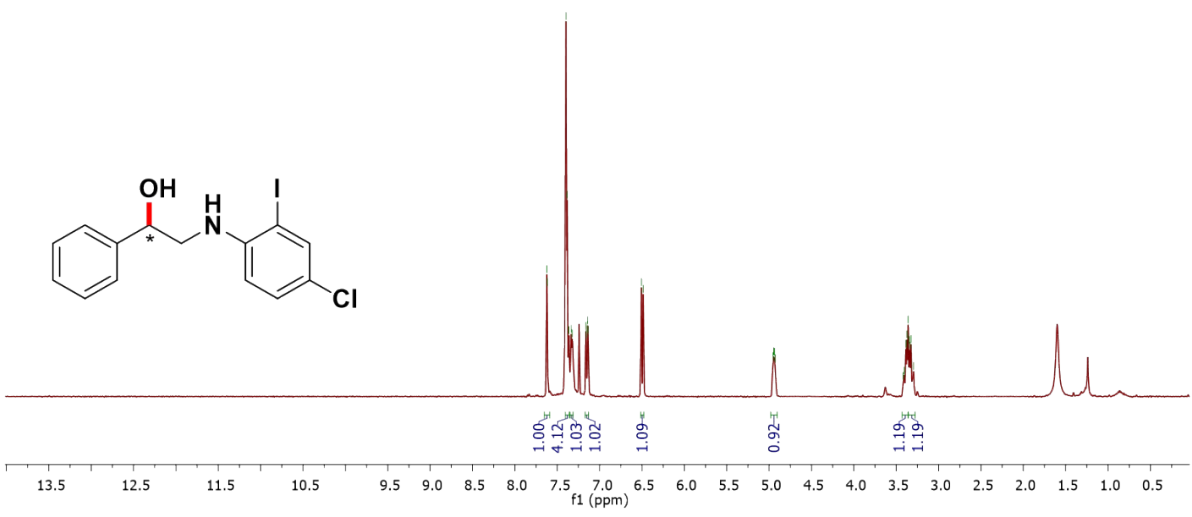

500 MHz  $^1\text{H-NMR}$  spectra of (-)-D15 in  $\text{CDCl}_3$

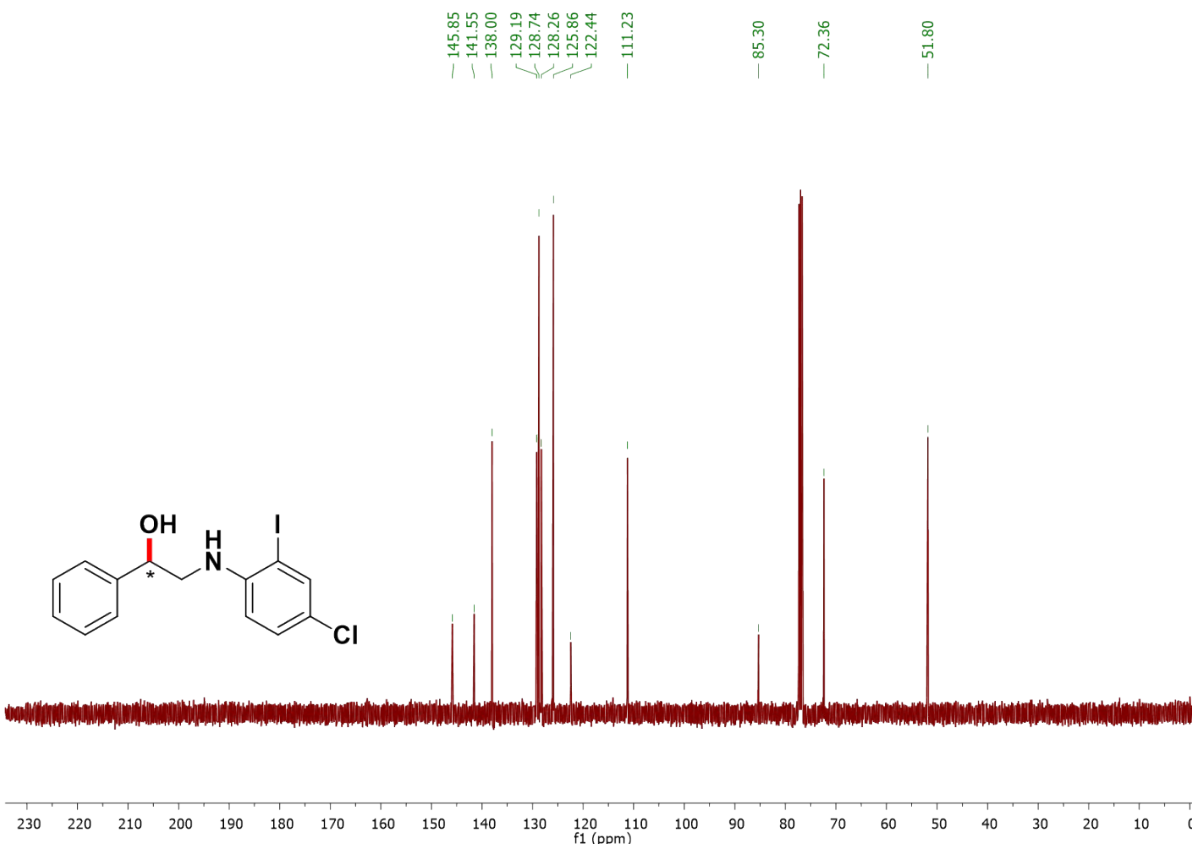

126 MHz  $^{13}\text{C-NMR}$  spectra of (-)-D15 in  $\text{CDCl}_3$

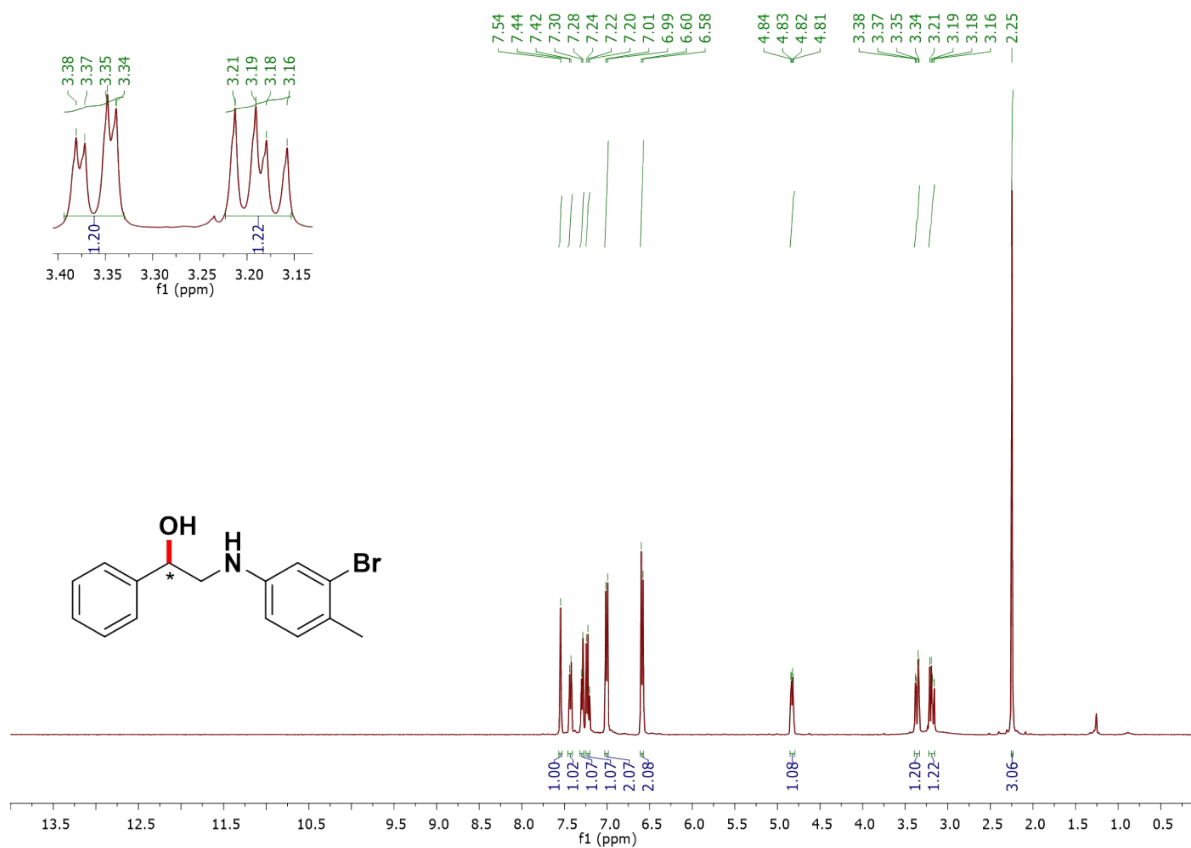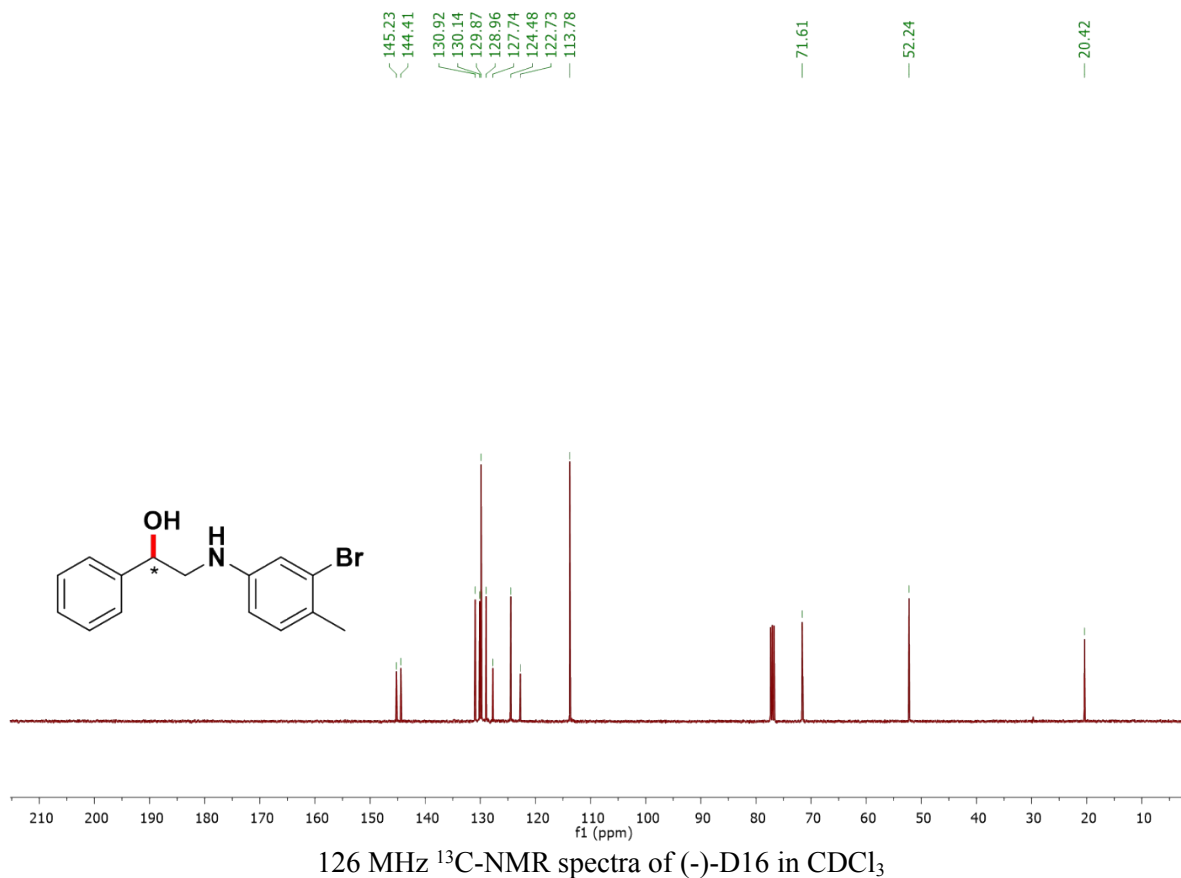



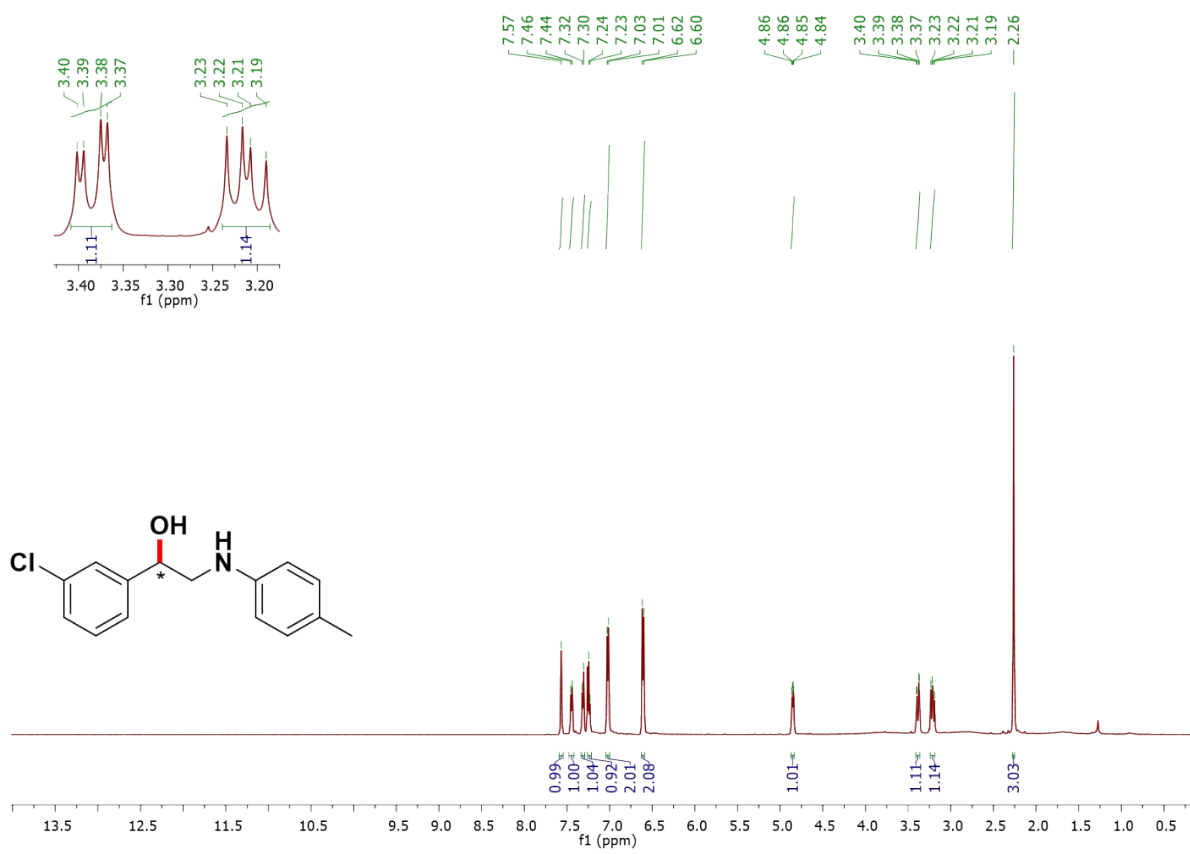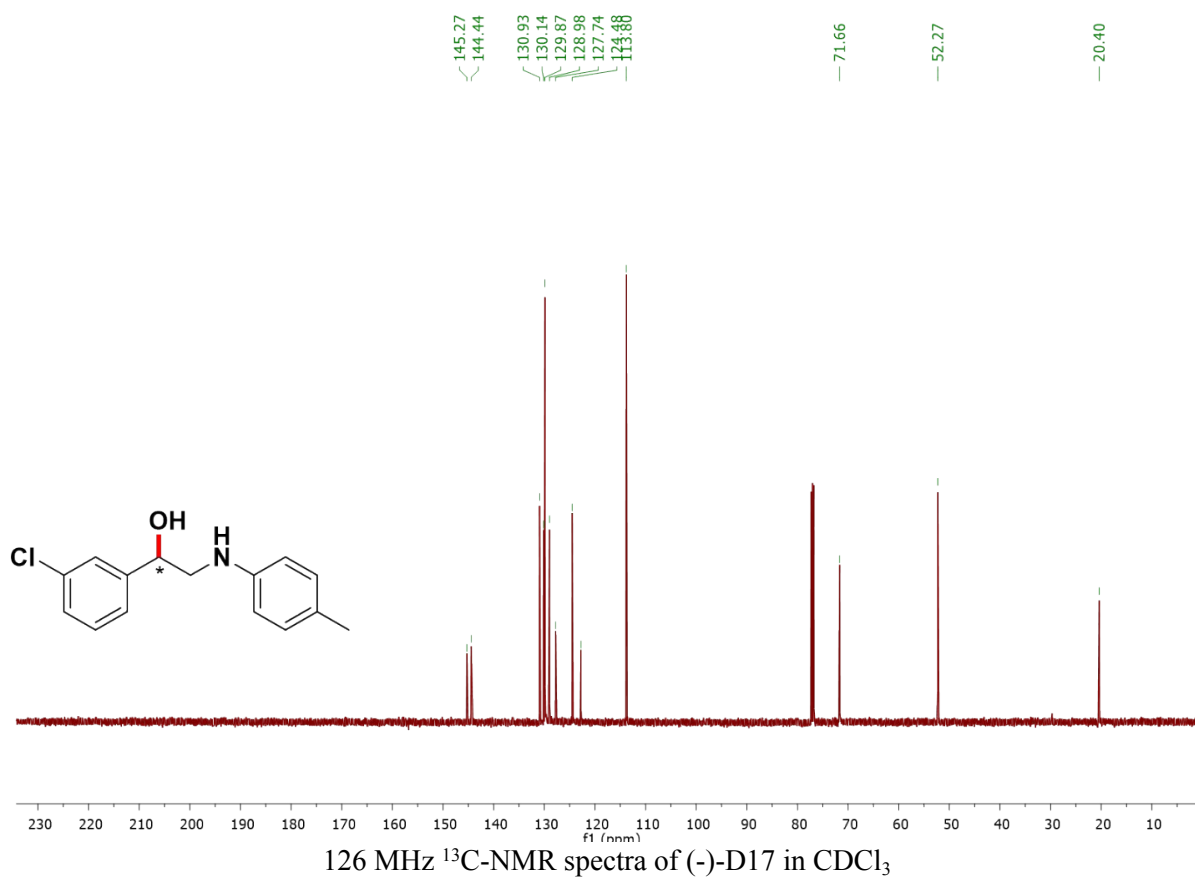

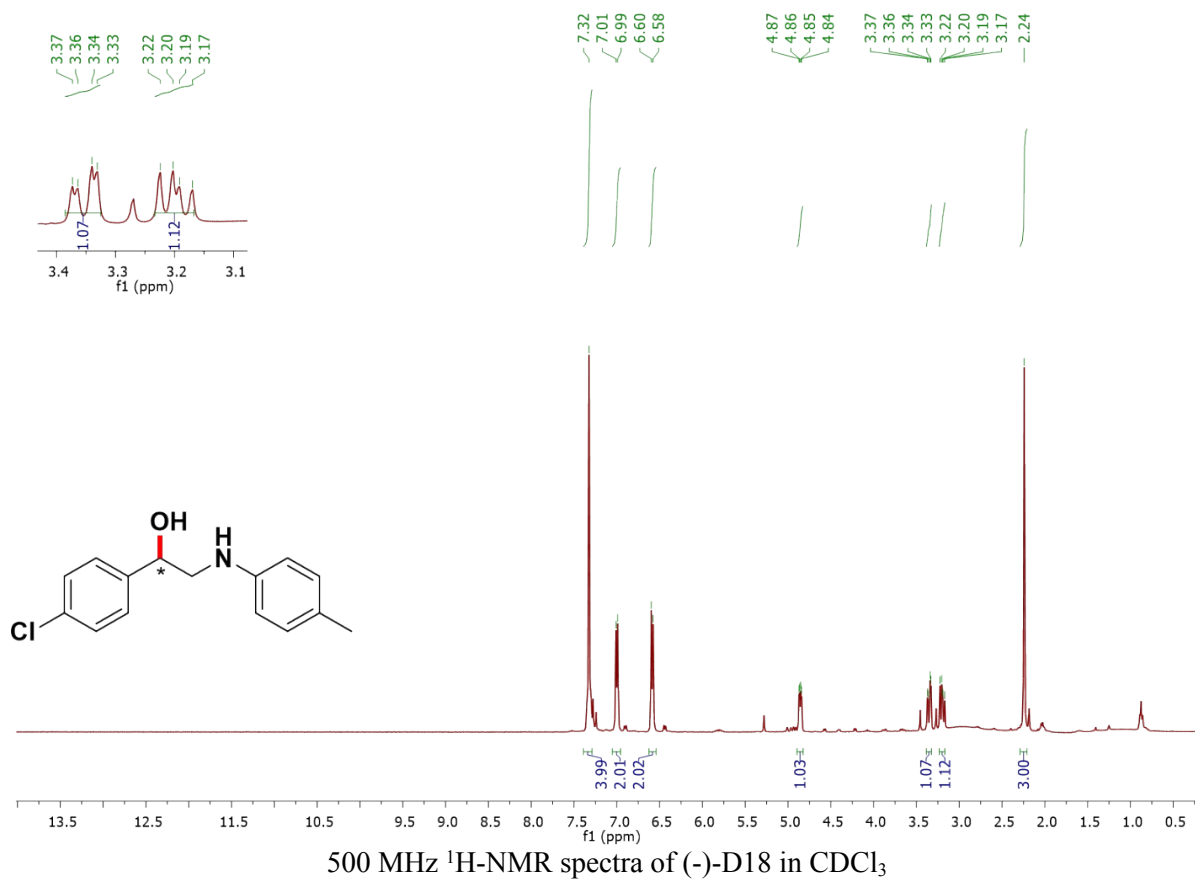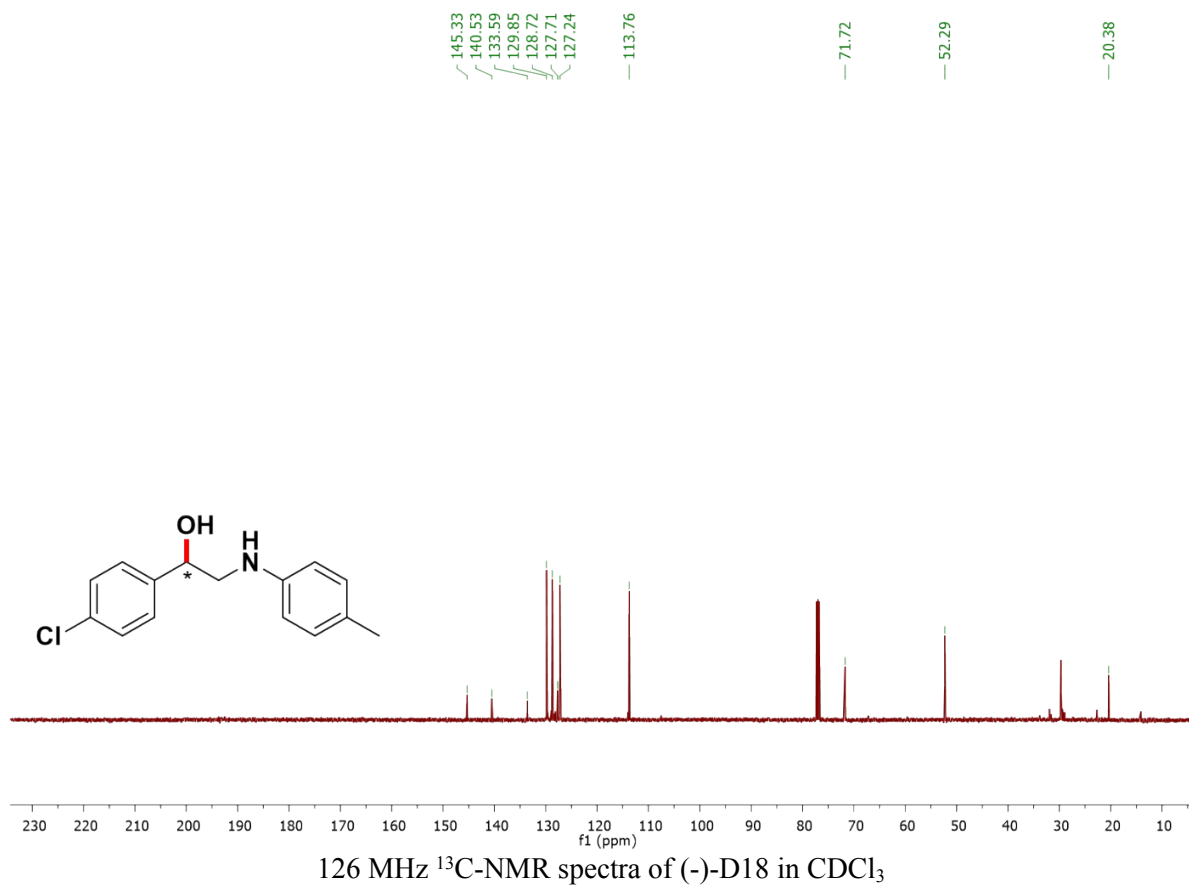

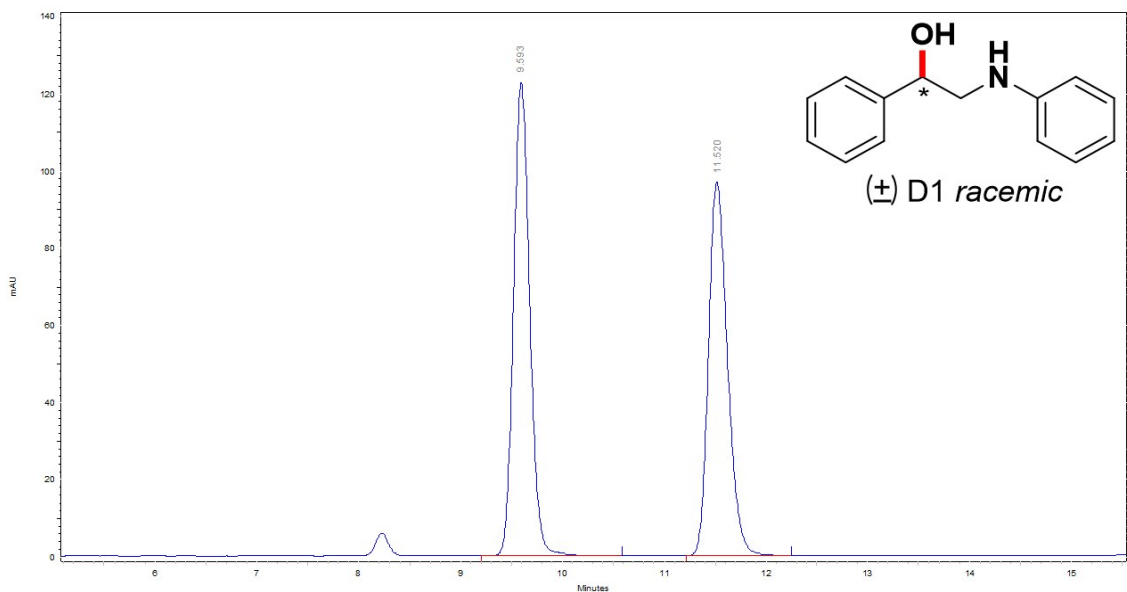

**DAD: Signal A,  
250 nm/Bw:4  
nm Results**

| Retention Time | Area    | Area % | Height | Height % |
|----------------|---------|--------|--------|----------|
| 9.593          | 2845240 | 51.98  | 257191 | 55.89    |
| 11.520         | 2628939 | 48.02  | 203004 | 44.11    |

|        |         |        |        |        |
|--------|---------|--------|--------|--------|
| Totals | 5474179 | 100.00 | 460195 | 100.00 |
|--------|---------|--------|--------|--------|

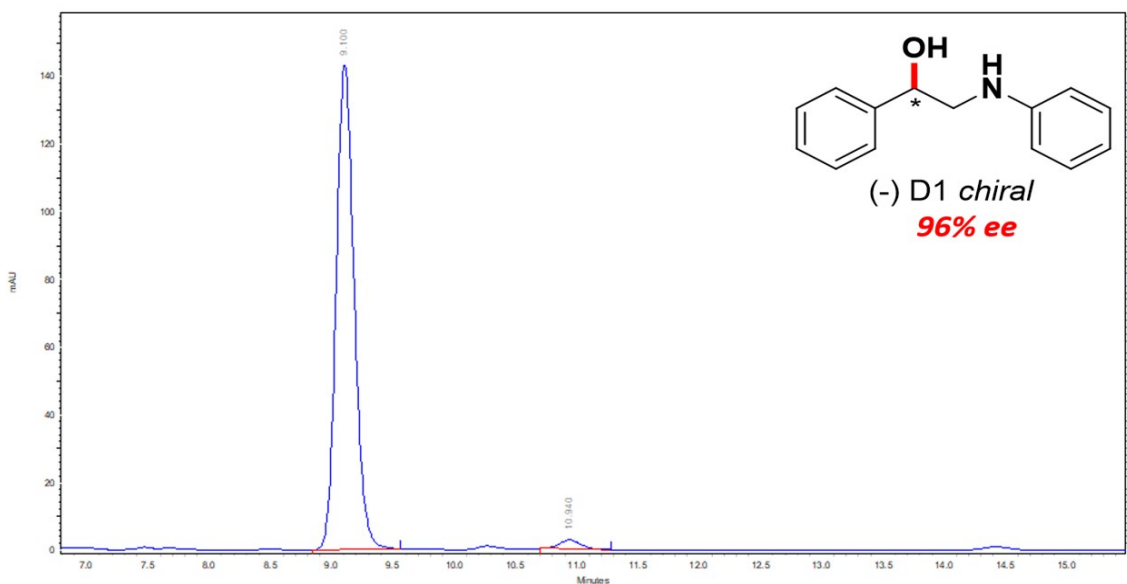

**DAD: Signal A,  
250 nm/Bw:4  
nm Results**

| Retention Time | Area    | Area % | Height | Height % |
|----------------|---------|--------|--------|----------|
| 9.100          | 3055549 | 97.95  | 300139 | 98.23    |
| 10.940         | 63834   | 2.05   | 5396   | 1.77     |

|        |         |        |        |        |
|--------|---------|--------|--------|--------|
| Totals | 3119383 | 100.00 | 305535 | 100.00 |
|--------|---------|--------|--------|--------|

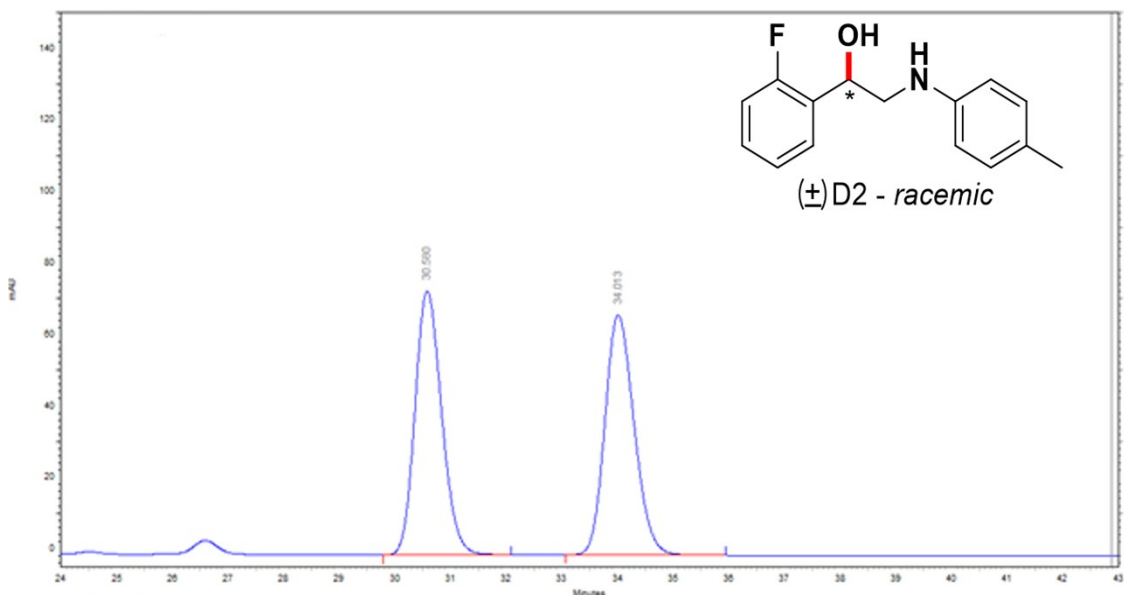

DAD: Signal A,  
250 nm/Bw:4  
nm Results

| Retention Time | Area    | Area % | Height | Height % |
|----------------|---------|--------|--------|----------|
| 30.580         | 5145595 | 50.01  | 154935 | 52.38    |
| 34.013         | 5142916 | 49.99  | 140852 | 47.62    |

| Totals | Area     | Area % | Height | Height % |
|--------|----------|--------|--------|----------|
|        | 10288511 | 100.00 | 295787 | 100.00   |

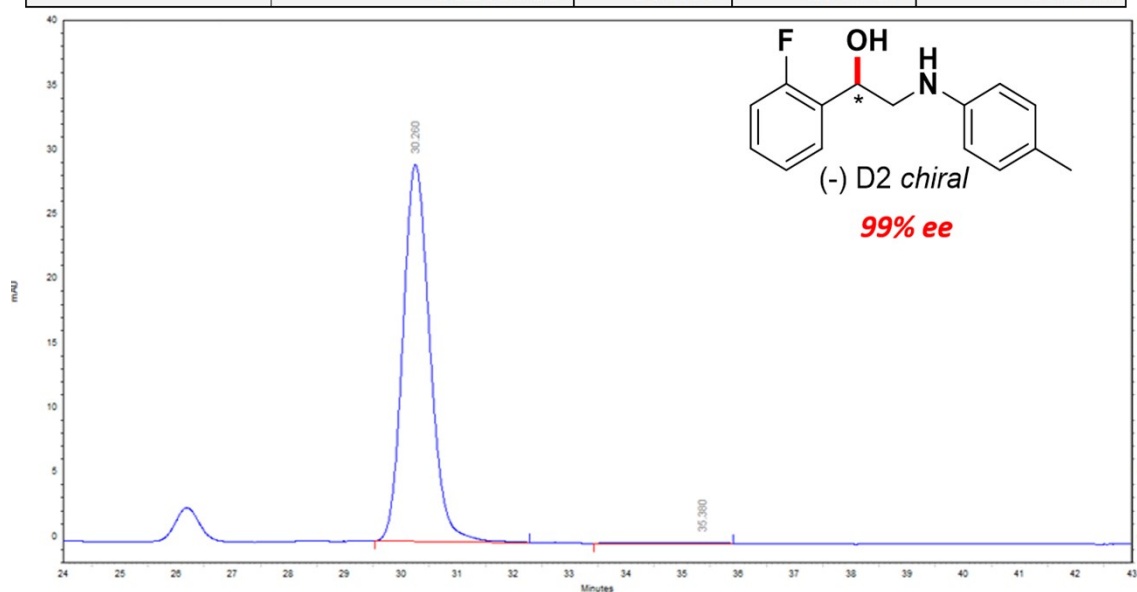

DAD: Signal A,  
250 nm/Bw:4  
nm Results

| Retention Time | Area    | Area % | Height | Height % |
|----------------|---------|--------|--------|----------|
| 30.260         | 2038837 | 99.59  | 61287  | 99.86    |
| 35.380         | 8350    | 0.41   | 88     | 0.14     |

| Totals | Area    | Area % | Height | Height % |
|--------|---------|--------|--------|----------|
|        | 2047187 | 100.00 | 61375  | 100.00   |

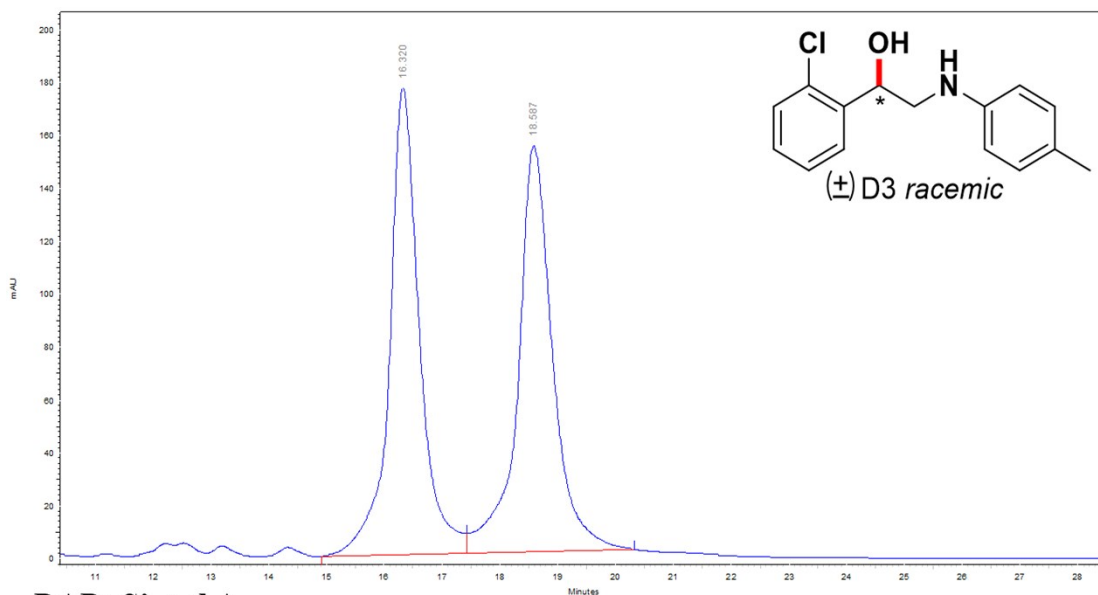

**DAD: Signal A,  
220 nm/Bw:4  
nm Results**

| Retention Time | Area     | Area % | Height | Height % |
|----------------|----------|--------|--------|----------|
| 16.320         | 13286028 | 49.59  | 369551 | 53.47    |
| 18.587         | 13504194 | 50.41  | 321576 | 46.53    |

| Totals | Area     | Area % | Height | Height % |
|--------|----------|--------|--------|----------|
|        | 26790222 | 100.00 | 691127 | 100.00   |

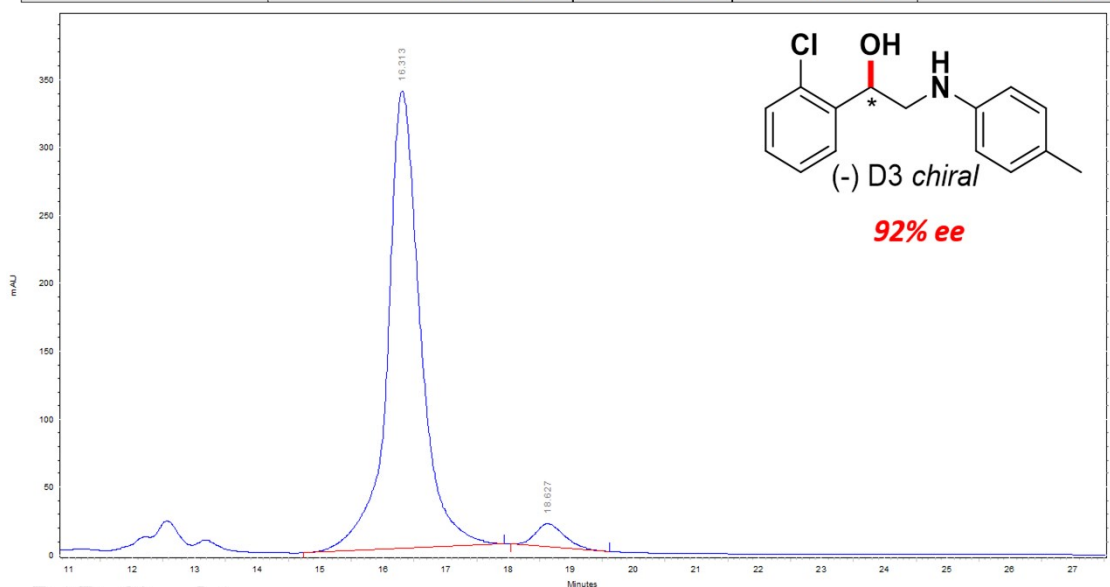

**DAD: Signal A,  
220 nm/Bw:4  
nm Results**

| Retention Time | Area     | Area % | Height | Height % |
|----------------|----------|--------|--------|----------|
| 16.313         | 25712512 | 95.82  | 704936 | 95.31    |
| 18.627         | 1120374  | 4.18   | 34700  | 4.69     |

| Totals | Area     | Area % | Height | Height % |
|--------|----------|--------|--------|----------|
|        | 26832886 | 100.00 | 739636 | 100.00   |

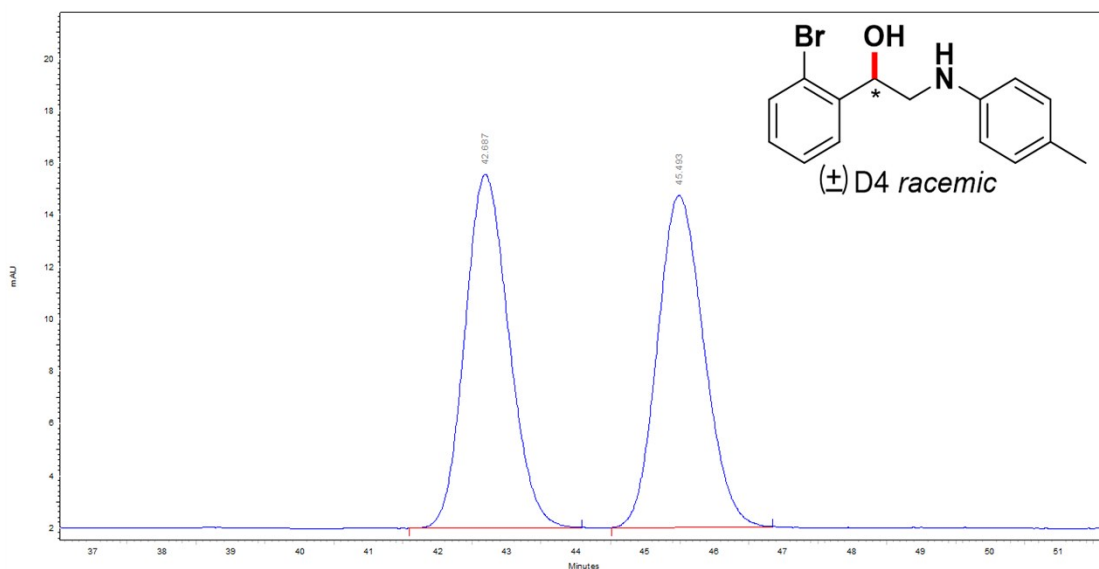

**DAD: Signal A,  
250 nm/Bw:4  
nm Results**

| Retention Time | Area    | Area % | Height | Height % |
|----------------|---------|--------|--------|----------|
| 42.687         | 1254912 | 50.22  | 28390  | 51.57    |
| 45.493         | 1244116 | 49.78  | 26657  | 48.43    |

| Totals | Area    | Area % | Height | Height % |
|--------|---------|--------|--------|----------|
|        | 2499028 | 100.00 | 55047  | 100.00   |

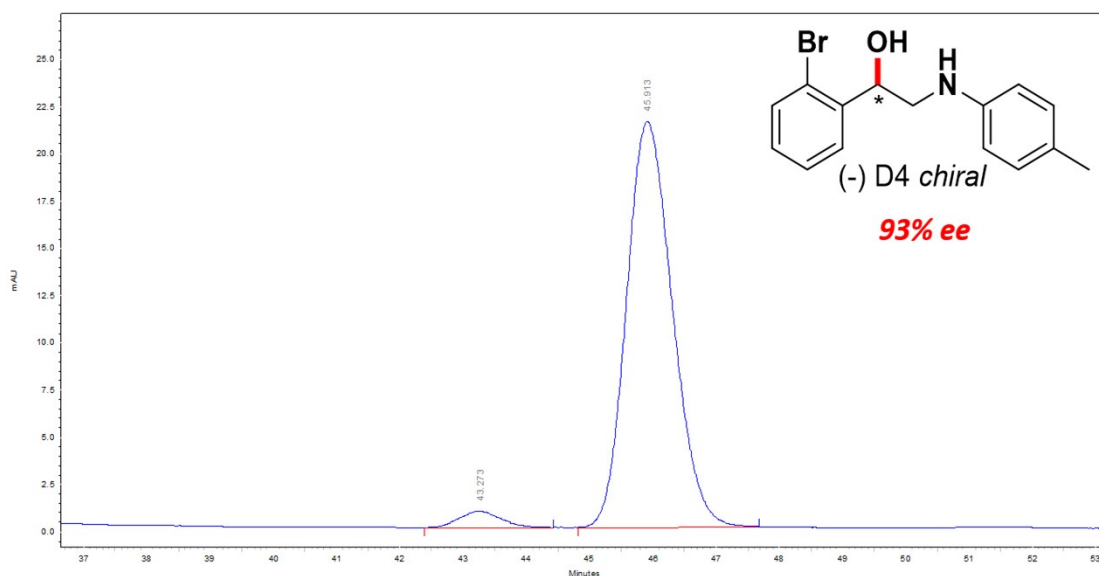

**DAD: Signal A,  
250 nm/Bw:4  
nm Results**

| Retention Time | Area    | Area % | Height | Height % |
|----------------|---------|--------|--------|----------|
| 43.273         | 83929   | 3.57   | 1784   | 3.81     |
| 45.913         | 2265145 | 96.43  | 45015  | 96.19    |

| Totals | Area    | Area % | Height | Height % |
|--------|---------|--------|--------|----------|
|        | 2349074 | 100.00 | 46799  | 100.00   |

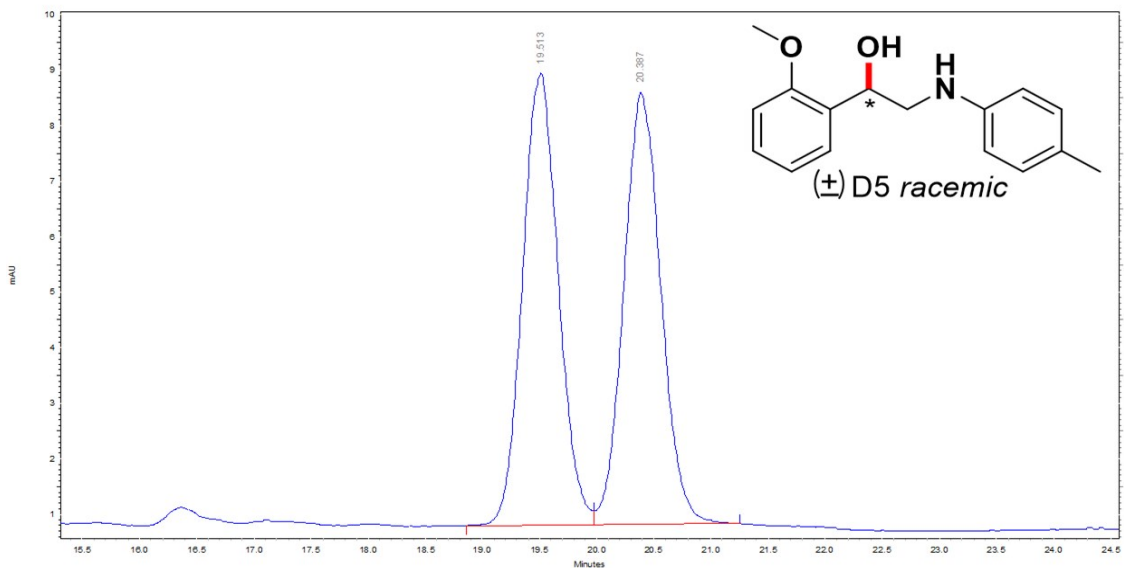

**DAD: Signal A,  
250 nm/Bw:4  
nm Results**

| Retention Time | Area   | Area % | Height | Height % |
|----------------|--------|--------|--------|----------|
| 19.513         | 371979 | 50.22  | 17080  | 51.15    |
| 20.387         | 368660 | 49.78  | 16314  | 48.85    |

| Totals | Area   | Area % | Height | Height % |
|--------|--------|--------|--------|----------|
|        | 740639 | 100.00 | 33394  | 100.00   |

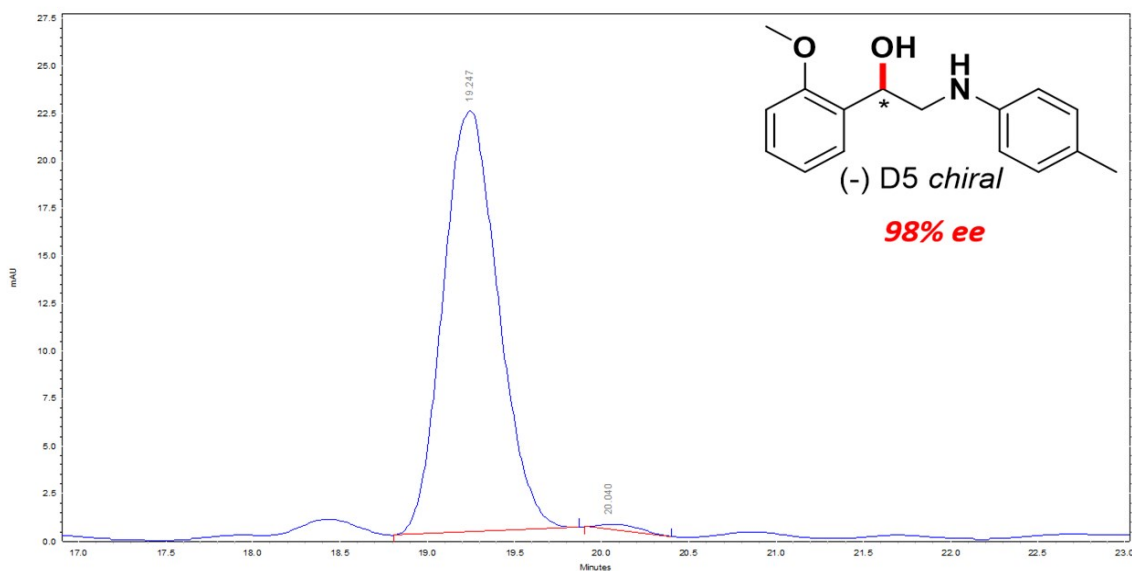

**DAD: Signal A,  
250 nm/Bw:4  
nm Results**

| Retention Time | Area    | Area % | Height | Height % |
|----------------|---------|--------|--------|----------|
| 19.247         | 1019526 | 98.95  | 46412  | 98.82    |
| 20.040         | 10809   | 1.05   | 556    | 1.18     |

| Totals | Area    | Area % | Height | Height % |
|--------|---------|--------|--------|----------|
|        | 1030335 | 100.00 | 46968  | 100.00   |

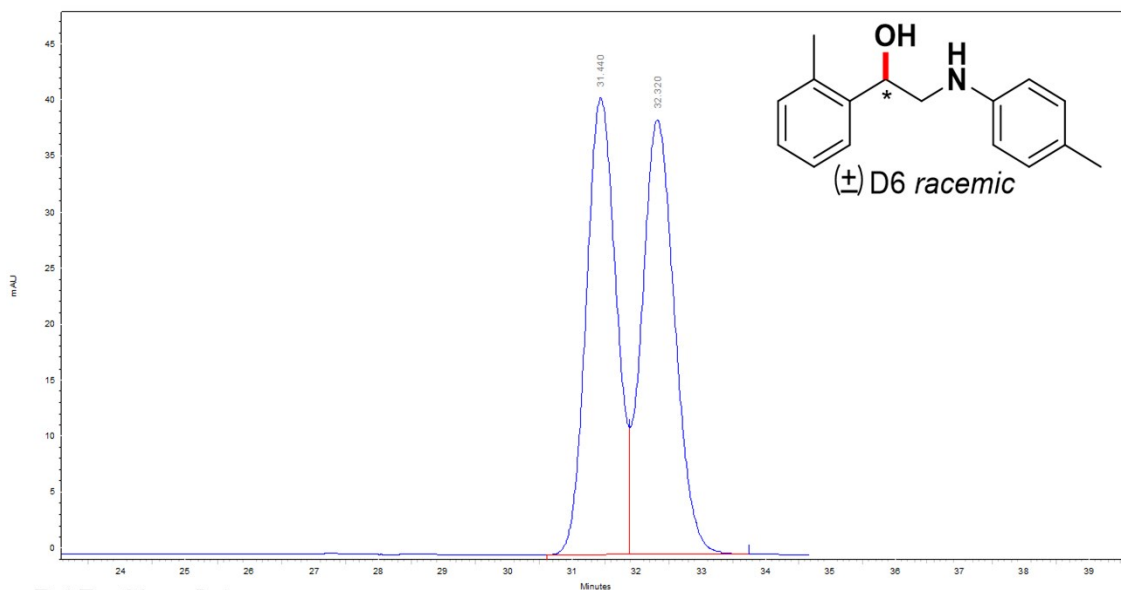

**DAD: Signal A,  
250 nm/Bw:4  
nm Results**

| Retention Time | Area    | Area % | Height | Height % |
|----------------|---------|--------|--------|----------|
| 31.440         | 2756949 | 49.02  | 85485  | 51.25    |
| 32.320         | 2867372 | 50.98  | 81308  | 48.75    |

| Totals | Area    | Area % | Height | Height % |
|--------|---------|--------|--------|----------|
|        | 5624321 | 100.00 | 166793 | 100.00   |

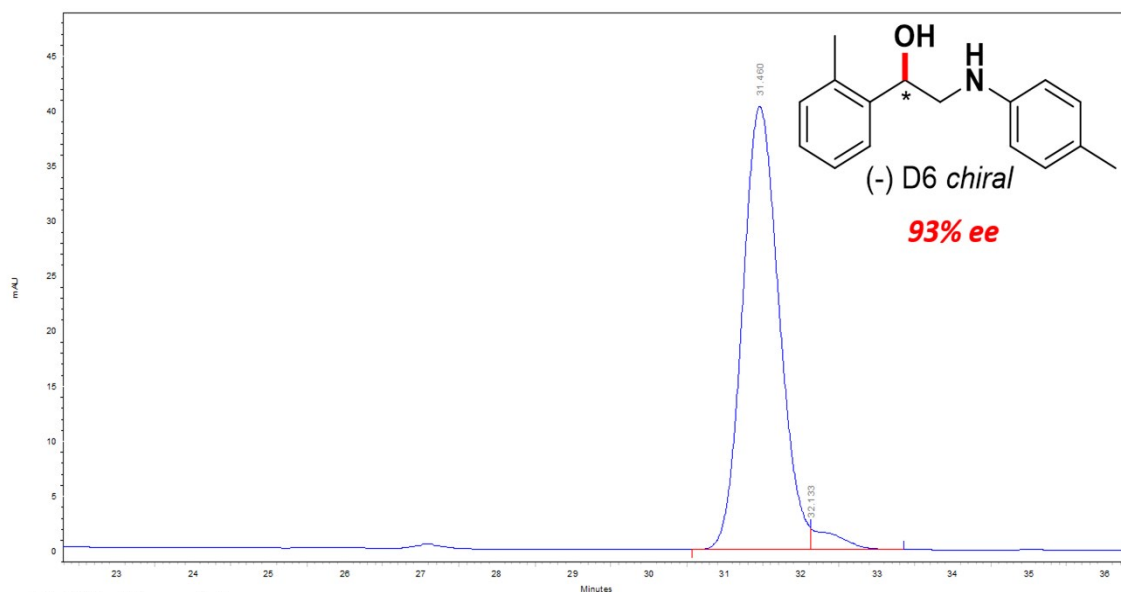

**DAD: Signal A,  
250 nm/Bw:4  
nm Results**

| Retention Time | Area    | Area % | Height | Height % |
|----------------|---------|--------|--------|----------|
| 31.460         | 2807772 | 96.57  | 84439  | 95.47    |
| 32.133         | 99638   | 3.43   | 4005   | 4.53     |

| Totals | Area    | Area % | Height | Height % |
|--------|---------|--------|--------|----------|
|        | 2907410 | 100.00 | 88444  | 100.00   |



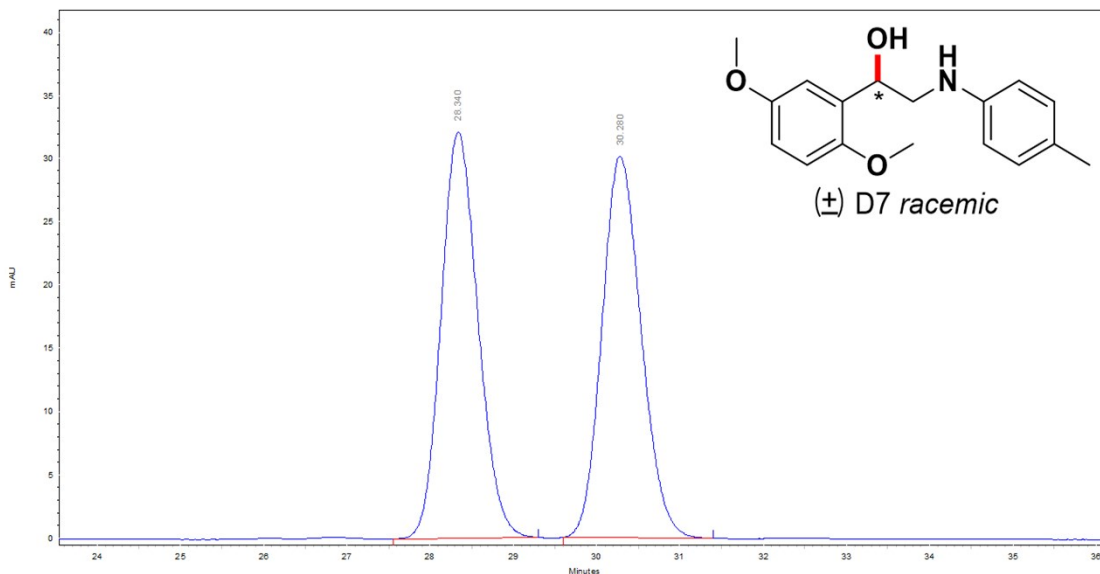

**DAD: Signal A,  
250 nm/Bw:4  
nm Results**

| Retention Time | Area    | Area % | Height | Height % |
|----------------|---------|--------|--------|----------|
| 28.340         | 2075294 | 50.06  | 67307  | 51.56    |
| 30.280         | 2070247 | 49.94  | 63239  | 48.44    |

|        |         |        |        |        |
|--------|---------|--------|--------|--------|
| Totals | 4145541 | 100.00 | 130546 | 100.00 |
|--------|---------|--------|--------|--------|

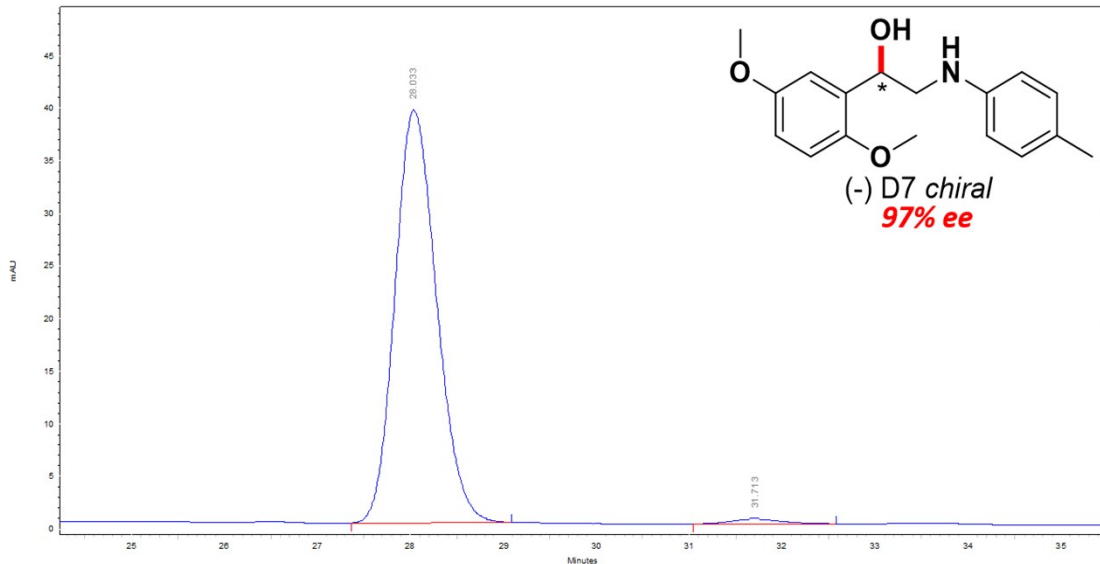

**DAD: Signal A,  
250 nm/Bw:4  
nm Results**

| Retention Time | Area    | Area % | Height | Height % |
|----------------|---------|--------|--------|----------|
| 28.033         | 2564876 | 98.54  | 82231  | 98.79    |
| 31.713         | 38080   | 1.46   | 1005   | 1.21     |

|        |         |        |       |        |
|--------|---------|--------|-------|--------|
| Totals | 2602956 | 100.00 | 83236 | 100.00 |
|--------|---------|--------|-------|--------|

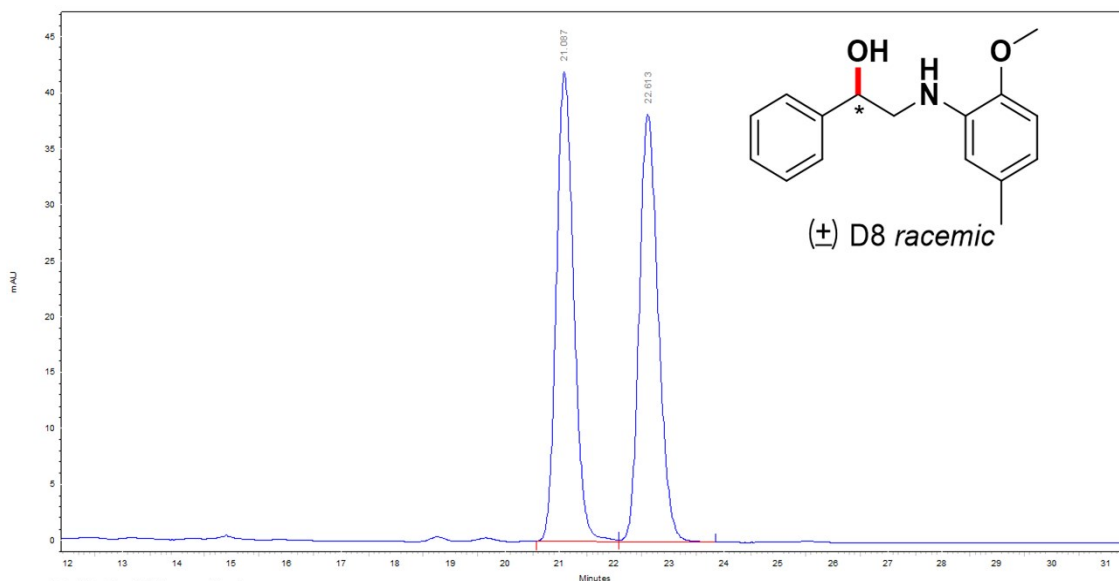

**DAD: Signal A,  
250 nm/Bw:4  
nm Results**

| Retention Time | Area    | Area % | Height | Height % |
|----------------|---------|--------|--------|----------|
| 21.087         | 1929473 | 49.88  | 87840  | 52.31    |
| 22.613         | 1938827 | 50.12  | 80067  | 47.69    |

| Totals | Area    | Area % | Height | Height % |
|--------|---------|--------|--------|----------|
|        | 3868300 | 100.00 | 167907 | 100.00   |

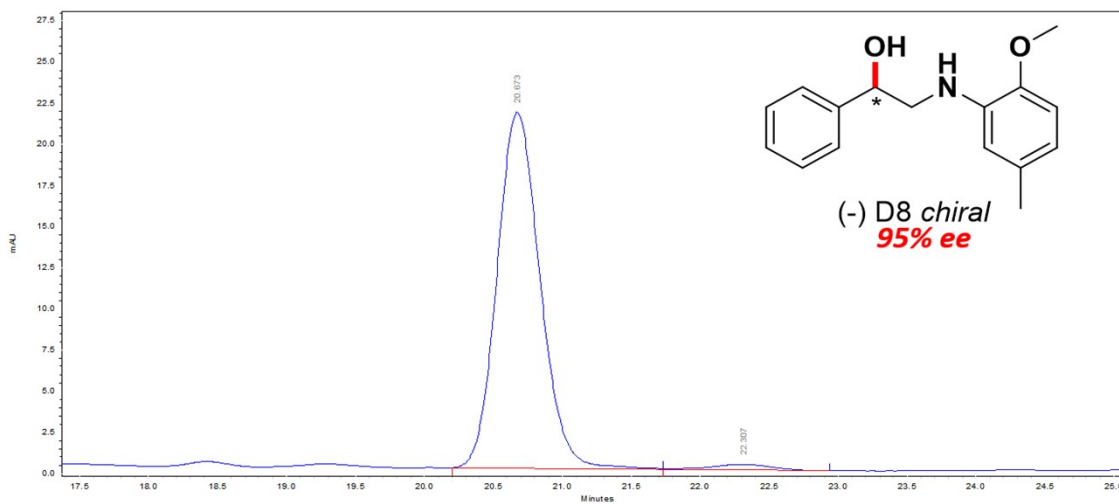

**DAD: Signal  
A, 250  
nm/Bw:4 nm  
Results**

| Retention Time | Area   | Area % | Height | Height % |
|----------------|--------|--------|--------|----------|
| 20.673         | 980216 | 97.71  | 45324  | 98.40    |
| 22.307         | 22942  | 2.29   | 739    | 1.60     |

| Totals | Area    | Area % | Height | Height % |
|--------|---------|--------|--------|----------|
|        | 1003158 | 100.00 | 46063  | 100.00   |

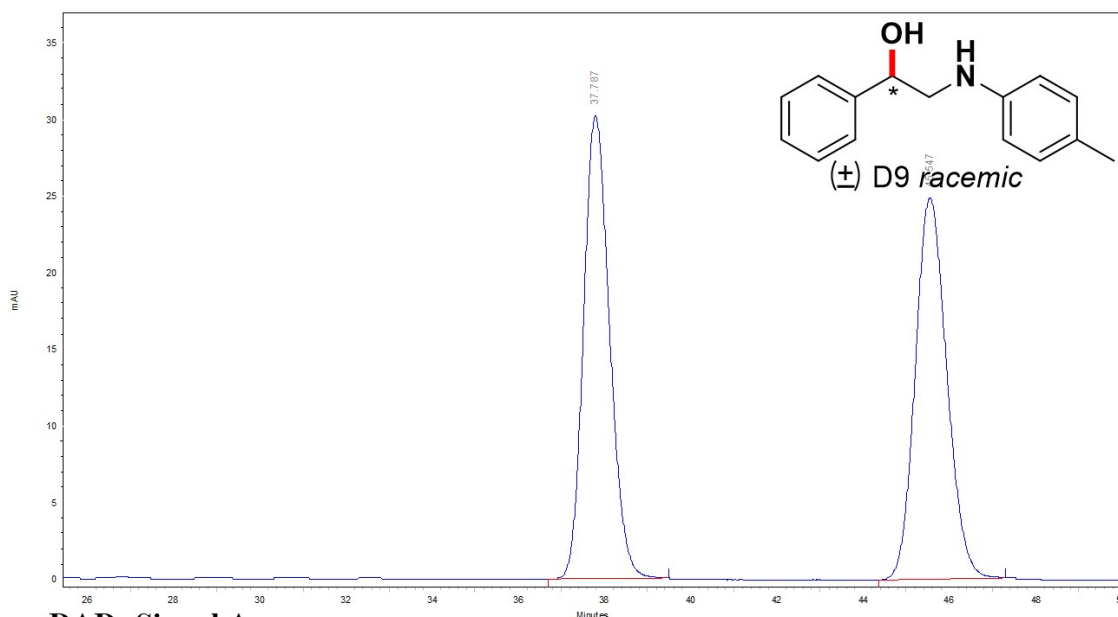

**DAD: Signal A,  
254 nm/Bw:4  
nm Results**

| Retention Time | Area    | Area % | Height | Height % |
|----------------|---------|--------|--------|----------|
| 37.787         | 2657715 | 50.08  | 63392  | 54.85    |
| 45.547         | 2649749 | 49.92  | 52171  | 45.15    |

| Totals | Area    | Area % | Height | Height % |
|--------|---------|--------|--------|----------|
|        | 5307464 | 100.00 | 115563 | 100.00   |

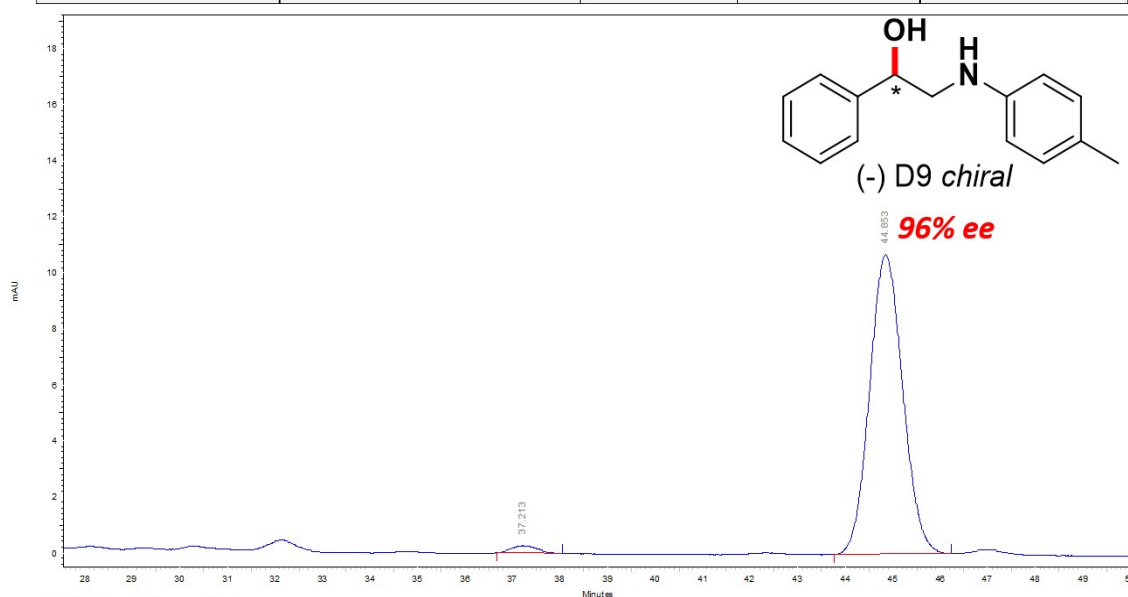

**DAD: Signal A,  
254 nm/Bw:4  
nm Results**

| Retention Time | Area    | Area % | Height | Height % |
|----------------|---------|--------|--------|----------|
| 37.213         | 20483   | 1.85   | 545    | 2.38     |
| 44.853         | 1086630 | 98.15  | 22397  | 97.62    |

| Totals | Area    | Area % | Height | Height % |
|--------|---------|--------|--------|----------|
|        | 1107113 | 100.00 | 22942  | 100.00   |

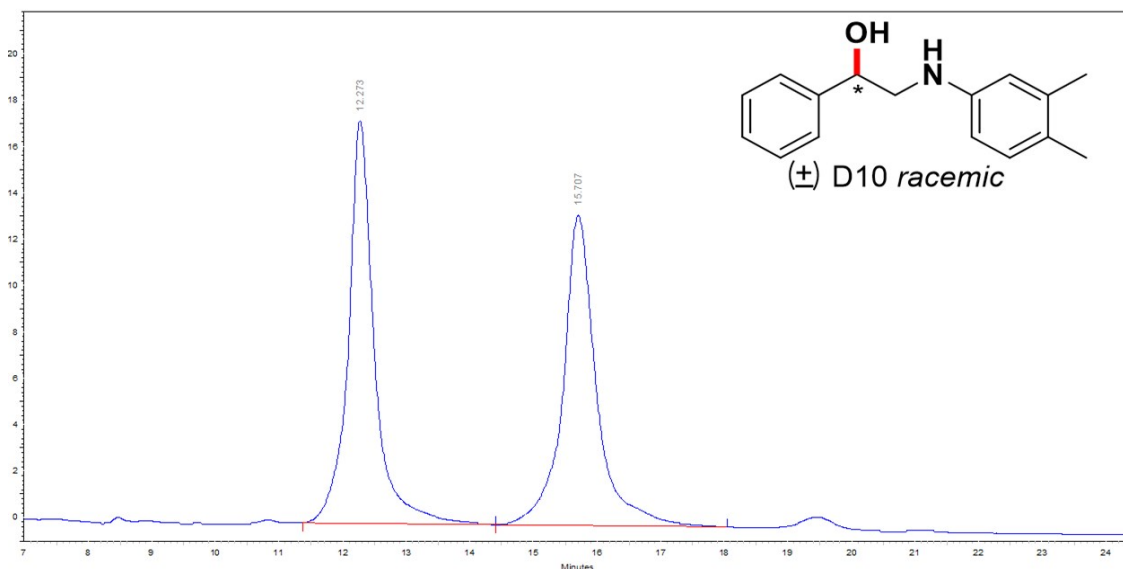

**DAD: Signal A,  
250 nm/Bw:4  
nm Results**

| Retention Time | Area    | Area % | Height | Height % |
|----------------|---------|--------|--------|----------|
| 12.273         | 1046447 | 50.21  | 36403  | 56.48    |
| 15.707         | 1037812 | 49.79  | 28049  | 43.52    |

| Totals | Area    | Area % | Height | Height % |
|--------|---------|--------|--------|----------|
|        | 2084259 | 100.00 | 64452  | 100.00   |

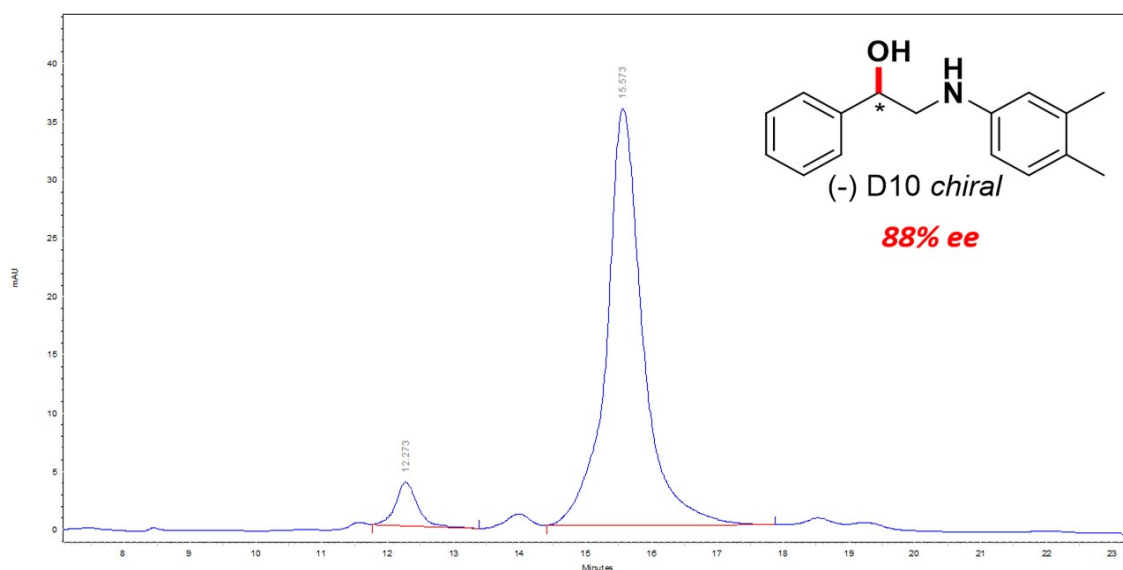

**DAD: Signal A,  
250 nm/Bw:4  
nm Results**

| Retention Time | Area    | Area % | Height | Height % |
|----------------|---------|--------|--------|----------|
| 12.273         | 178879  | 5.85   | 7756   | 9.38     |
| 15.573         | 2880578 | 94.15  | 74970  | 90.62    |

| Totals | Area    | Area % | Height | Height % |
|--------|---------|--------|--------|----------|
|        | 3059457 | 100.00 | 82726  | 100.00   |

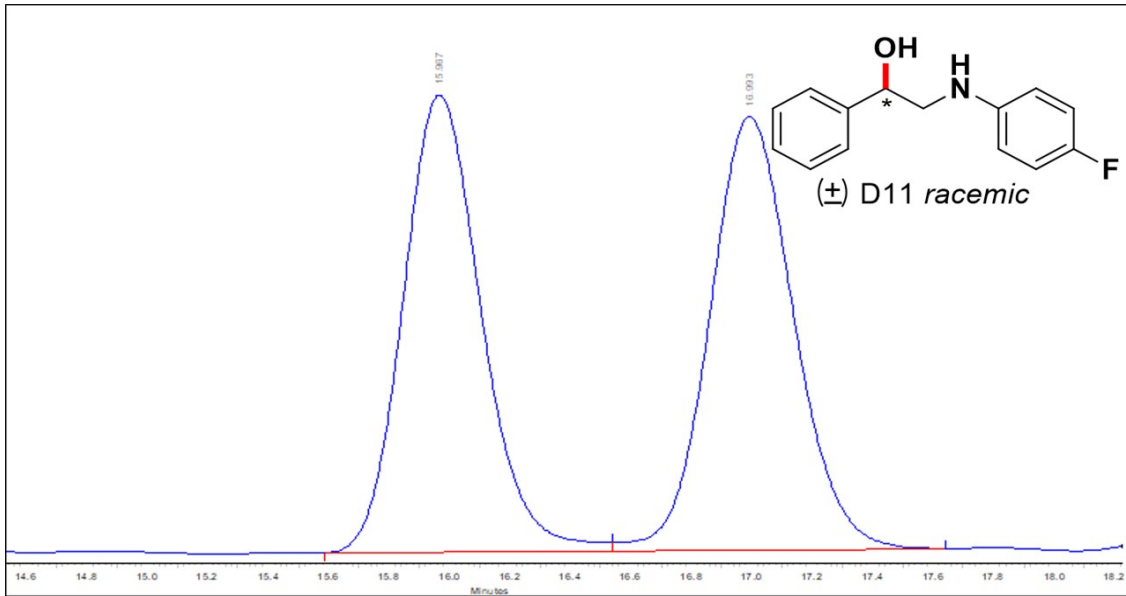

**DAD: Signal A,  
250 nm/Bw:4  
nm Results**

| Retention Time | Area    | Area % | Height | Height % |
|----------------|---------|--------|--------|----------|
| 15.967         | 1656199 | 49.47  | 92350  | 51.33    |
| 16.993         | 1691991 | 50.53  | 87559  | 48.67    |

| Totals | Area    | Area % | Height | Height % |
|--------|---------|--------|--------|----------|
|        | 3348190 | 100.00 | 179909 | 100.00   |

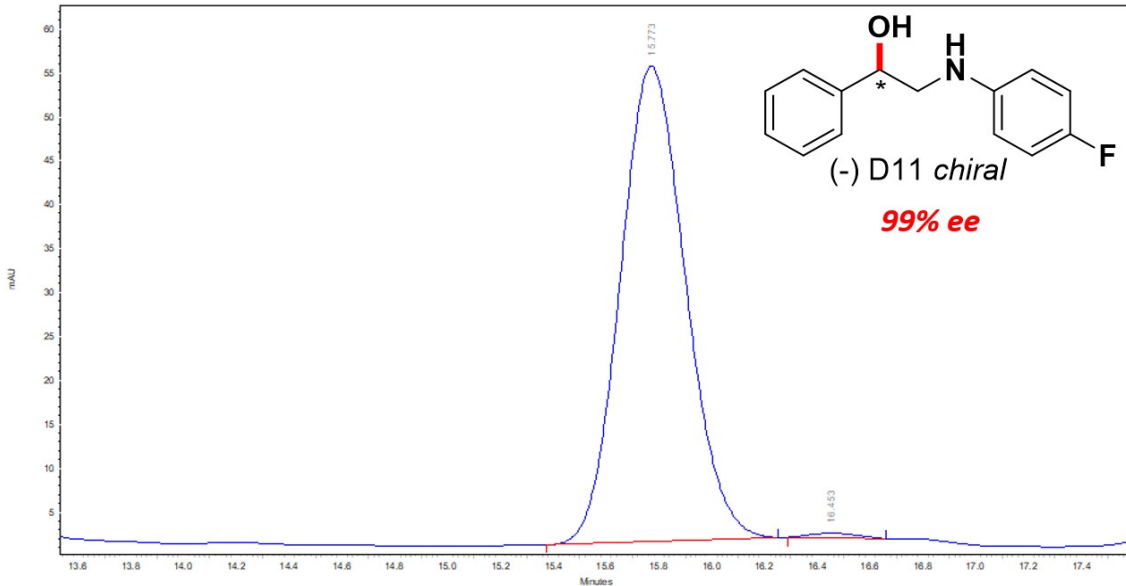

**DAD: Signal A,  
254 nm/Bw:4  
nm Results**

| Retention Time | Area    | Area % | Height | Height % |
|----------------|---------|--------|--------|----------|
| 15.773         | 1943142 | 99.38  | 113456 | 99.15    |
| 16.453         | 12128   | 0.62   | 969    | 0.85     |

| Totals | Area    | Area % | Height | Height % |
|--------|---------|--------|--------|----------|
|        | 1955270 | 100.00 | 114425 | 100.00   |

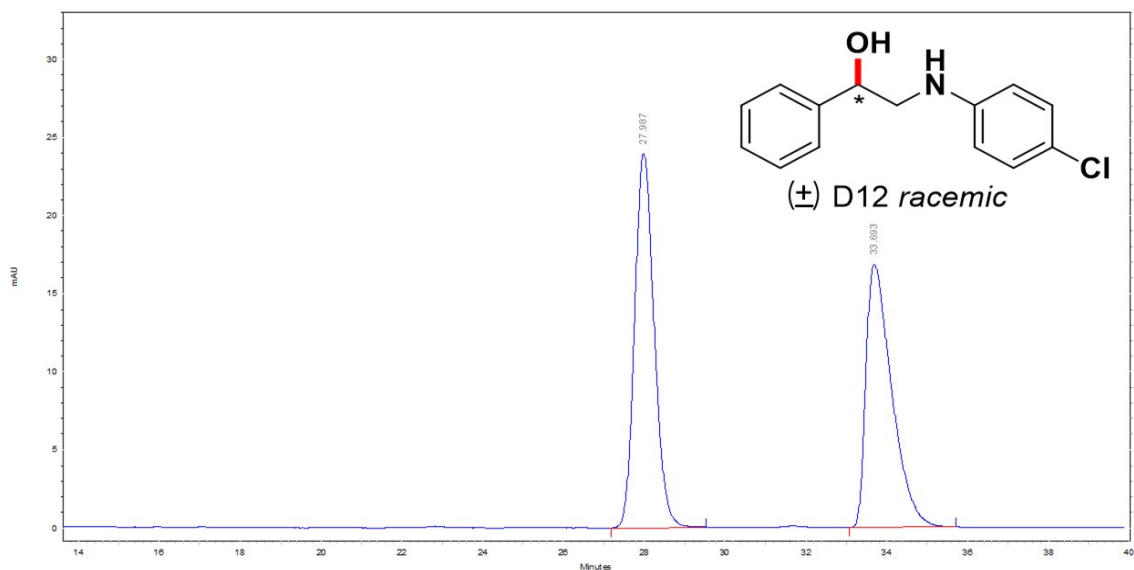

**DAD: Signal A,  
250 nm/Bw:4  
nm Results**

| Retention Time | Area    | Area % | Height | Height % |
|----------------|---------|--------|--------|----------|
| 27.987         | 1682268 | 51.74  | 50204  | 58.68    |
| 33.693         | 1569201 | 48.26  | 35346  | 41.32    |

| Totals | Area    | Area % | Height | Height % |
|--------|---------|--------|--------|----------|
|        | 3251469 | 100.00 | 85550  | 100.00   |

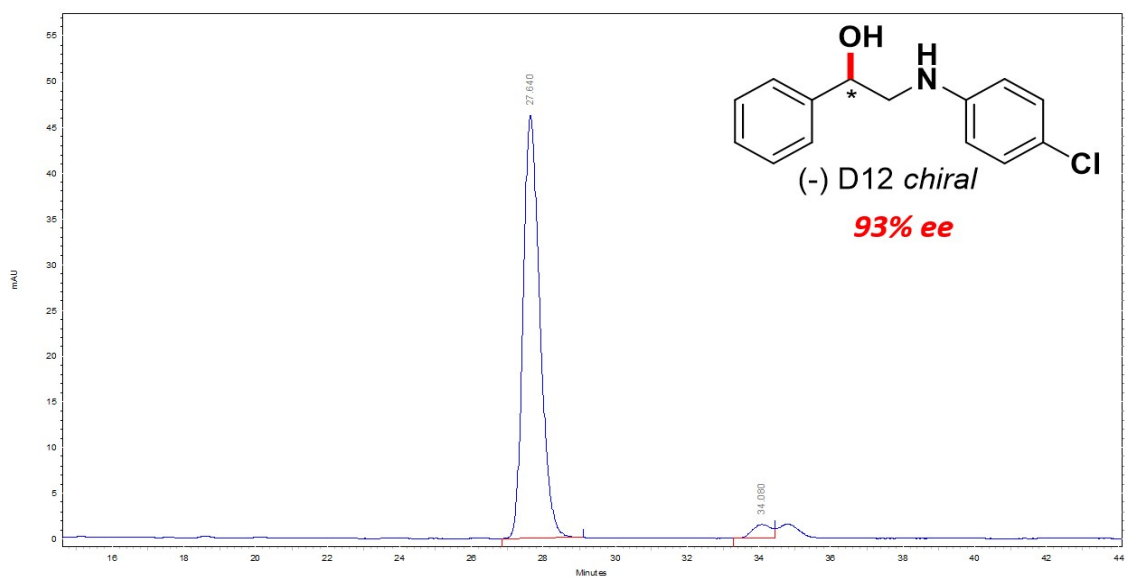

**DAD: Signal A,  
250 nm/Bw:4  
nm Results**

| Retention Time | Area    | Area % | Height | Height % |
|----------------|---------|--------|--------|----------|
| 27.640         | 3140680 | 96.48  | 97032  | 96.89    |
| 34.080         | 114584  | 3.52   | 3116   | 3.11     |

| Totals | Area    | Area % | Height | Height % |
|--------|---------|--------|--------|----------|
|        | 3255264 | 100.00 | 100148 | 100.00   |

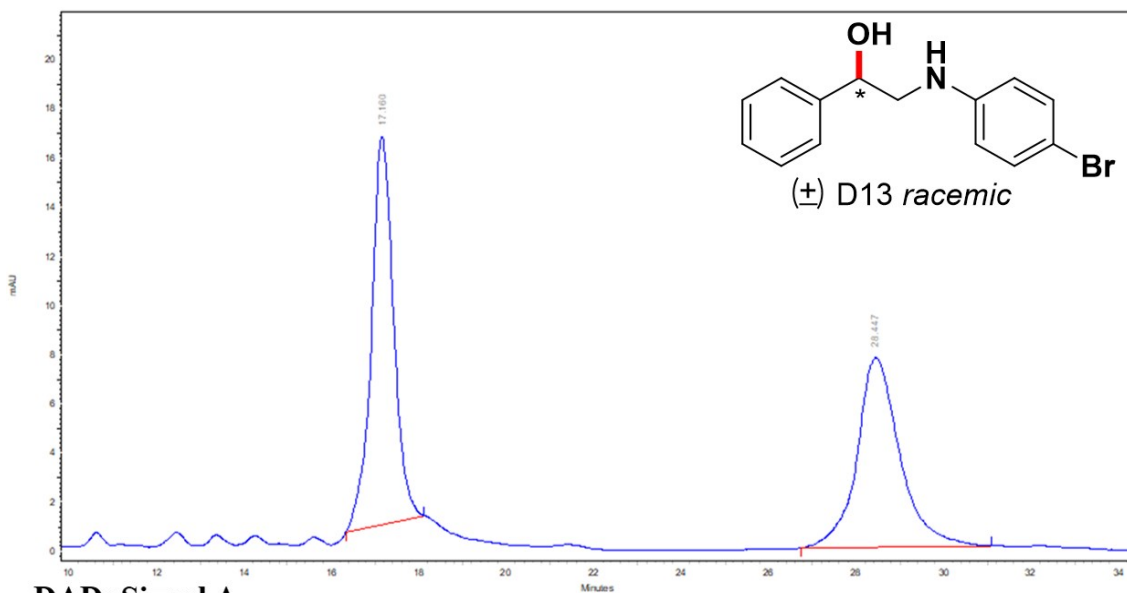

DAD: Signal A,

250 nm/Bw:4

nm Results

| Retention Time | Area    | Area % | Height | Height % |
|----------------|---------|--------|--------|----------|
| 17.160         | 1164037 | 51.34  | 33106  | 67.22    |
| 28.447         | 1103119 | 48.66  | 16143  | 32.78    |

| Totals | Area    | Area % | Height | Height % |
|--------|---------|--------|--------|----------|
|        | 2267156 | 100.00 | 49249  | 100.00   |

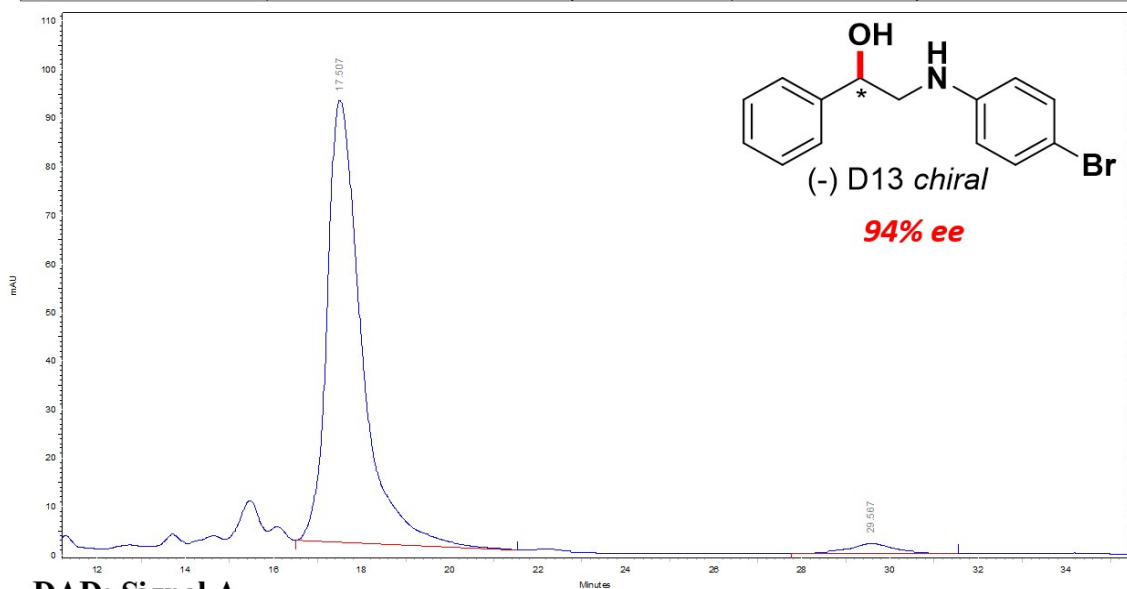

DAD: Signal A,

250 nm/Bw:4

nm Results

| Retention Time | Area     | Area % | Height | Height % |
|----------------|----------|--------|--------|----------|
| 17.507         | 10394650 | 97.07  | 191070 | 97.73    |
| 29.567         | 313878   | 2.93   | 4432   | 2.27     |

| Totals | Area     | Area % | Height | Height % |
|--------|----------|--------|--------|----------|
|        | 10708528 | 100.00 | 195502 | 100.00   |

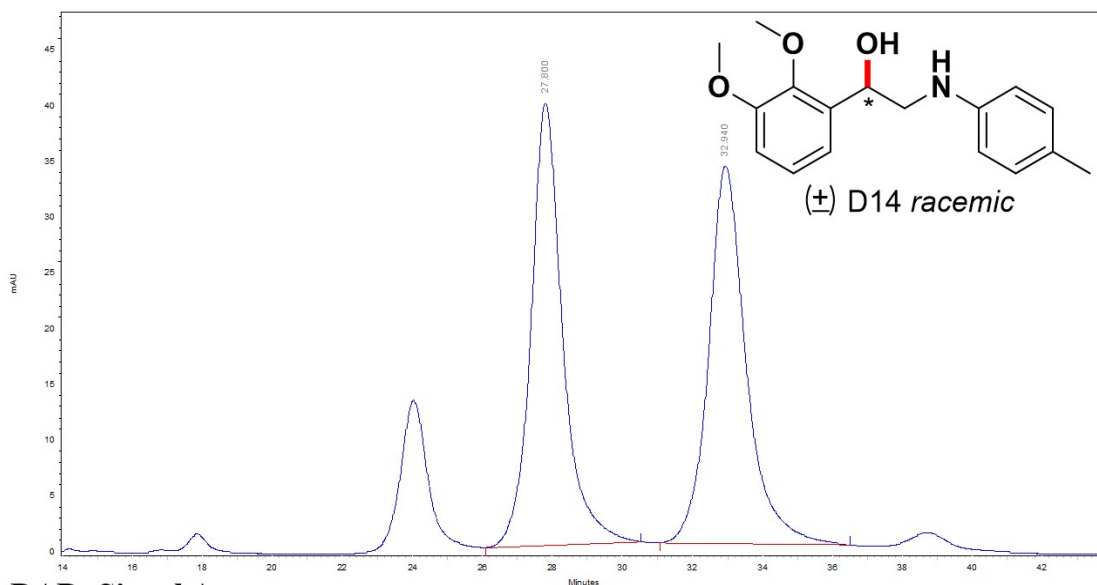

**DAD: Signal A,  
250 nm/Bw:4  
nm Results**

| Retention Time | Area    | Area % | Height | Height % |
|----------------|---------|--------|--------|----------|
| 27.800         | 5239156 | 49.57  | 83133  | 53.94    |
| 32.940         | 5329656 | 50.43  | 71002  | 46.06    |

| Totals | Area     | Area % | Height | Height % |
|--------|----------|--------|--------|----------|
|        | 10568812 | 100.00 | 154135 | 100.00   |

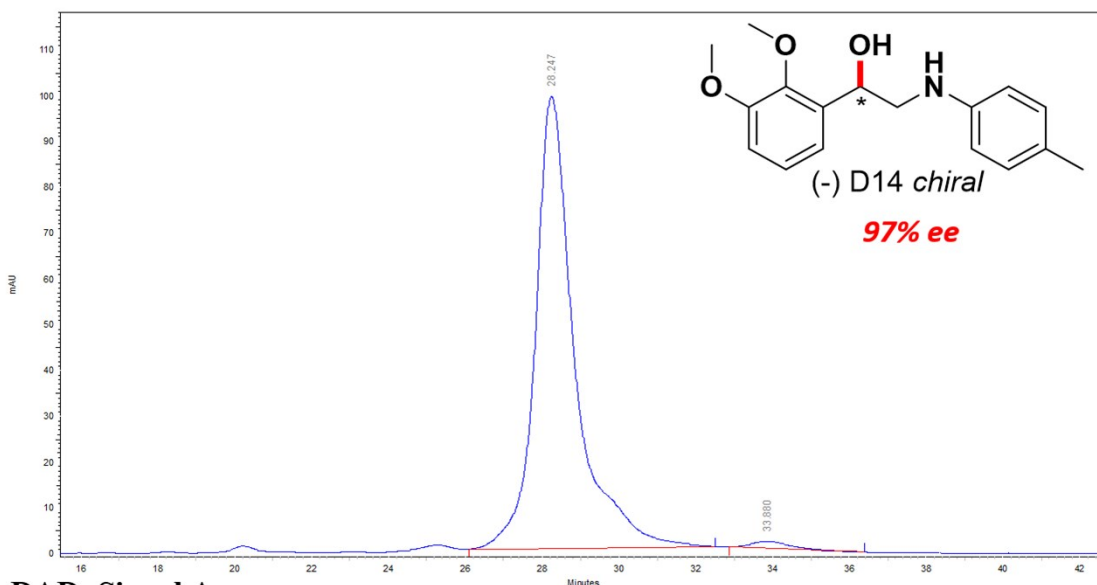

**DAD: Signal A,  
250 nm/Bw:4  
nm Results**

| Retention Time | Area     | Area % | Height | Height % |
|----------------|----------|--------|--------|----------|
| 28.247         | 14794673 | 98.57  | 207046 | 98.50    |
| 33.880         | 213935   | 1.43   | 3145   | 1.50     |

| Totals | Area     | Area % | Height | Height % |
|--------|----------|--------|--------|----------|
|        | 15008608 | 100.00 | 210191 | 100.00   |



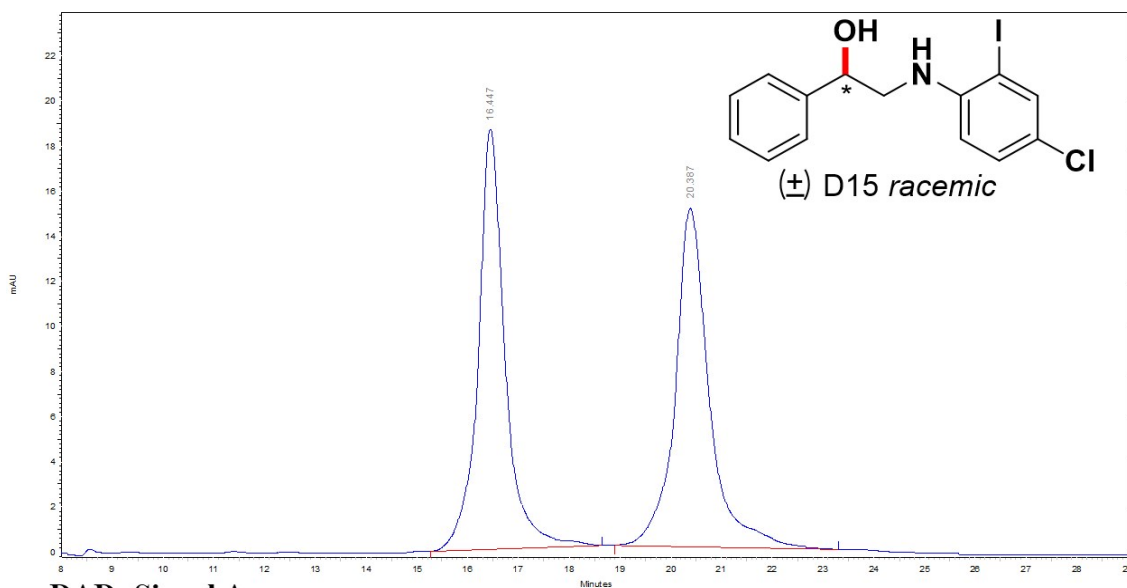

**DAD: Signal A,  
250 nm/Bw:4  
nm Results**

| Retention Time | Area    | Area % | Height | Height % |
|----------------|---------|--------|--------|----------|
| 16.447         | 1442884 | 49.48  | 39009  | 55.35    |
| 20.387         | 1473100 | 50.52  | 31465  | 44.65    |

| Totals | Area    | Area % | Height | Height % |
|--------|---------|--------|--------|----------|
|        | 2915984 | 100.00 | 70474  | 100.00   |

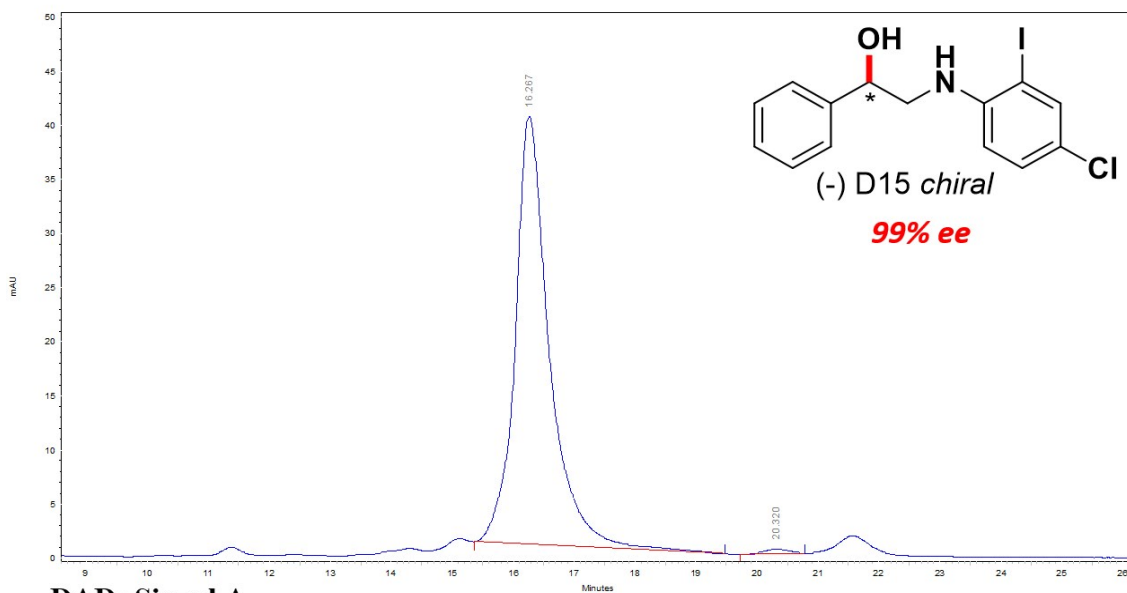

**DAD: Signal A,  
250 nm/Bw:4  
nm Results**

| Retention Time | Area    | Area % | Height | Height % |
|----------------|---------|--------|--------|----------|
| 16.267         | 3241812 | 99.34  | 83022  | 99.04    |
| 20.320         | 21664   | 0.66   | 802    | 0.96     |

| Totals | Area    | Area % | Height | Height % |
|--------|---------|--------|--------|----------|
|        | 3263476 | 100.00 | 83824  | 100.00   |

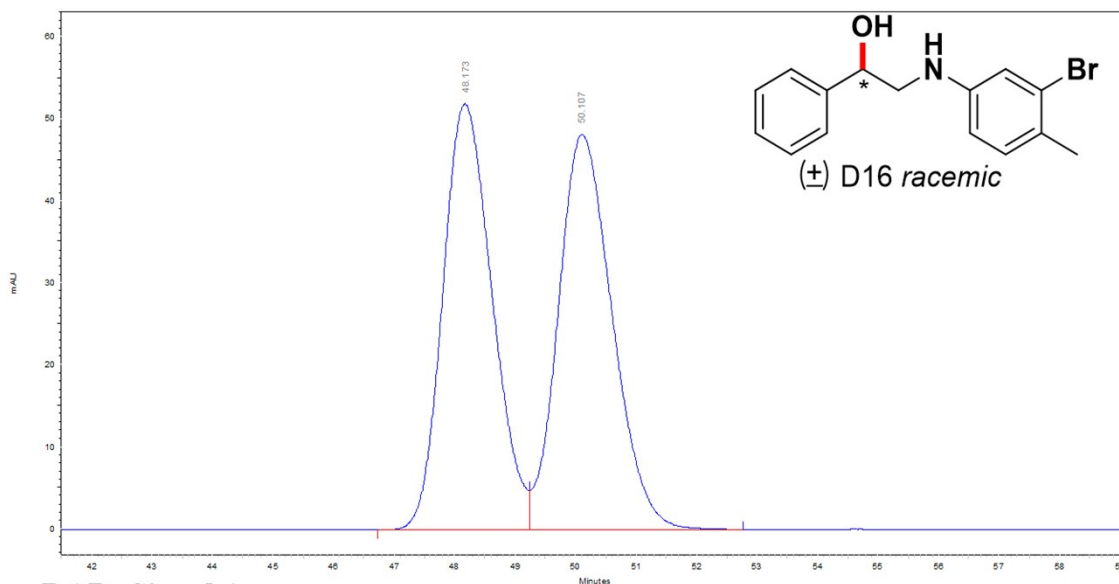

**DAD: Signal A,  
250 nm/Bw:4  
nm Results**

| Retention Time | Area    | Area % | Height | Height % |
|----------------|---------|--------|--------|----------|
| 48.173         | 6177198 | 49.55  | 108971 | 51.87    |
| 50.107         | 6289613 | 50.45  | 101123 | 48.13    |

| Totals | Area     | Area % | Height | Height % |
|--------|----------|--------|--------|----------|
|        | 12466811 | 100.00 | 210094 | 100.00   |

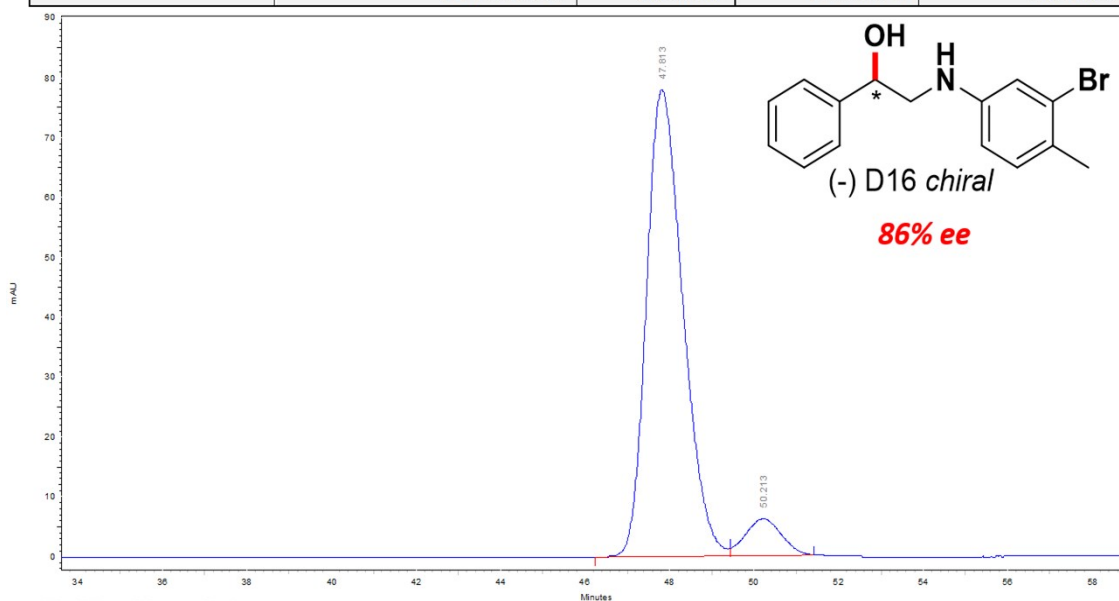

**DAD: Signal A,  
250 nm/Bw:4  
nm Results**

| Retention Time | Area    | Area % | Height | Height % |
|----------------|---------|--------|--------|----------|
| 47.813         | 9777871 | 92.78  | 163448 | 92.72    |
| 50.213         | 760436  | 7.22   | 12830  | 7.28     |

| Totals | Area     | Area % | Height | Height % |
|--------|----------|--------|--------|----------|
|        | 10538307 | 100.00 | 176278 | 100.00   |

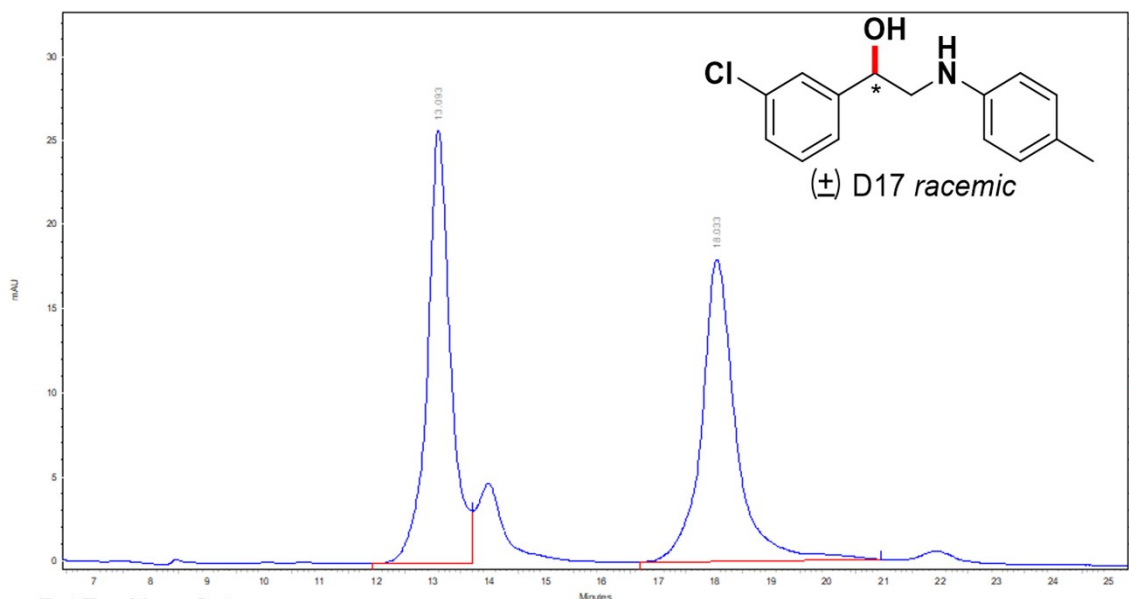

**DAD: Signal A,  
250 nm/Bw:4  
nm Results**

| Retention Time | Area    | Area % | Height | Height % |
|----------------|---------|--------|--------|----------|
| 13.093         | 1545510 | 49.19  | 54090  | 58.91    |
| 18.033         | 1596266 | 50.81  | 37723  | 41.09    |

| Totals | Area    | Area % | Height | Height % |
|--------|---------|--------|--------|----------|
|        | 3141776 | 100.00 | 91813  | 100.00   |

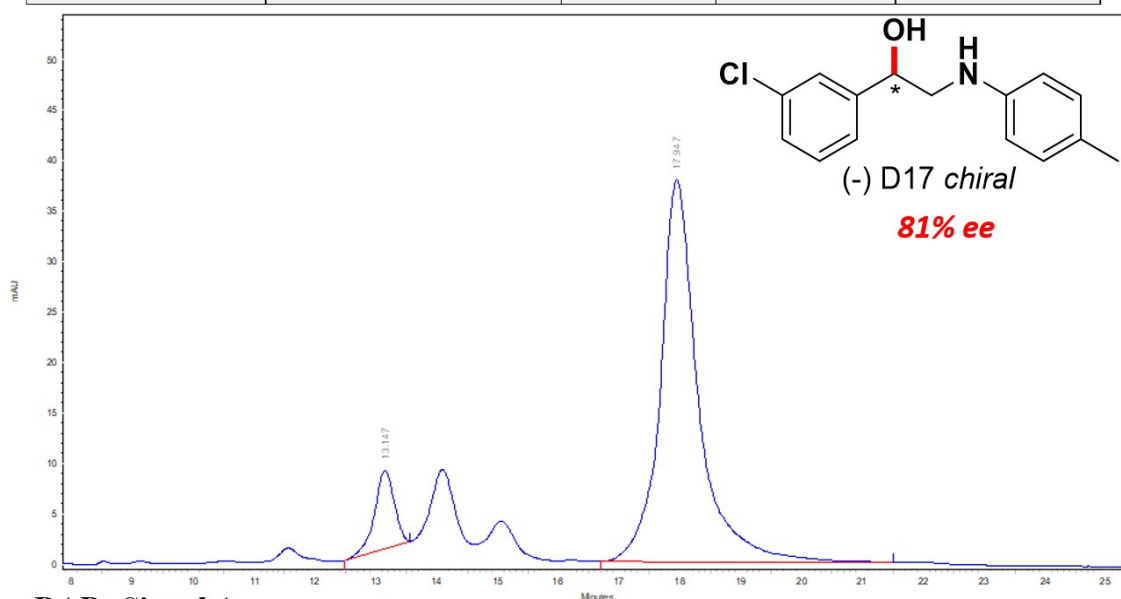

**DAD: Signal A,  
250 nm/Bw:4  
nm Results**

| Retention Time | Area    | Area % | Height | Height % |
|----------------|---------|--------|--------|----------|
| 13.147         | 365846  | 9.57   | 16214  | 16.98    |
| 17.947         | 3458402 | 90.43  | 79282  | 83.02    |

| Totals | Area    | Area % | Height | Height % |
|--------|---------|--------|--------|----------|
|        | 3824248 | 100.00 | 95496  | 100.00   |

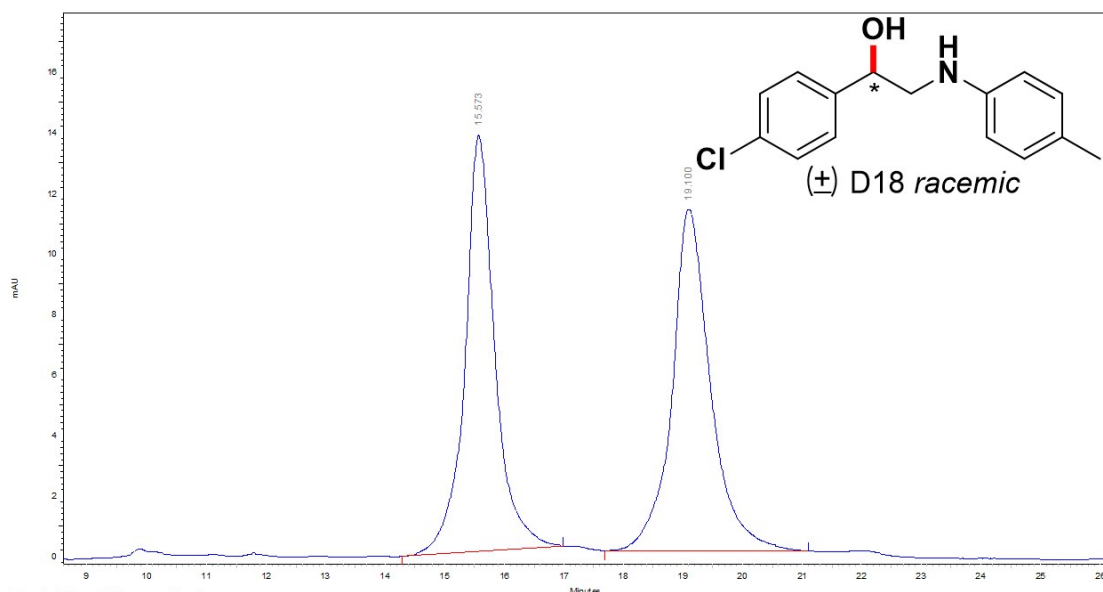

**DAD: Signal A,  
250 nm/Bw:4  
nm Results**

| Retention Time | Area    | Area % | Height | Height % |
|----------------|---------|--------|--------|----------|
| 15.573         | 1007016 | 48.48  | 28820  | 54.88    |
| 19.100         | 1070236 | 51.52  | 23699  | 45.12    |

| Totals | Area    | Area % | Height | Height % |
|--------|---------|--------|--------|----------|
|        | 2077252 | 100.00 | 52519  | 100.00   |

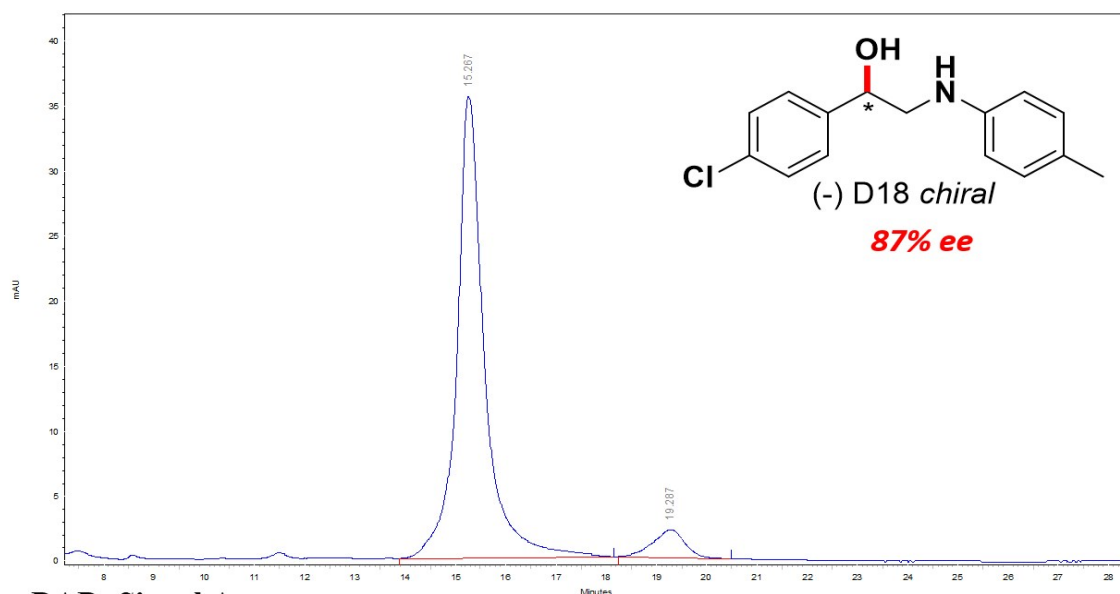

**DAD: Signal A,  
250 nm/Bw:4  
nm Results**

| Retention Time | Area    | Area % | Height | Height % |
|----------------|---------|--------|--------|----------|
| 15.267         | 2849634 | 93.44  | 74424  | 94.24    |
| 19.287         | 200162  | 6.56   | 4545   | 5.76     |

| Totals | Area    | Area % | Height | Height % |
|--------|---------|--------|--------|----------|
|        | 3049796 | 100.00 | 78969  | 100.00   |
